# Supplementary material for: Structures, electronic properties and solid state luminescence of Cu(i) iodide complexes with 2,9-dimethyl-1,10-phenanthroline and aliphatic aminomethylphosphines or triphenylphosphine
Source: Royal Society of Chemistry journal article supplement (doi:10.1039/c0dt01284j), 2011-01-01
Supplement: c0dt01284j.pdf [file c0dt01284j.pdf]

## Structures, Electronic Properties and Solid State Luminescence of Cu(I) Iodide Complexes with 2,9-dimethyl-1,10-phenanthroline and Aliphatic Aminomethylphosphines or Triphenylphosphine

Radosław Starosta\*, Małgorzata Puchalska, Joanna Cybińska, Maciej Barys and Anja V. Mudring

The luminescent complexes of triphenylphosphine and two interesting aminomethylphosphines:  $\text{P}(\text{CH}_2\text{N}(\text{CH}_2\text{CH}_2)_2\text{NCH}_3)_3$  and  $\text{P}(\text{CH}_2\text{N}(\text{CH}_2\text{CH}_2)_2\text{O})_3$  with copper(I) iodide and 2,9-dimethyl-1,10-phenanthroline (dmp):  $[\text{CuI}(\text{dmp})\text{PPh}_3]$ ,  $[\text{CuI}(\text{dmp})\text{P}(\text{CH}_2\text{N}(\text{CH}_2\text{CH}_2)_2\text{NCH}_3)_3]$  and  $[\text{CuI}(\text{phen})\text{P}(\text{CH}_2\text{N}(\text{CH}_2\text{CH}_2)_2\text{O})_3]$  are presented in this work. These complexes were characterized in solutions by means of the NMR spectroscopy and their structures were crystallographically determined in the solid state. All complexes crystallize as the discrete dimers bound by  $\pi$ -stacking interactions between dmp rings. The coordination geometry about the Cu(I) centre is pseudo-tetrahedral showing the small flattening and the large rocking distortions. Investigated compounds exhibit intense orange photoluminescence in the solid state (emission peaks at r.t.:  $\lambda_{\text{max}} = 588\text{-}592\text{nm}$ ;  $\tau = 1.7\text{-}2.2$  and  $6.4\text{-}10.0 \mu\text{s}$ ; at 77 K:  $\lambda_{\text{max}} = 605\text{-}612\text{nm}$ ;  $\tau = 4.8\text{-}6.5$  and  $32\text{-}47 \mu\text{s}$ ) which is several orders higher than the luminescence of the analogous complexes with 1,10-phenanthroline (phen). To interpret the photophysics of the  $[\text{CuI}(\text{dmp}/\text{phen})\text{PR}_3]$  complexes electronic and structural properties of the dmp and phen complexes were characterized using DFT methods. On the basis TDDFT calculations the broad CT bands observed in UV-Vis spectra are interpreted as the two mixed transitions ( $S_5$  and  $S_6$  (or  $S_4$  and  $S_5$ ):  $\text{HOMO-2} \rightarrow \text{LUMO}$  and  $\text{HOMO-2} \rightarrow \text{LUMO}+1$ ) from  $\sigma(\text{CuI})$  and  $\sigma(\text{CuP})$  bond to  $\pi^*$  phen or dmp ligand (MX, MPR<sub>3</sub>)LCT, while the emissions the most probably occur from two triplet states ( $T_1$ :  $\text{HOMO} \rightarrow \text{LUMO}$  and  $T_2$ :  $\text{HOMO-1} \rightarrow \text{LUMO}$ ) which are in thermal equilibrium.

**Table S1. NMR spectra in CDCl<sub>3</sub> at 298 K.**

|                    | dmp         | 1           | 3           | 4 (PPh <sub>3</sub> ) | 1N           | 1N1         | 3N           | 3N3          | 4N                     | 4N4           |
|--------------------|-------------|-------------|-------------|-----------------------|--------------|-------------|--------------|--------------|------------------------|---------------|
| P                  |             | -60.87      | -62.77      |                       | -28.5*       | -29*; -60*  | -28.5*       | -29*; -60*   | -6*                    | -6*           |
| C <sup>2,9</sup>   | 159.07      |             |             | 157.45                | 159.08       | 159.08      | 159.14       | 159.02       | 159.43                 | 159.31        |
| C <sup>3,8</sup>   | 123.29      |             |             | 125.51                | 124.86       | 124.78      | 124.92       | 124.84       | 124.89                 | 124.83        |
| C <sup>4,7</sup>   | 136.07      |             |             | 137.14                | 136.45       | 136.35      | 136.59       | 136.55       | 136.27                 | 136.33        |
| C <sup>5,6</sup>   | 125.22      |             |             | 125.97                | 125.33       | 125.27      | 125.41       | 125.36       | 125.29                 | 125.28        |
| C <sup>11,12</sup> | 145.03      |             |             | 142.86                | 142.94       | 142.90      | 142.88       | 142.79       | 143.09                 | 142.99        |
| C <sup>13,14</sup> | 126.58      |             |             | 127.44                | 127.05       | 127.00      | 127.09       | 127.02       | 127.00                 | 126.96        |
| C <sup>Me</sup>    | 25.64       |             |             | 25.80                 | 27.59        | 27.65       | 27.60        | 27.55        | 26.84                  | 26.68**       |
| H <sup>3,8</sup>   | 7.42 (8.16) |             |             | 7.79 (8.36)           | 7.62 (8.36)  | 7.58 (8.16) | 7.64 (8.16)  | 7.62 (8.32)  | under PPh <sub>3</sub> | 7.43 (8.36)   |
| H <sup>4,7</sup>   | 8.04 (8.16) |             |             | 8.54 (8.14)           | 8.23 (8.36)  | 8.20 (8.16) | 8.25 (8.16)  | 8.24 (8.32)  | 8.16 (8.16)            | 8.16 (8.16)   |
| H <sup>5,6</sup>   | 7.62        |             |             | 8.04                  | 7.77         | 7.74        | 7.79         | 7.77         | 7.75                   | 7.74          |
| H <sup>Me</sup>    | 2.90        |             |             | 2.41                  | 3.20         | 3.20        | 3.24         | 3.23         | 2.84                   | 2.81          |
| C <sup>1-P</sup>   |             | 58.69 (3.5) | 59.31 (4.3) | 137.14 (10.8)         | not observed | 58-55       | 55.8s*       | 56.6s*       | 134.24 (28.5)          | 136.29 (6.81) |
| C <sup>2-P</sup>   |             | 55.21 (7.9) | 56.11 (8.1) | 133.71 (19.8)         | 55.0-55.2    | 55.1-54.8   | 55.53 (4.7)* | 55.47 (6.1)* | 133.55 (14.4)          | 133.63 (16.8) |
| C <sup>3-P</sup>   |             | 55.73       | 67.57       | 128.46 (7.06)         | 54.92        | 55.02       | 66.71        | 66.77        | 128.21 (9.0)           | 128.34 (7.7)  |
| C <sup>4-P</sup>   |             | 46.25       |             | 128.68                | 45.79        | 46.91       |              |              | 129.25 (1.2)           | 128.99*       |
| H <sup>1-P</sup>   |             | 2.58 (3.03) | 2.64(2.95)  |                       | 2.87         | 2.73        | 2.88         | 2.77         |                        |               |
| H <sup>2-P</sup>   |             | 2.50        | 2.49        |                       | 2.52         | 2.53        | 2.52         | 2.51         |                        |               |
| H <sup>3-P</sup>   |             | 2.31        | 3.58        |                       | 2.18         | 2.27        | 3.48         | 3.36         |                        |               |
| H <sup>4-P</sup>   |             | 2.15        |             |                       | 2.17         | 2.20        |              |              |                        |               |

\* - broadened signal, \*\* - signal of a very low intensity

**Fig S1. X-ray structures - view of 1N along dmp plane**

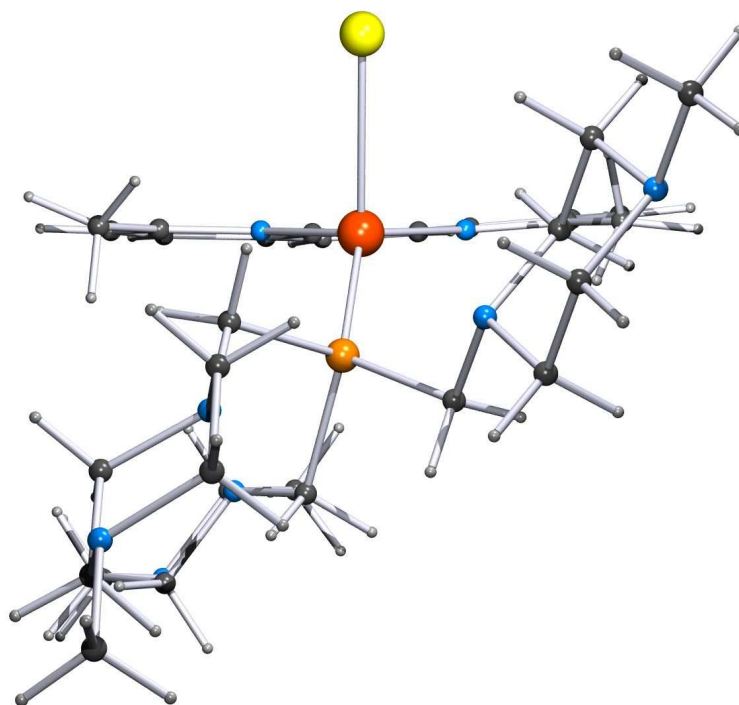

**Fig S2. X-ray structures - crystal packing of 1N**

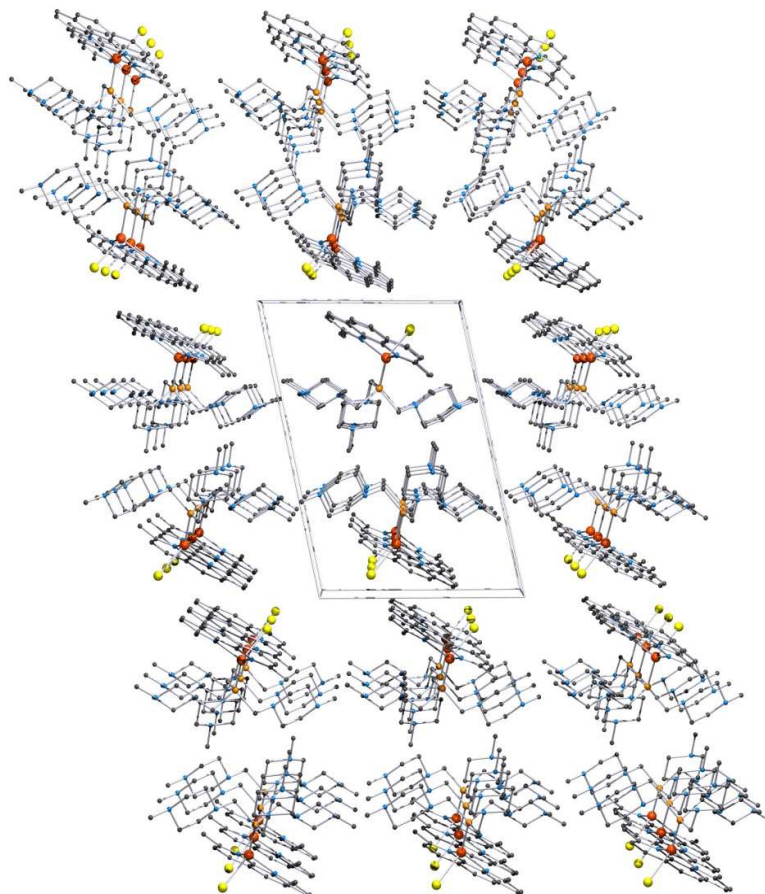

**Fig S3. X-ray structures - view of 3N along dmp plane**

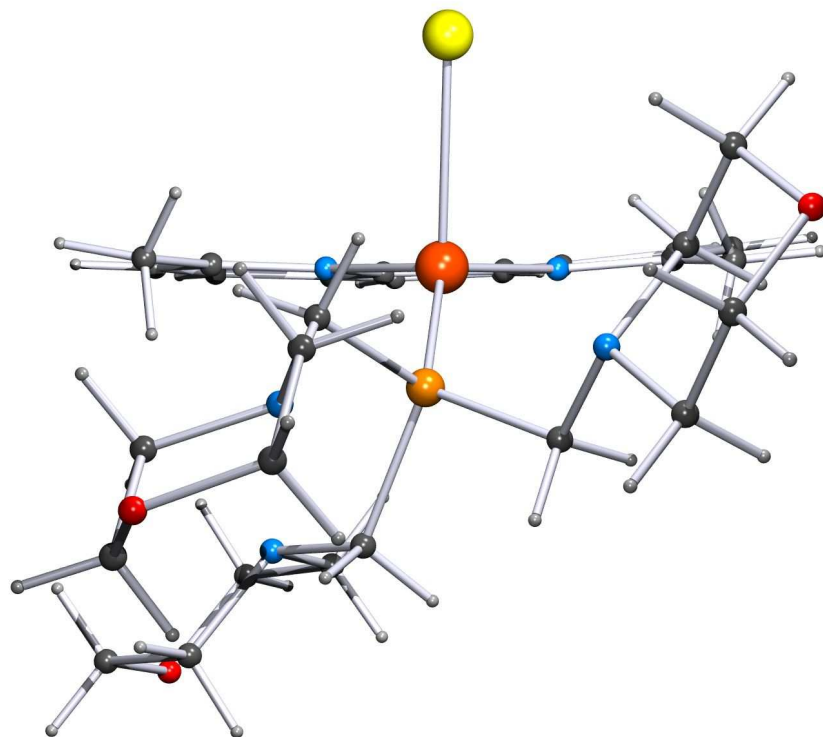

**Fig S4. X-ray structures - crystal packing of 3N**

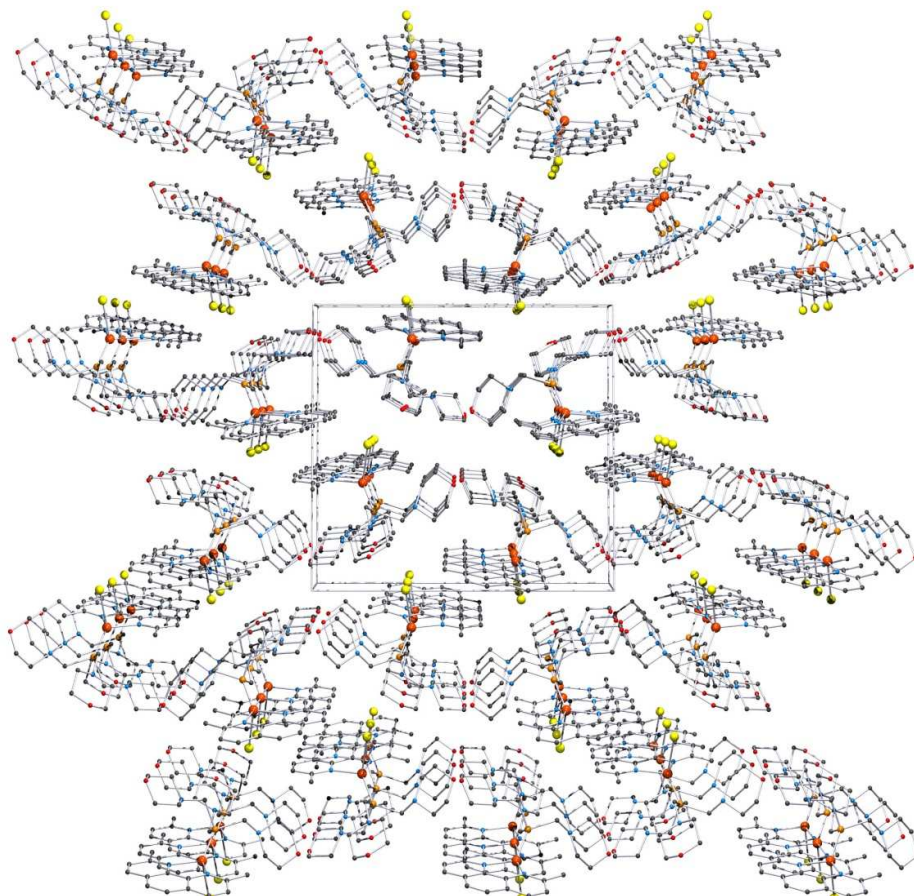

**Fig S5. X-ray structures - view of 4N along dmp plane**

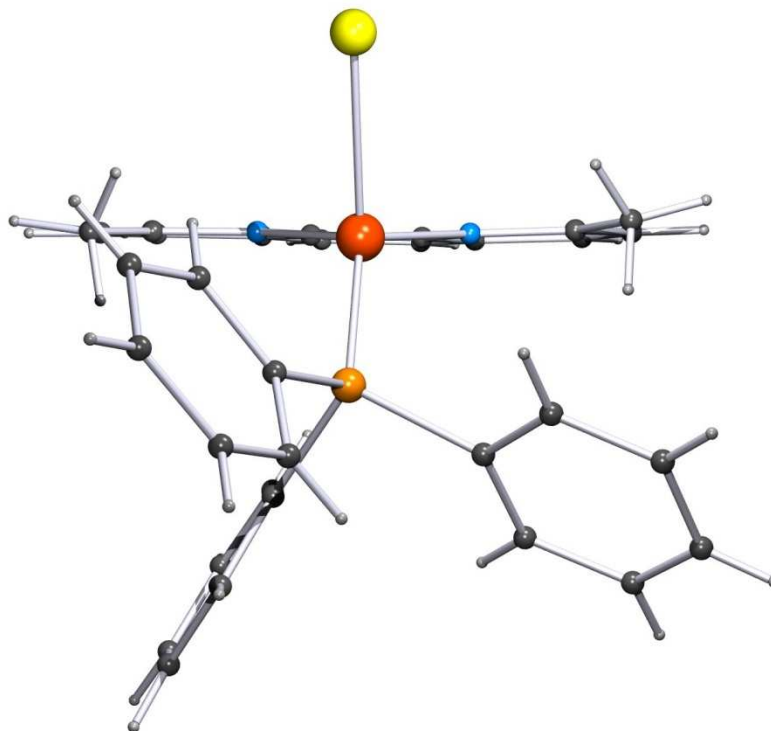

**Fig S6. X-ray structures - crystal packing of 4N**

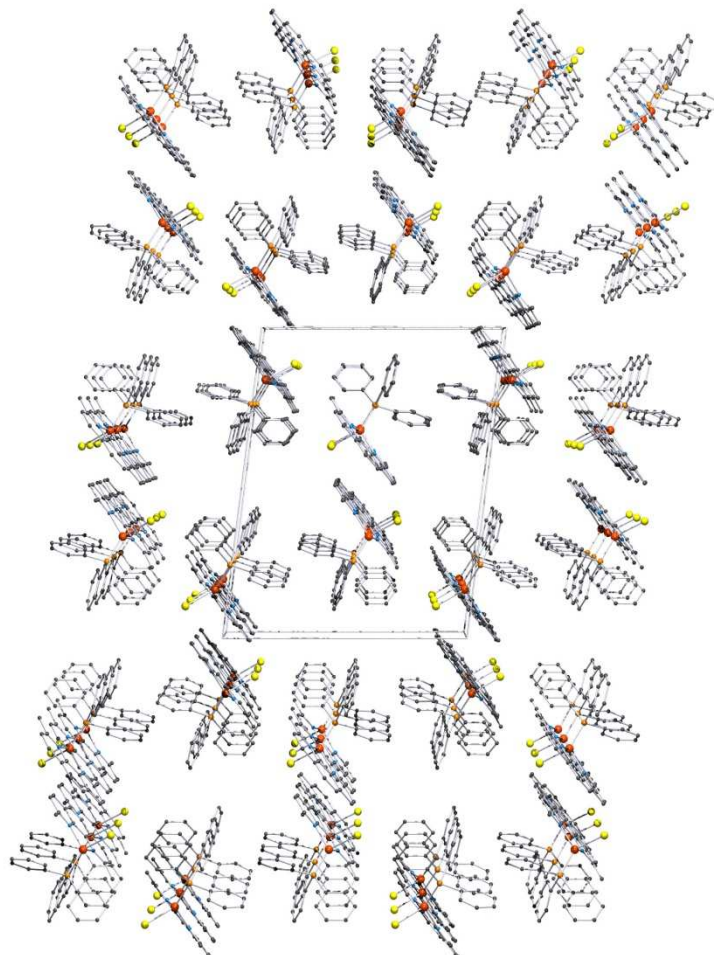

**Table S2. 1N** – molecular orbitals energy and contributions.

|            | 176                | 177                | 178                | 179                | 180               | 181                | 182               | 183                | 184                |
|------------|--------------------|--------------------|--------------------|--------------------|-------------------|--------------------|-------------------|--------------------|--------------------|
| Energy:    | (A)--O<br>-0.30553 | (A)--O<br>-0.29295 | (A)--O<br>-0.26096 | (A)--O<br>-0.25725 | (A)--O<br>-0.2505 | (A)--O<br>-0.24915 | (A)--O<br>-0.2398 | (A)--O<br>-0.23114 | (A)--O<br>-0.22455 |
| %          |                    |                    |                    |                    |                   |                    |                   |                    |                    |
| Cu:        | 4.8                | 40.3               | 77.0               | 32.9               | 88.9              | 73.3               | 13.0              | 49.4               | 17.0               |
| I:         | 0.1                | 0.3                | 17.7               | 1.3                | 1.6               | 1.4                | 0.7               | 4.1                | 2.3                |
| phosphine: | 1.6                | 51.9               | 2.5                | 1.7                | 3.6               | 2.6                | 6.5               | 34.8               | 72.8               |
| dmp:       | 93.5               | 7.5                | 2.7                | 64.1               | 5.9               | 22.7               | 79.8              | 11.7               | 7.9                |

  

|         | 185                | 186                | 187                | 188                | 189                | 190                | 191                | 192                | 193                | 194                | 195                |
|---------|--------------------|--------------------|--------------------|--------------------|--------------------|--------------------|--------------------|--------------------|--------------------|--------------------|--------------------|
| Energy: | (A)--O<br>-0.22122 | (A)--O<br>-0.21705 | (A)--O<br>-0.21294 | (A)--O<br>-0.21149 | (A)--O<br>-0.20884 | (A)--O<br>-0.20393 | (A)--O<br>-0.18546 | (A)--O<br>-0.17952 | (A)--O<br>-0.17581 | (A)--V<br>-0.06963 | (A)--V<br>-0.06532 |
| %       |                    |                    |                    |                    |                    |                    |                    |                    |                    |                    |                    |
| 51.9    | 0.2                | 4.1                | 6.9                | 6.5                | 0.5                | 32.1               | 10.0               | 11.9               | 2.4                | 0.2                |                    |
| 2.5     | 0.1                | 0.1                | 0.6                | 2.5                | 0.1                | 50.4               | 83.4               | 76.6               | 1.7                | 0.1                |                    |
| 27.0    | 99.1               | 94.4               | 90.4               | 89.4               | 98.4               | 11.1               | 1.7                | 9.9                | 1.4                | 0.7                |                    |
| 18.6    | 0.6                | 1.4                | 2.1                | 1.5                | 0.9                | 6.5                | 4.8                | 1.6                | 94.5               | 99.0               |                    |

  

|         | 196               | 197               | 198               | 199               | 200               |
|---------|-------------------|-------------------|-------------------|-------------------|-------------------|
| Energy: | (A)--V<br>-0.0201 | (A)--V<br>0.00636 | (A)--V<br>0.02168 | (A)--V<br>0.03153 | (A)--V<br>0.04369 |
| %       |                   |                   |                   |                   |                   |
| 2.1     | 1.8               | 47.7              | 16.1              | 63.5              |                   |
| 1.2     | 0.2               | 4.5               | 3.4               | 4.1               |                   |
| 3.1     | 0.9               | 33.6              | 72.4              | 23.9              |                   |
| 93.6    | 97.1              | 14.2              | 8.0               | 8.5               |                   |

**Fig S7. 1N UV-VIS spectrum** (blue lines – singlet transitions; red lines – triplet transitions)

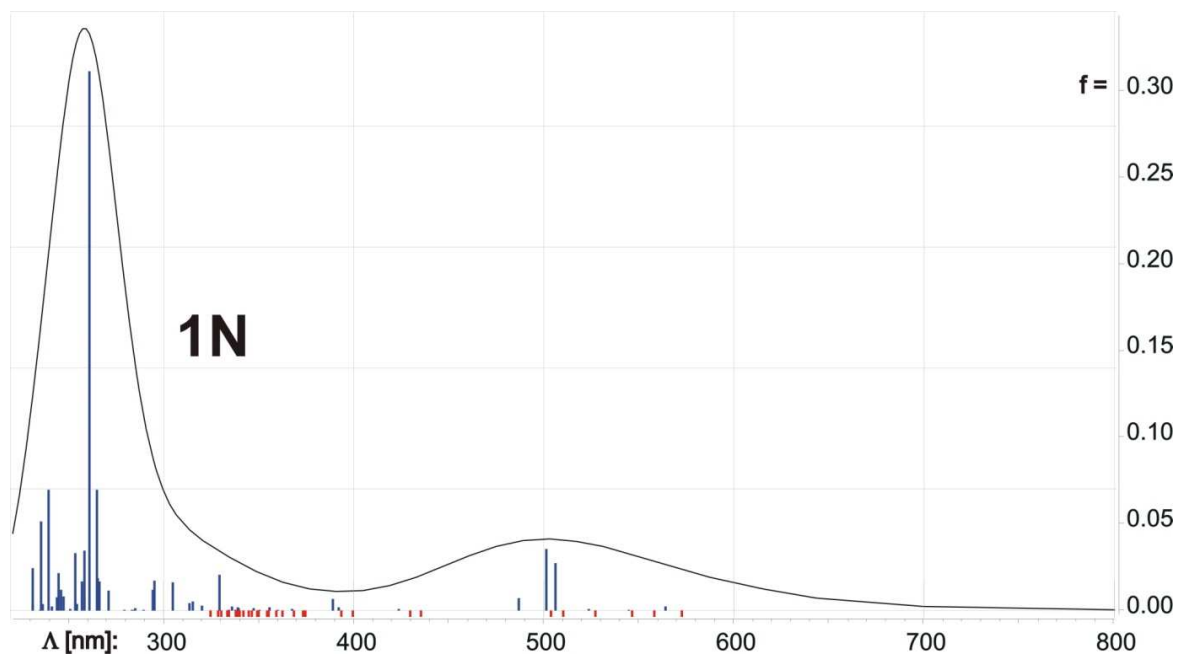

| No: | λ [nm] | osc. str. | Orbitals | %      | S5: 501.30 | f=0.0353 | 191->194 | 37.38  | 192->195   | 2.10     |          |       |
|-----|--------|-----------|----------|--------|------------|----------|----------|--------|------------|----------|----------|-------|
| S1: | 564.17 | f=0.0021  | 193->194 | 100.00 |            |          | 192->195 | 62.62  | 193->194   | 5.36     |          |       |
| S2: | 544.91 | f=0.0005  | 192->194 | 100.00 | S6: 487.22 | f=0.0072 | 191->195 | 100.00 | T3: 546.11 | f=0.0000 | 191->194 | 83.55 |
| S3: | 523.96 | f=0.0006  | 193->195 | 100.00 | T1: 572.23 | f=0.0000 | 192->194 | 5.09   | 192->194   | 16.45    |          |       |
| S4: | 506.47 | f=0.0274  | 191->194 | 59.27  |            |          | 193->194 | 94.91  |            |          |          |       |
|     |        |           | 192->195 | 40.73  | T2: 557.84 | f=0.0000 | 191->194 | 17.89  |            |          |          |       |
|     |        |           |          |        |            |          | 192->194 | 74.65  |            |          |          |       |

**Table S3. 3N** – molecular orbitals energy and contributions.

|            |          |          |          |          |          |          |          |          |          |          |         |
|------------|----------|----------|----------|----------|----------|----------|----------|----------|----------|----------|---------|
|            | 166      | 167      | 168      | 169      | 170      | 171      | 172      | 173      | 174      |          |         |
|            | (A)--O   |          |         |
| Energy:    | -0.26194 | -0.25984 | -0.2561  | -0.25434 | -0.24902 | -0.24536 | -0.24181 | -0.2399  | -0.23242 |          |         |
| %          |          |          |          |          |          |          |          |          |          |          |         |
| Cu:        | 8.5      | 9.4      | 13.5     | 52.5     | 11.1     | 13.4     | 86.3     | 75.5     | 5.5      |          |         |
| I:         | 1.3      | 1.2      | 3.3      | 17.3     | 1.2      | 2.1      | 3.3      | 1.8      | 0.2      |          |         |
| phosphine: | 41.6     | 55.8     | 82.4     | 27.4     | 82.1     | 20.2     | 5.0      | 9.9      | 90.1     |          |         |
| dmp:       | 48.5     | 33.5     | 0.8      | 2.8      | 5.6      | 64.3     | 5.4      | 12.8     | 4.2      |          |         |
|            | 175      | 176      | 177      | 178      | 179      | 180      | 181      | 182      | 183      | 184      | 185     |
|            | (A)--O   | (A)--O   | (A)--O   | (A)--O   | (A)--O   | (A)--O   | (A)--V   | (A)--V   | (A)--V   | (A)--V   | (A)--V  |
|            | -0.22654 | -0.22087 | -0.21652 | -0.21365 | -0.18651 | -0.18277 | -0.17894 | -0.07429 | -0.07018 | -0.02502 | 0.00132 |
|            |          |          |          |          |          |          |          |          |          |          |         |
|            | 39.9     | 16.1     | 22.3     | 57.2     | 37.2     | 15.7     | 18.0     | 2.6      | 0.2      | 2.0      | 1.6     |
|            | 3.6      | 1.7      | 5.3      | 3.5      | 47.4     | 77.2     | 69.6     | 1.7      | 0.1      | 1.1      | 0.1     |
|            | 52.8     | 77.9     | 69.0     | 23.6     | 8.7      | 1.4      | 10.7     | 1.5      | 0.7      | 3.2      | 0.9     |
|            | 3.7      | 4.3      | 3.4      | 15.7     | 6.7      | 5.7      | 1.8      | 94.3     | 99.0     | 93.8     | 97.4    |
|            | 186      | 187      | 188      | 189      | 190      |          |          |          |          |          |         |
|            | (A)--V   | (A)--V   | (A)--V   | (A)--V   | (A)--V   |          |          |          |          |          |         |
|            | 0.01703  | 0.02705  | 0.03892  | 0.04294  | 0.04599  |          |          |          |          |          |         |
|            |          |          |          |          |          |          |          |          |          |          |         |
|            | 46.8     | 13.8     | 63.9     | 58.0     | 5.6      |          |          |          |          |          |         |
|            | 4.4      | 3.2      | 3.9      | 2.2      | 0.2      |          |          |          |          |          |         |
|            | 35.0     | 75.5     | 24.0     | 29.0     | 14.0     |          |          |          |          |          |         |
|            | 13.9     | 7.5      | 8.2      | 10.8     | 80.2     |          |          |          |          |          |         |

**Fig S8. 3N UV-VIS spectrum** (blue lines – singlet transitions; red lines – triplet transitions)

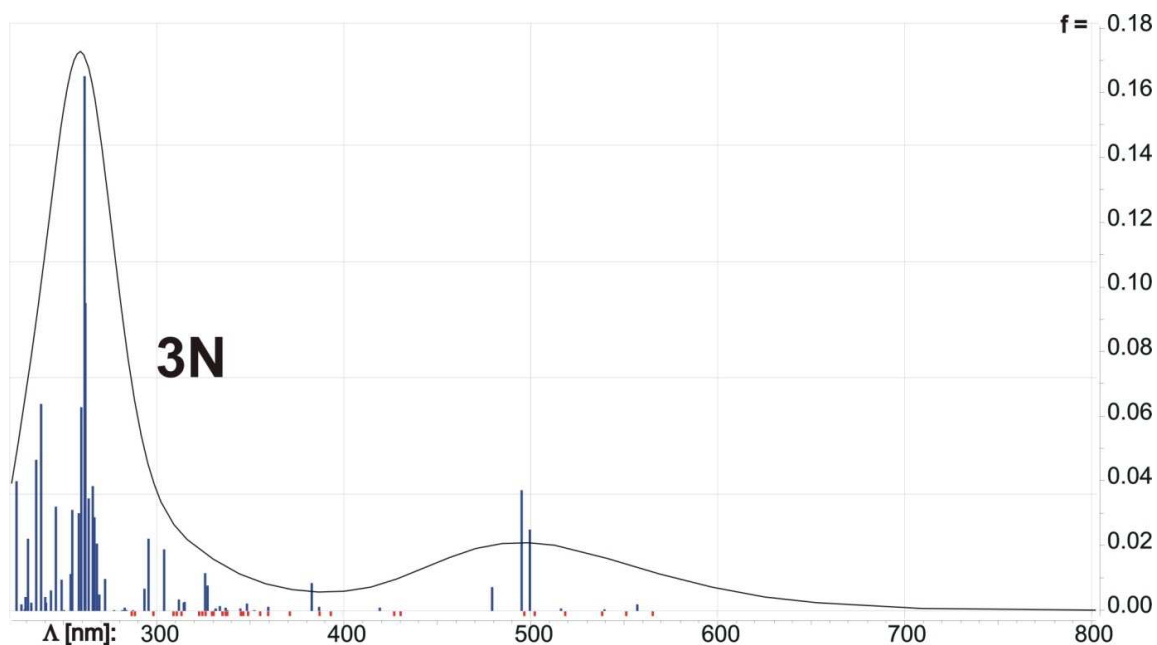

| No: | $\lambda$ [nm] | osc. str. | Orbitals | %      |  |            |          |          |       |
|-----|----------------|-----------|----------|--------|--|------------|----------|----------|-------|
| S5: | 495.06         | f=0.0373  | 179->182 | 41.01  |  |            | 179->182 | 10.79    |       |
|     |                |           | 180->183 | 58.99  |  |            | 180->182 | 78.90    |       |
| S6: | 479.43         | f=0.0074  | 179->183 | 100.00 |  |            | 181->182 | 8.07     |       |
| T1: | 565.52         | f=0.0000  | 180->182 | 7.03   |  | T3: 538.46 | f=0.0000 | 179->182 | 89.60 |
|     |                |           | 181->182 | 92.97  |  |            |          | 180->182 | 10.40 |
| T2: | 551.36         | f=0.0000  | 178->182 | 2.24   |  |            |          |          |       |
| S4: | 499.78         | f=0.0252  | 179->182 | 55.85  |  |            |          |          |       |
|     |                |           | 180->183 | 44.15  |  |            |          |          |       |

**Table S4. 4N** – molecular orbitals energy and contributions.

|            |          |          |          |          |          |          |          |          |          |          |          |
|------------|----------|----------|----------|----------|----------|----------|----------|----------|----------|----------|----------|
|            | 141      | 142      | 143      | 144      | 145      | 146      | 147      | 148      | 149      |          |          |
|            | (A)--O   |          |          |
| Energy:    | -0.31017 | -0.30723 | -0.30508 | -0.30368 | -0.26374 | -0.2611  | -0.25808 | -0.2563  | -0.25422 |          |          |
| %          |          |          |          |          |          |          |          |          |          |          |          |
| Cu:        | 0.7      | 16.4     | 10.5     | 21.5     | 3.5      | 3.5      | 9.7      | 3.1      | 7.2      |          |          |
| I:         | 0.1      | 0.0      | 0.0      | 0.1      | 0.4      | 0.2      | 0.2      | 0.3      | 0.2      |          |          |
| phosphine: | 0.5      | 1.2      | 2.2      | 51.5     | 93.1     | 93.8     | 88.4     | 17.3     | 76.7     |          |          |
| dmp:       | 98.7     | 82.4     | 87.2     | 26.9     | 3.0      | 2.5      | 1.7      | 79.3     | 15.9     |          |          |
|            | 150      | 151      | 152      | 153      | 154      | 155      | 156      | 157      | 158      | 159      | 160      |
|            | (A)--O   |
|            | -0.25051 | -0.24995 | -0.24591 | -0.23959 | -0.23617 | -0.23376 | -0.21348 | -0.20878 | -0.18396 | -0.17688 | -0.17171 |
|            |          |          |          |          |          |          |          |          |          |          |          |
|            | 45.7     | 38.5     | 12.9     | 6.7      | 87.8     | 91.6     | 60.0     | 68.1     | 38.4     | 18.8     | 19.7     |
|            | 13.6     | 12.3     | 0.4      | 3.2      | 3.6      | 2.3      | 10.6     | 8.3      | 46.4     | 73.6     | 68.4     |
|            | 34.3     | 47.7     | 83.6     | 5.1      | 3.5      | 3.2      | 19.7     | 5.2      | 9.3      | 0.7      | 9.7      |
|            | 6.4      | 1.5      | 3.1      | 85.0     | 5.1      | 2.9      | 9.7      | 18.3     | 5.9      | 6.8      | 2.2      |
|            | 161      | 162      | 163      | 164      | 165      |          |          |          |          |          |          |
|            | (A)--V   | (A)--V   | (A)--V   | (A)--V   | (A)--V   |          |          |          |          |          |          |
|            | -0.06918 | -0.06541 | -0.02866 | -0.02328 | -0.02064 |          |          |          |          |          |          |
|            |          |          |          |          |          |          |          |          |          |          |          |
|            | 2.7      | 0.2      | 3.2      | 1.4      | 2.9      |          |          |          |          |          |          |
|            | 1.3      | 0.1      | 0.2      | 0.1      | 0.7      |          |          |          |          |          |          |
|            | 1.5      | 0.3      | 94.6     | 96.1     | 16.1     |          |          |          |          |          |          |
|            | 94.6     | 99.4     | 1.9      | 2.5      | 80.3     |          |          |          |          |          |          |

**Fig S9. 4N UV-VIS spectrum** (blue lines – singlet transitions; red lines – triplet transitions)

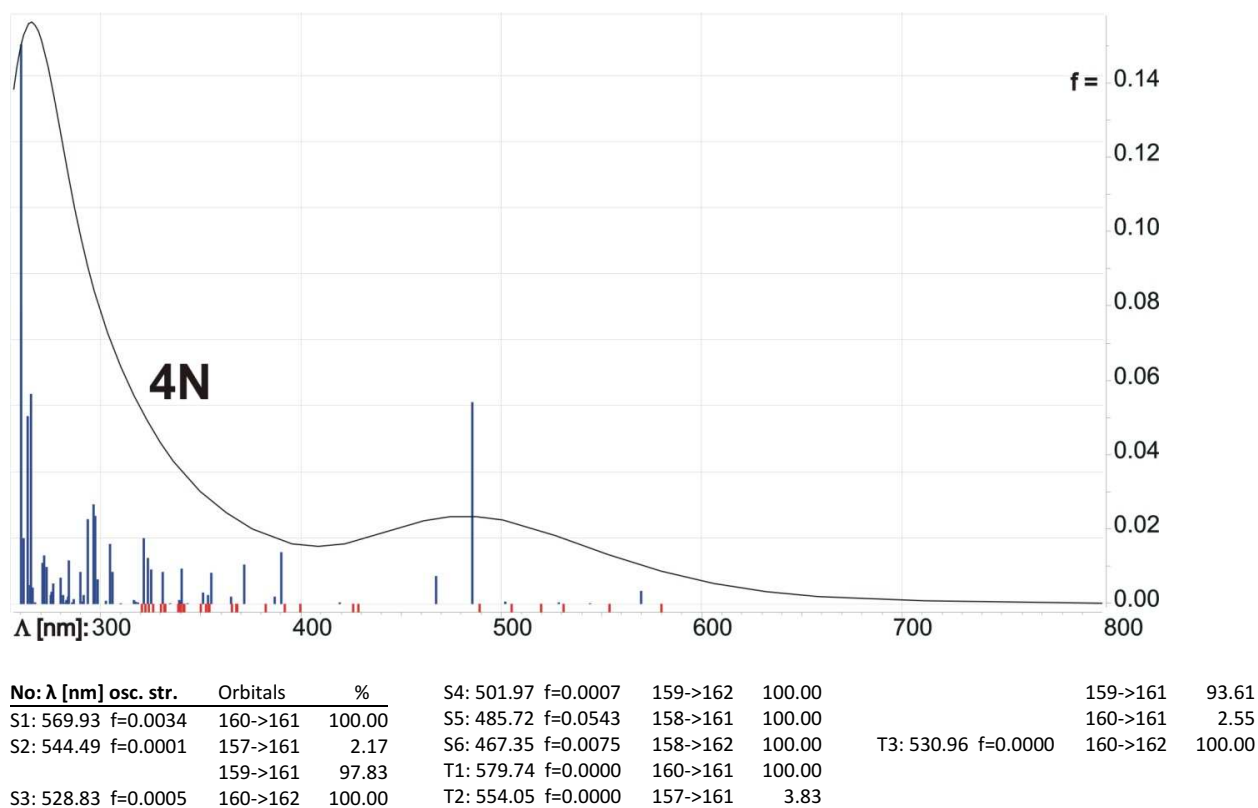



**Table S5. 1P** – molecular orbitals energy and contributions.

|            | 166                | 167                | 168                | 169                | 170                | 171                | 172                | 173                | 174               |
|------------|--------------------|--------------------|--------------------|--------------------|--------------------|--------------------|--------------------|--------------------|-------------------|
| Energy:    | (A)--O<br>-0.31692 | (A)--O<br>-0.31466 | (A)--O<br>-0.31166 | (A)--O<br>-0.28685 | (A)--O<br>-0.26619 | (A)--O<br>-0.25426 | (A)--O<br>-0.24946 | (A)--O<br>-0.23831 | (A)--O<br>-0.2382 |
| %          |                    |                    |                    |                    |                    |                    |                    |                    |                   |
| Cu:        | 2.6                | 16.8               | 1.8                | 36.7               | 2.4                | 19.7               | 63.1               | 90.3               | 88.2              |
| I:         | 0.1                | 0.0                | 0.0                | 0.4                | 0.1                | 3.4                | 21.0               | 2.6                | 2.7               |
| phosphine: | 70.1               | 17.2               | 91.7               | 57.4               | 0.2                | 1.2                | 2.2                | 4.1                | 4.5               |
| dmp:       | 27.2               | 66.0               | 6.5                | 5.5                | 97.3               | 75.7               | 13.7               | 3.1                | 4.7               |

  

|            | 175                | 176                | 177                | 178                | 179                | 180                | 181                | 182                | 183                | 184                | 185                |
|------------|--------------------|--------------------|--------------------|--------------------|--------------------|--------------------|--------------------|--------------------|--------------------|--------------------|--------------------|
| Energy:    | (A)--O<br>-0.22442 | (A)--O<br>-0.21877 | (A)--O<br>-0.21465 | (A)--O<br>-0.21239 | (A)--O<br>-0.21224 | (A)--O<br>-0.20923 | (A)--O<br>-0.20814 | (A)--O<br>-0.20398 | (A)--O<br>-0.17828 | (A)--O<br>-0.17369 | (A)--O<br>-0.16981 |
| %          |                    |                    |                    |                    |                    |                    |                    |                    |                    |                    |                    |
| Cu:        | 34.3               | 35.9               | 0.3                | 27.7               | 20.6               | 3.6                | 14.4               | 12.1               | 31.9               | 14.2               | 19.2               |
| I:         | 1.3                | 5.6                | 0.1                | 1.9                | 2.4                | 0.9                | 1.9                | 1.3                | 52.1               | 80.1               | 65.5               |
| phosphine: | 61.9               | 51.5               | 99.5               | 63.4               | 72.4               | 94.7               | 80.3               | 83.6               | 10.3               | 1.1                | 13.6               |
| dmp:       | 2.4                | 7.0                | 0.2                | 7.1                | 4.6                | 0.8                | 3.4                | 3.0                | 5.7                | 4.6                | 1.6                |

  

|            | 186                | 187                | 188                | 189                | 190               |
|------------|--------------------|--------------------|--------------------|--------------------|-------------------|
| Energy:    | (A)--V<br>-0.07599 | (A)--V<br>-0.07478 | (A)--V<br>-0.02931 | (A)--V<br>-0.00119 | (A)--V<br>0.02279 |
| %          |                    |                    |                    |                    |                   |
| Cu:        | 2.3                | 0.6                | 2.8                | 0.7                | 41.1              |
| I:         | 1.3                | 0.3                | 0.6                | 0.1                | 4.4               |
| phosphine: | 1.1                | 0.6                | 2.4                | 1.1                | 35.8              |
| dmp:       | 95.3               | 98.5               | 94.2               | 98.0               | 18.7              |

**Fig S10. 1P UV-VIS spectrum** (blue lines – singlet transitions; red lines – triplet transitions)

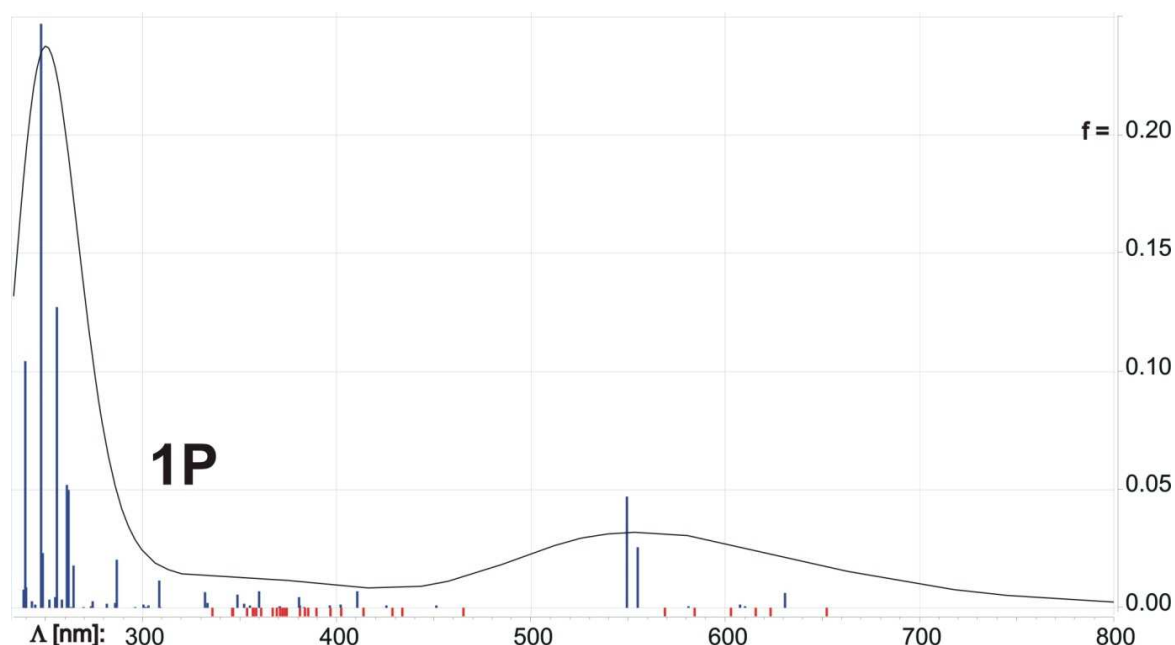

| No: | λ [nm] | osc. str. | Orbitals | %     |     |        |          |          |       |
|-----|--------|-----------|----------|-------|-----|--------|----------|----------|-------|
| S1: | 630.85 | f=0.0064  | 183->186 | 3.29  | S4: | 581.15 | f=0.0006 | 184->186 | 14.47 |
|     |        |           | 185->186 | 87.38 |     |        |          | 184->187 | 85.53 |
|     |        |           | 185->187 | 9.33  | S5: | 555.05 | f=0.0257 | 183->186 | 70.61 |
| S2: | 610.42 | f=0.0006  | 184->186 | 77.77 |     |        |          | 183->187 | 29.39 |
|     |        |           | 184->187 | 12.90 | S6: | 549.58 | f=0.0470 | 183->186 | 24.55 |
|     |        |           | 185->187 | 9.34  |     |        |          | 185->186 | 3.65  |
| S3: | 607.73 | f=0.0014  | 184->186 | 8.04  | T1: | 652.43 | f=0.0000 | 183->186 | 4.41  |
|     |        |           | 185->186 | 8.91  |     |        |          | 184->186 | 3.37  |
|     |        |           |          |       |     |        |          | 185->186 | 84.14 |
|     |        |           |          |       |     |        |          | 185->187 | 8.08  |
|     |        |           |          |       |     |        |          | 183->186 | 3.12  |
|     |        |           |          |       |     |        |          | 183->187 | 2.07  |
|     |        |           |          |       |     |        |          | 184->186 | 69.44 |
|     |        |           |          |       |     |        |          | 184->187 | 18.27 |
|     |        |           |          |       |     |        |          | 185->186 | 3.65  |
|     |        |           |          |       |     |        |          | 185->187 | 3.45  |
|     |        |           |          |       |     |        |          | 183->187 | 6.30  |
|     |        |           |          |       |     |        |          | 185->186 | 9.53  |
|     |        |           |          |       |     |        |          | 185->187 | 84.17 |

**Table S6. 3P** – molecular orbitals energy and contributions.

|            | 156                | 157                | 158               | 159                | 160               | 161                | 162                | 163               | 164                |
|------------|--------------------|--------------------|-------------------|--------------------|-------------------|--------------------|--------------------|-------------------|--------------------|
| Energy:    | (A)--O<br>-0.30203 | (A)--O<br>-0.29543 | (A)--O<br>-0.2718 | (A)--O<br>-0.26143 | (A)--O<br>-0.2579 | (A)--O<br>-0.25674 | (A)--O<br>-0.25526 | (A)--O<br>-0.2521 | (A)--O<br>-0.24552 |
| %          |                    |                    |                   |                    |                   |                    |                    |                   |                    |
| Cu:        | 0.7                | 29.5               | 2.7               | 32.6               | 6.8               | 16.5               | 34.0               | 7.4               | 87.7               |
| I:         | 0.1                | 0.3                | 0.1               | 6.2                | 1.2               | 4.0                | 12.2               | 0.6               | 2.8                |
| phosphine: | 98.7               | 65.6               | 0.3               | 25.6               | 59.3              | 79.1               | 41.5               | 90.7              | 6.1                |
| dmp:       | 0.5                | 4.5                | 97.0              | 35.6               | 32.7              | 0.3                | 12.4               | 1.3               | 3.4                |

  

|          | 165      | 166      | 167      | 168      | 169      | 170     | 171      | 172      | 173      | 174      | 175    |
|----------|----------|----------|----------|----------|----------|---------|----------|----------|----------|----------|--------|
| (A)--O   | (A)--O   | (A)--O   | (A)--O   | (A)--O   | (A)--O   | (A)--O  | (A)--O   | (A)--O   | (A)--O   | (A)--V   | (A)--V |
| -0.24518 | -0.23136 | -0.22665 | -0.21927 | -0.21705 | -0.21166 | -0.1858 | -0.18019 | -0.17623 | -0.08169 | -0.08032 |        |
| 84.0     | 20.0     | 42.4     | 48.8     | 20.3     | 10.7     | 32.4    | 14.6     | 19.0     | 2.4      | 0.4      |        |
| 2.0      | 0.7      | 6.4      | 4.9      | 2.4      | 1.3      | 51.5    | 79.5     | 65.7     | 1.2      | 0.2      |        |
| 10.6     | 77.7     | 43.5     | 35.3     | 72.2     | 85.2     | 10.8    | 1.2      | 13.7     | 1.3      | 0.6      |        |
| 3.5      | 1.6      | 7.7      | 11.0     | 5.1      | 2.7      | 5.3     | 4.7      | 1.7      | 95.1     | 98.8     |        |

  

|          | 176      | 177     | 178     | 179    | 180 |
|----------|----------|---------|---------|--------|-----|
| (A)--V   | (A)--V   | (A)--V  | (A)--V  | (A)--V |     |
| -0.03505 | -0.00695 | 0.01567 | 0.03083 | 0.038  |     |
| 2.8      | 0.7      | 39.8    | 61.7    | 6.8    |     |
| 0.6      | 0.2      | 4.4     | 5.5     | 1.4    |     |
| 2.8      | 1.8      | 38.7    | 24.1    | 6.3    |     |
| 93.9     | 97.3     | 17.1    | 8.7     | 85.5   |     |

**Fig S11. 3P UV-VIS spectrum** (blue lines – singlet transitions; red lines – triplet transitions)

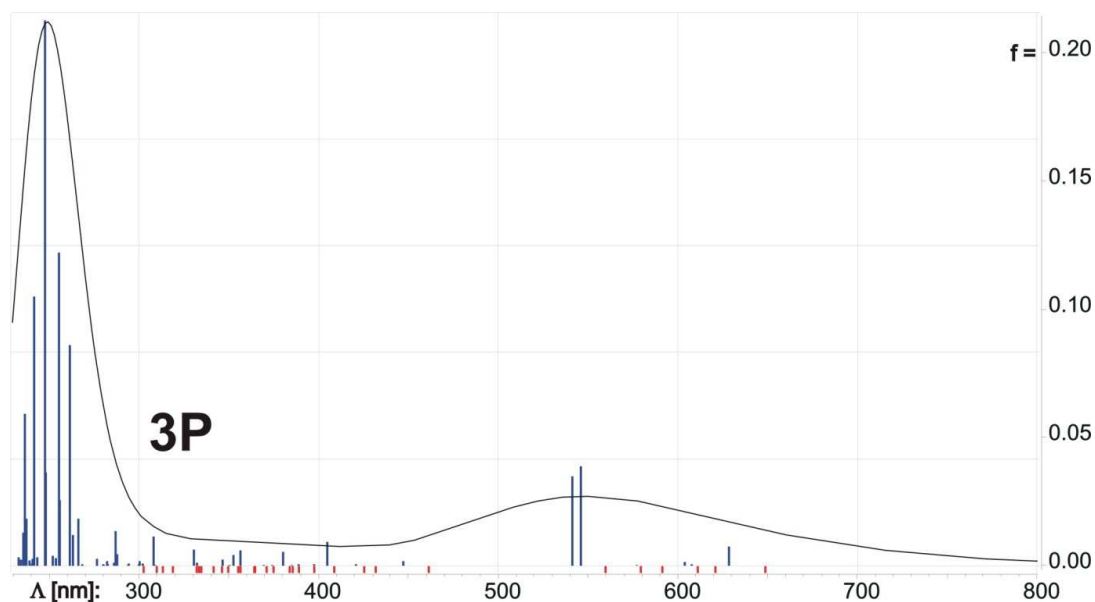

| No: | $\lambda$ [nm] | osc. str. | Orbitals | %     | S4: 577.03 | f=0.0004 | 172->174 | 10.28 | T2: 620.83 | f=0.0000 | 172->174 | 79.12 |
|-----|----------------|-----------|----------|-------|------------|----------|----------|-------|------------|----------|----------|-------|
| S1: | 628.66         | f=0.0074  | 171->174 | 2.49  |            |          | 172->175 | 89.72 |            |          | 172->175 | 12.50 |
|     |                |           | 173->174 | 91.34 | S5: 545.92 | f=0.0388 | 171->174 | 81.66 |            |          | 173->174 | 3.07  |
|     |                |           | 173->175 | 6.17  |            |          | 171->175 | 18.34 |            |          | 173->175 | 5.31  |
| S2: | 607.87         | f=0.0007  | 172->174 | 86.23 | S6: 541.21 | f=0.0349 | 171->174 | 14.53 | T3: 611.14 | f=0.0000 | 171->175 | 5.34  |
|     |                |           | 172->175 | 9.56  |            |          | 171->175 | 85.47 |            |          | 172->175 | 2.55  |
|     |                |           | 173->175 | 4.21  | T1: 648.83 | f=0.0000 | 171->174 | 3.27  |            |          | 173->174 | 5.88  |
| S3: | 603.90         | f=0.0014  | 172->174 | 3.35  |            |          | 172->174 | 3.70  |            |          | 173->175 | 86.22 |
|     |                |           | 173->174 | 6.28  |            |          | 173->174 | 88.52 |            |          |          |       |
|     |                |           | 173->175 | 90.37 |            |          | 173->175 | 4.51  |            |          |          |       |

**Table S7. 4P** – molecular orbitals energy and contributions.

|            | 136               | 137                | 138                | 139                | 140                | 141                | 142                | 143                | 144                |
|------------|-------------------|--------------------|--------------------|--------------------|--------------------|--------------------|--------------------|--------------------|--------------------|
| Energy:    | (A)--O<br>-0.3041 | (A)--O<br>-0.26517 | (A)--O<br>-0.26148 | (A)--O<br>-0.25886 | (A)--O<br>-0.25689 | (A)--O<br>-0.25427 | (A)--O<br>-0.25167 | (A)--O<br>-0.24984 | (A)--O<br>-0.24781 |
| %          |                   |                    |                    |                    |                    |                    |                    |                    |                    |
| Cu:        | 25.8              | 2.8                | 3.0                | 6.8                | 7.9                | 27.1               | 7.0                | 52.8               | 9.1                |
| I:         | 0.5               | 0.1                | 0.5                | 0.2                | 0.1                | 5.1                | 2.6                | 17.7               | 1.6                |
| phosphine: | 59.1              | 1.5                | 94.4               | 91.3               | 83.9               | 18.6               | 86.1               | 9.2                | 83.3               |
| dmp:       | 14.6              | 95.7               | 2.1                | 1.8                | 8.1                | 49.2               | 4.3                | 20.3               | 6.0                |

  

|            | 145                | 146                | 147                | 148               | 149                | 150                | 151                | 152               | 153                | 154                | 155                |
|------------|--------------------|--------------------|--------------------|-------------------|--------------------|--------------------|--------------------|-------------------|--------------------|--------------------|--------------------|
| Energy:    | (A)--O<br>-0.24507 | (A)--O<br>-0.23867 | (A)--O<br>-0.23607 | (A)--O<br>-0.2142 | (A)--O<br>-0.21152 | (A)--O<br>-0.18205 | (A)--O<br>-0.17388 | (A)--O<br>-0.1691 | (A)--V<br>-0.07454 | (A)--V<br>-0.07389 | (A)--V<br>-0.02853 |
| %          |                    |                    |                    |                   |                    |                    |                    |                   |                    |                    |                    |
| Cu:        | 16.6               | 89.7               | 89.9               | 58.9              | 70.4               | 36.2               | 15.1               | 17.4              | 2.5                | 0.2                | 4.2                |
| I:         | 0.5                | 3.0                | 1.8                | 9.2               | 5.4                | 47.9               | 79.4               | 71.6              | 1.4                | 0.1                | 0.5                |
| phosphine: | 78.1               | 4.0                | 4.2                | 22.7              | 6.6                | 10.0               | 0.8                | 9.1               | 1.0                | 0.2                | 16.9               |
| dmp:       | 4.8                | 3.2                | 4.1                | 9.2               | 17.5               | 5.9                | 4.7                | 1.9               | 95.1               | 99.5               | 78.4               |

  

|            | 156               | 157                | 158                | 159                | 160                |
|------------|-------------------|--------------------|--------------------|--------------------|--------------------|
| Energy:    | (A)--V<br>-0.0259 | (A)--V<br>-0.02257 | (A)--V<br>-0.01343 | (A)--V<br>-0.00714 | (A)--V<br>-0.00082 |
| %          |                   |                    |                    |                    |                    |
| Cu:        | 1.2               | 1.5                | 5.0                | 5.2                | 2.0                |
| I:         | 0.4               | 0.4                | 0.2                | 1.5                | 0.3                |
| phosphine: | 85.7              | 95.9               | 92.0               | 91.6               | 74.9               |
| dmp:       | 12.8              | 2.2                | 2.8                | 1.8                | 22.8               |

**Fig S12. 4P UV-VIS spectrum** (blue lines – singlet transitions; red lines – triplet transitions)

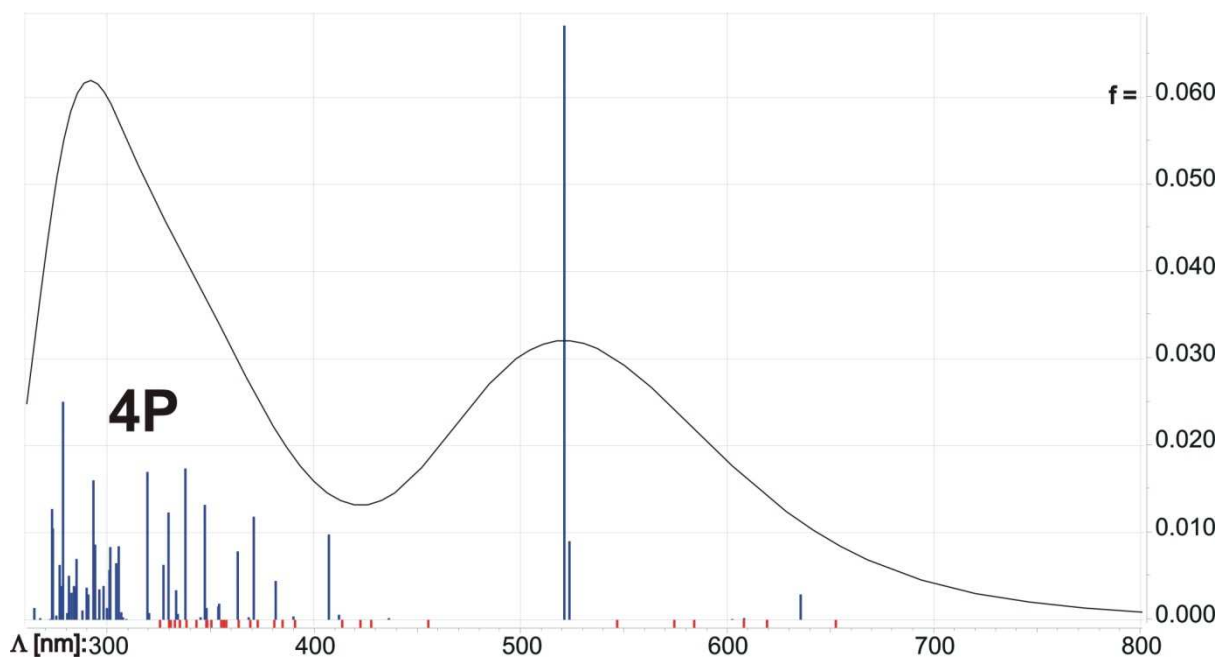

| No: | $\lambda$ [nm] | osc. str. | Orbitals | %      |     |        |          |          |        |
|-----|----------------|-----------|----------|--------|-----|--------|----------|----------|--------|
| S5: | 523.54         | f=0.0090  | 150->153 | 11.59  | T1: | 652.70 | f=0.0000 | 152->153 | 100.00 |
| S1: | 635.48         | f=0.0029  | 152->153 | 100.00 | T2: | 619.63 | f=0.0000 | 149->153 | 3.01   |
| S2: | 608.33         | f=0.0002  | 151->153 | 7.72   | S6: | 520.99 | f=0.0682 | 150->153 | 87.52  |
|     |                |           | 152->154 | 92.28  |     |        |          | 150->154 | 12.48  |
| S3: | 602.57         | f=0.0001  | 151->153 | 91.83  | S7: | 436.31 | f=0.0002 | 148->153 | 9.07   |
|     |                |           | 152->154 | 8.17   |     |        |          | 149->153 | 88.71  |
| S4: | 574.44         | f=0.0000  | 151->154 | 100.00 |     |        |          | 149->154 | 2.22   |
|     |                |           |          |        |     |        |          | 152->154 | 85.64  |

**Fig S13. 1N** - selected orbitals

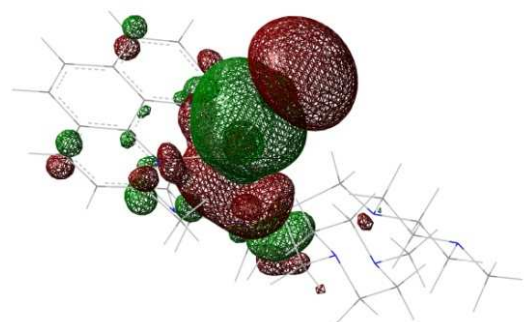

**191**

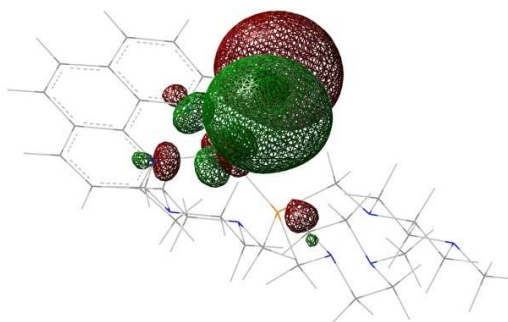

**192**

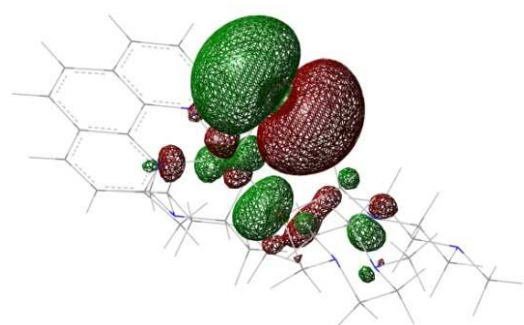

**193 - HOMO**

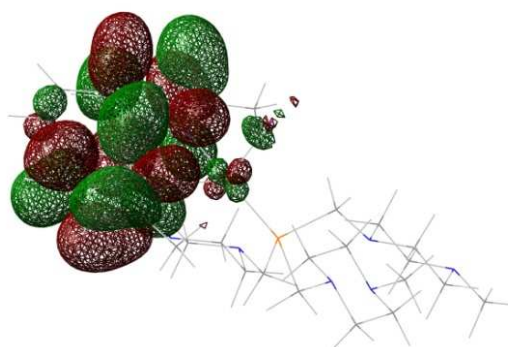

**194 - LUMO**

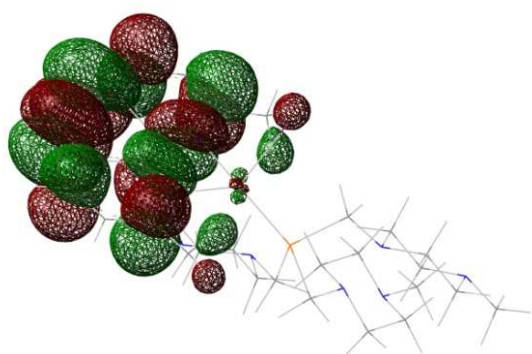

**195**

**Fig S14. 3N** - selected orbitals

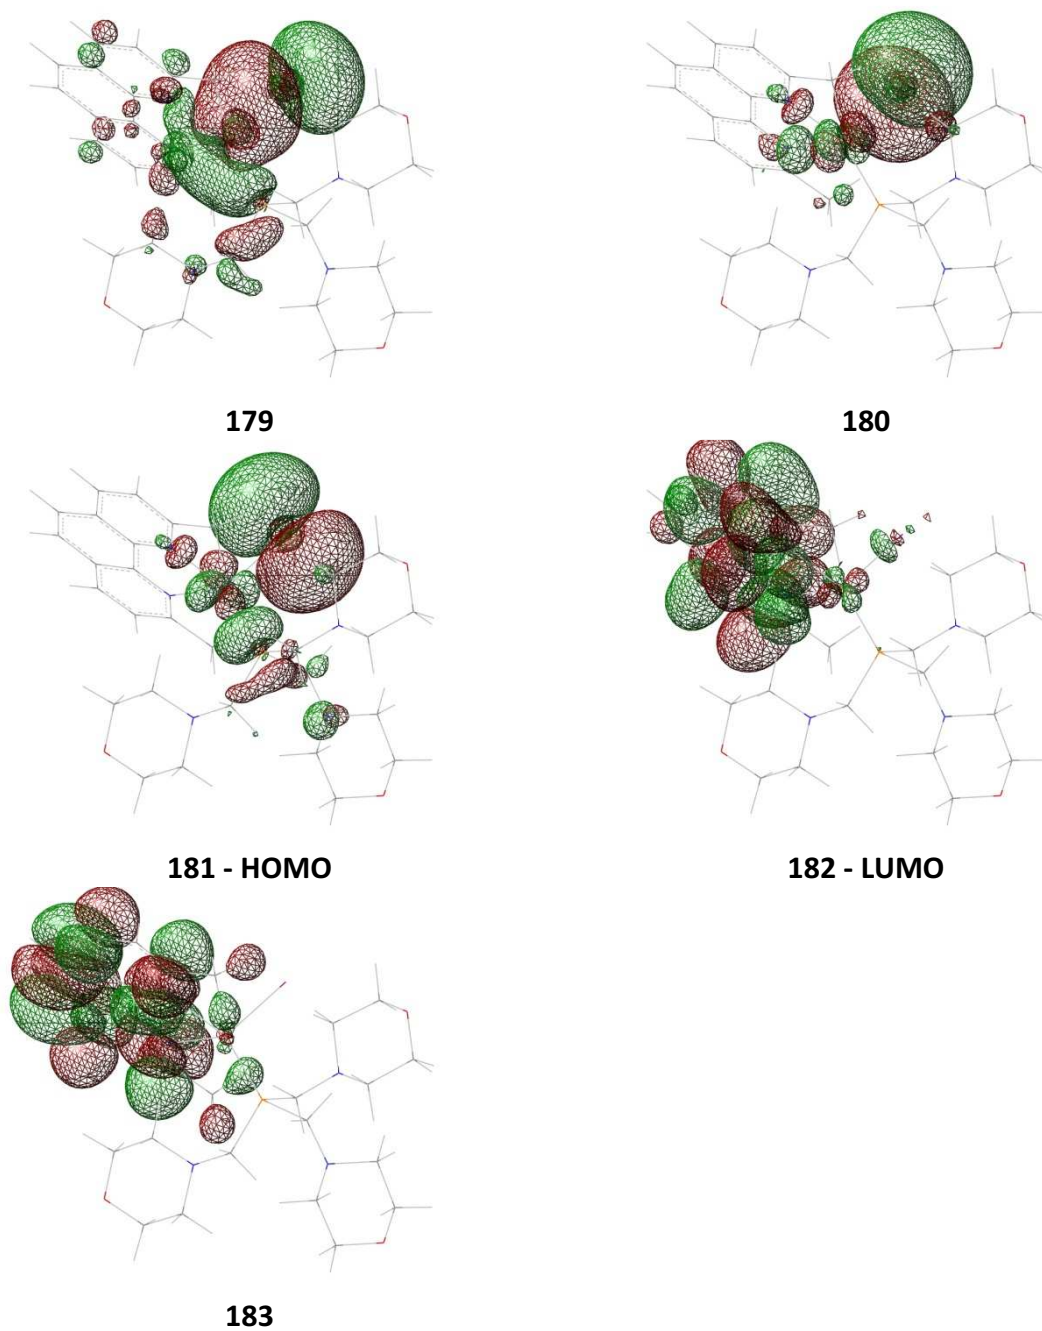

**Fig S15. 4N** - selected orbitals

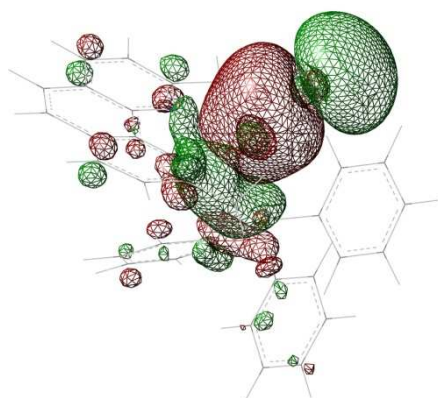

**158**

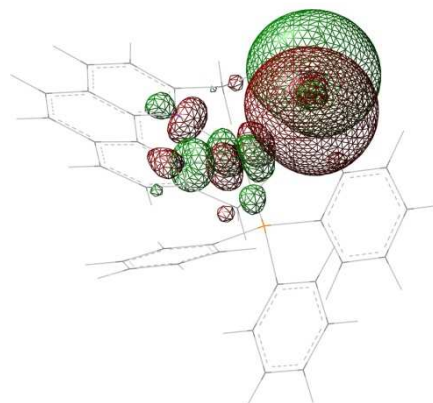

**159**

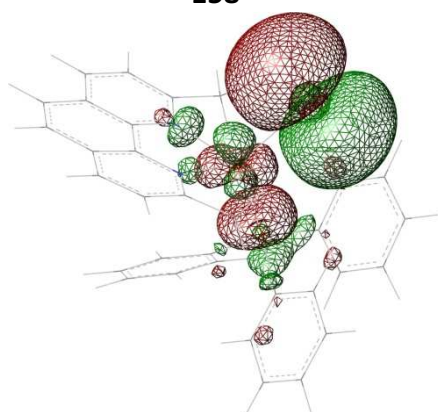

**160 - HOMO**

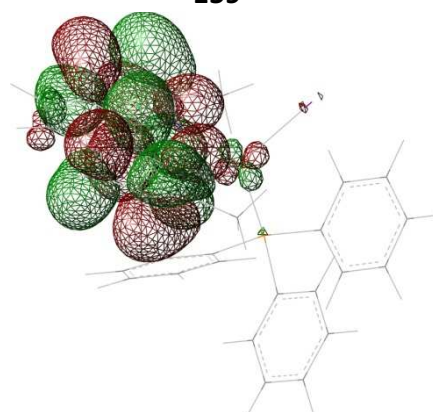

**161 - LUMO**

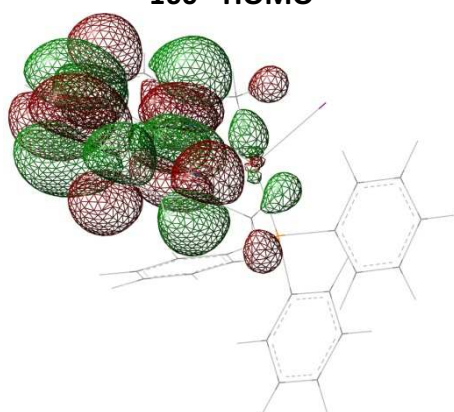

**162**

**Fig S16. 1P** - selected orbitals

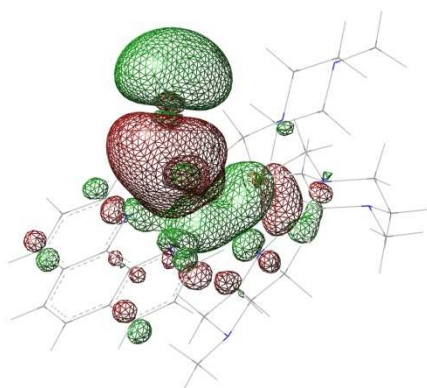

**183**

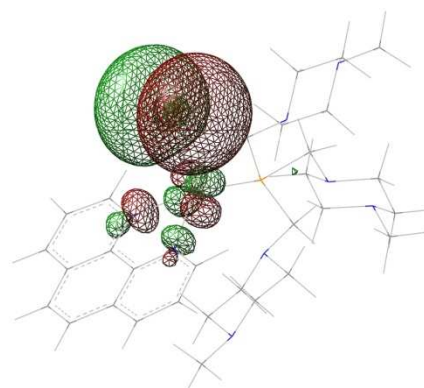

**184**

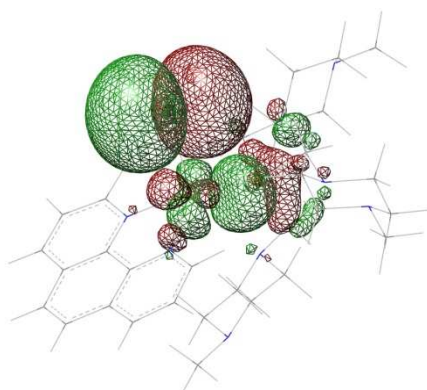

**185 - HOMO**

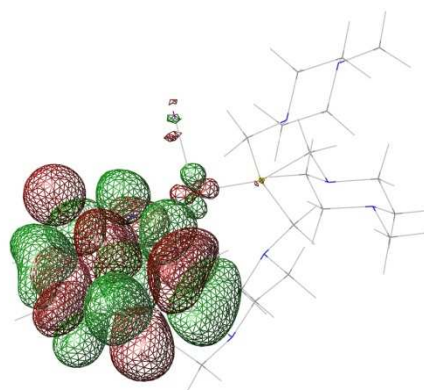

**186 - LUMO**

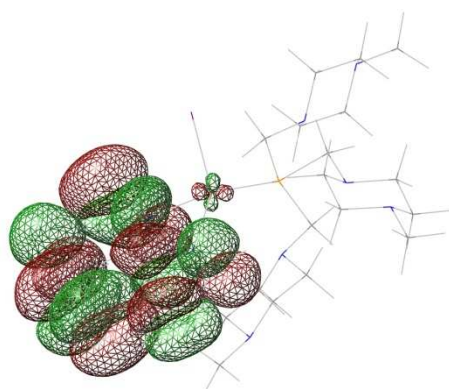

**187**

**Fig S17. 3P** - selected orbitals

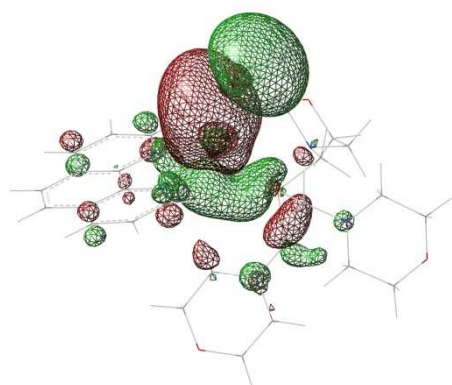

**171**

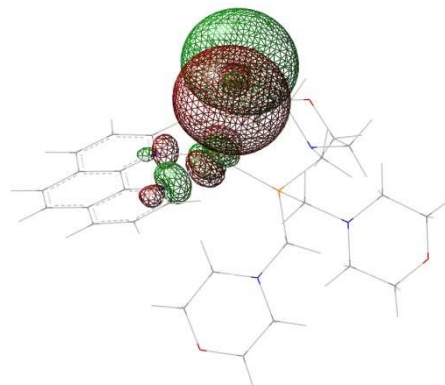

**172**

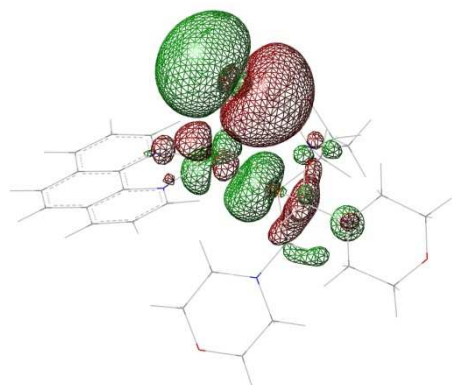

**173 - HOMO**

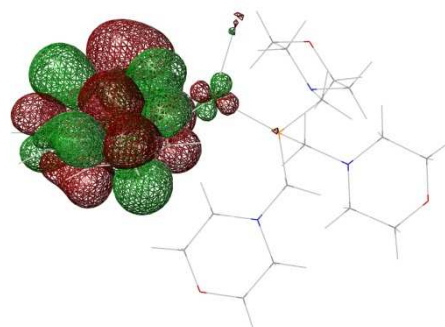

**174 - LUMO**

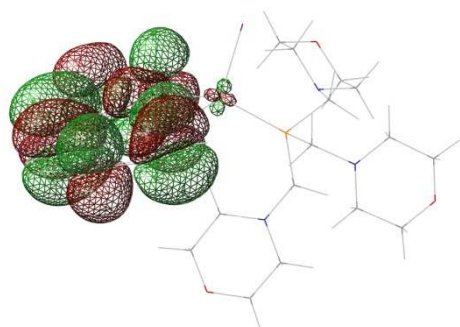

**175**



**Fig S18. 4P** - selected orbitals

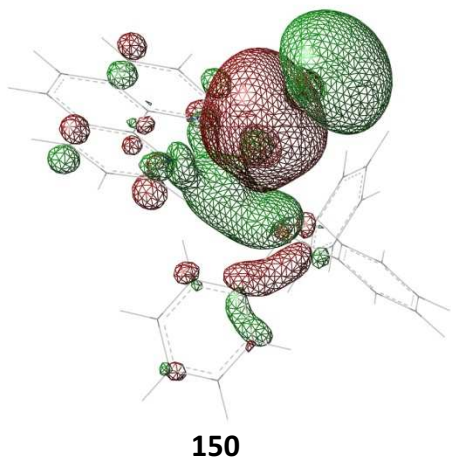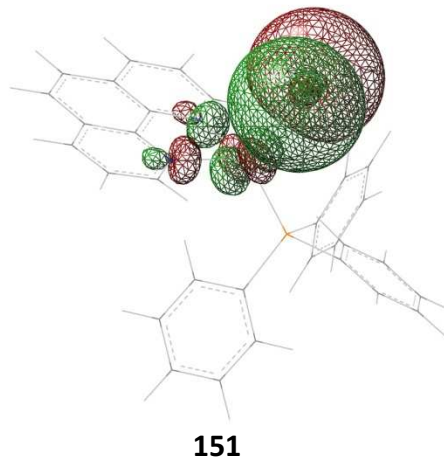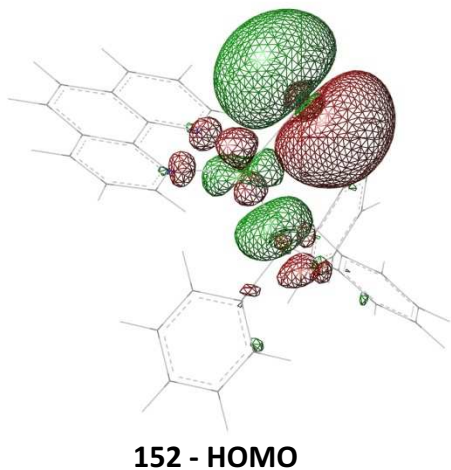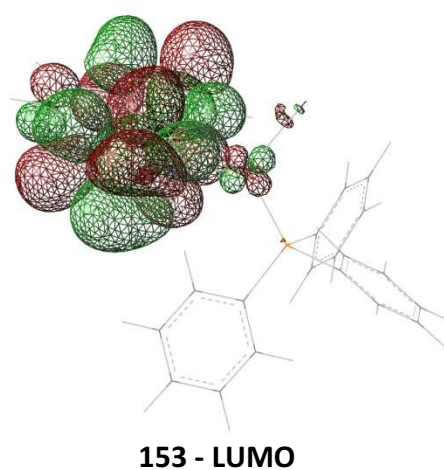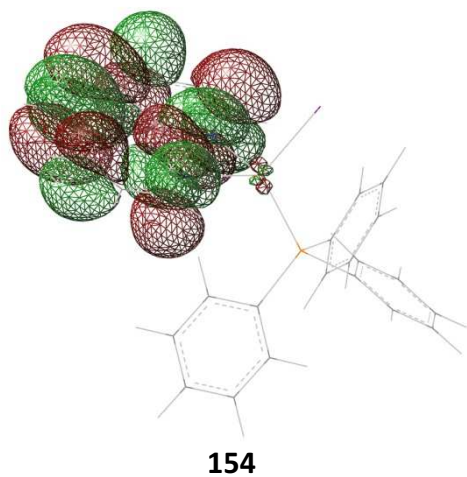

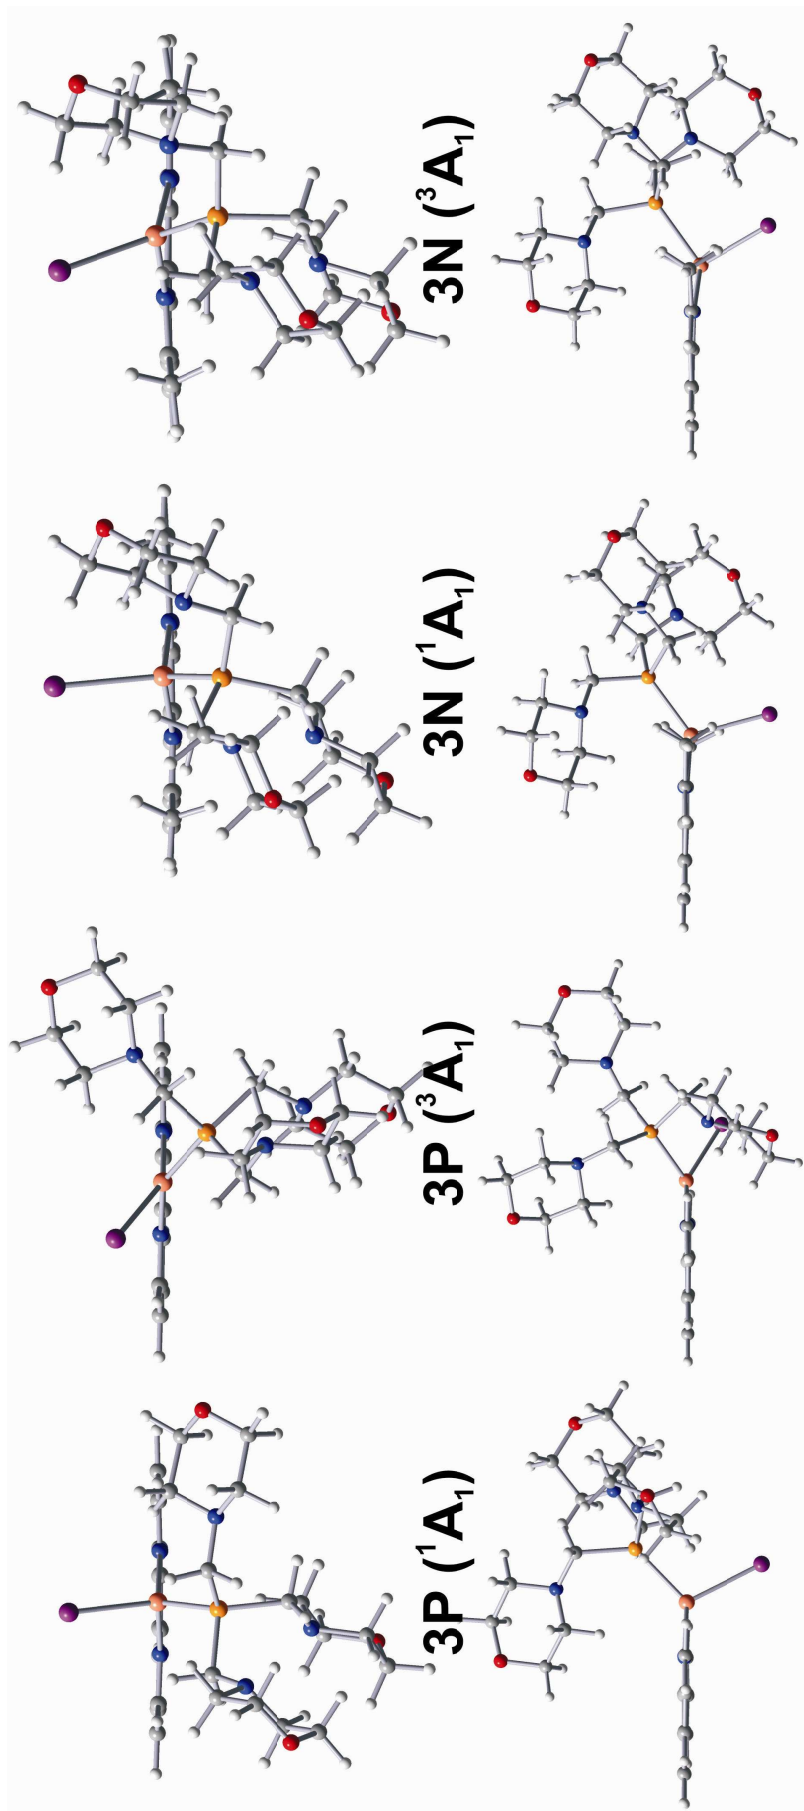

Fig. S19 Molecular structures of **3P** and **3N** in the singlet and triplet states calculated with DFT methods.

| Transition: $\lambda$ [nm]<br>oscillator strength) | Orbitals<br>involved | %      |             | 182->194 13.83  |             | 187->195 76.82  |
|----------------------------------------------------|----------------------|--------|-------------|-----------------|-------------|-----------------|
| <b>1N</b>                                          |                      |        |             | 184->194 42.81  | S25: 332.59 |                 |
| S1: 564.17 f=0.0021                                |                      |        |             | 185->194 6.89   | f=0.0001    |                 |
|                                                    | 193->194             | 100.00 |             | 186->194 22.90  |             | 181->194 2.68   |
| S2: 544.91 f=0.0005                                |                      |        | S15: 350.46 | 188->194 13.58  |             | 182->194 2.76   |
|                                                    | 192->194             | 100.00 | f=0.0003    |                 |             | 183->194 77.37  |
| S3: 523.96 f=0.0006                                |                      |        |             | 184->194 4.31   |             | 184->195 9.85   |
|                                                    | 193->195             | 100.00 |             | 185->194 86.02  |             | 184->195 2.78   |
| S4: 506.47 f=0.0274                                |                      |        |             | 185->195 7.04   | S26: 329.37 | 191->196 4.56   |
|                                                    | 191->194             | 59.27  |             | 186->194 2.63   | f=0.0208    |                 |
|                                                    | 192->195             | 40.73  | S16: 347.60 |                 |             | 182->194 8.23   |
| S5: 501.30 f=0.0353                                |                      |        | f=0.0011    |                 |             | 183->194 8.56   |
|                                                    | 191->194             | 37.38  |             | 193->196 100.00 |             | 191->196 83.22  |
|                                                    | 192->195             | 62.62  | S17: 345.91 |                 | S27: 320.20 |                 |
| S6: 487.22 f=0.0072                                |                      |        | f=0.0001    |                 | f=0.0029    |                 |
|                                                    | 191->195             | 100.00 |             | 184->195 4.84   |             | 183->195 96.00  |
| S7: 424.01 f=0.0010                                |                      |        |             | 186->195 50.23  |             | 184->195 4.00   |
|                                                    | 186->194             | 19.62  |             | 187->195 14.91  | S28: 315.48 |                 |
|                                                    | 187->194             | 5.11   |             | 189->195 26.28  | f=0.0053    |                 |
|                                                    | 188->194             | 23.89  |             | 193->196 3.73   |             | 178->195 3.39   |
|                                                    | 189->194             | 46.39  | S18: 344.45 |                 |             | 180->194 40.96  |
|                                                    | 190->194             | 2.86   | f=0.0001    |                 |             | 181->195 55.65  |
|                                                    | 192->194             | 2.13   |             | 184->194 2.59   | S29: 313.91 |                 |
| S8: 392.28 f=0.0019                                |                      |        |             | 186->194 11.64  | f=0.0042    |                 |
|                                                    | 183->194             | 2.65   |             | 187->194 85.77  |             | 180->195 10.62  |
|                                                    | 184->194             | 8.16   | S19: 339.65 |                 |             | 182->195 86.91  |
|                                                    | 186->195             | 11.42  | f=0.0013    |                 |             | 184->195 2.47   |
|                                                    | 187->195             | 3.15   |             | 181->194 8.48   | S30: 304.93 |                 |
|                                                    | 188->194             | 14.46  |             | 192->196 91.52  | f=0.0162    |                 |
|                                                    | 188->195             | 19.07  | S20: 339.15 |                 |             | 178->195 11.35  |
|                                                    | 189->194             | 7.35   | f=0.0017    |                 |             | 180->194 37.91  |
|                                                    | 189->195             | 31.17  |             | 184->195 27.81  |             | 181->195 45.54  |
|                                                    | 190->195             | 2.56   |             | 185->194 4.41   |             | 182->194 5.19   |
| S9: 389.45 f=0.0068                                |                      |        |             | 185->195 57.29  | S31: 295.57 |                 |
|                                                    | 183->194             | 3.95   |             | 186->195 6.10   | f=0.0173    |                 |
|                                                    | 184->194             | 13.51  |             | 188->195 4.39   |             | 178->194 14.96  |
|                                                    | 186->195             | 5.96   | S21: 337.89 |                 |             | 179->194 31.51  |
|                                                    | 188->194             | 34.53  | f=0.0002    |                 |             | 180->195 50.87  |
|                                                    | 188->195             | 7.81   |             | 183->194 2.74   |             | 182->195 2.66   |
|                                                    | 189->194             | 9.91   |             | 184->195 34.18  | S32: 294.68 |                 |
|                                                    | 189->195             | 19.47  |             | 185->194 3.08   | f=0.0117    |                 |
|                                                    | 190->194             | 4.86   |             | 185->195 38.10  |             | 178->194 9.77   |
| S10: 373.15<br>f=0.0001                            |                      |        |             | 186->195 11.86  |             | 179->194 71.29  |
|                                                    |                      |        |             | 187->195 7.01   |             | 180->195 18.95  |
|                                                    | 188->194             | 8.34   |             | 188->195 3.03   | S33: 289.48 |                 |
|                                                    | 190->194             | 91.66  | S22: 336.00 |                 | f=0.0005    |                 |
| S11: 367.81<br>f=0.0010                            |                      |        | f=0.0021    |                 |             | 193->197 100.00 |
|                                                    |                      |        |             | 180->194 3.81   | S34: 285.39 |                 |
|                                                    | 183->195             | 3.44   |             | 181->194 21.16  | f=0.0011    |                 |
|                                                    | 184->195             | 12.18  |             | 182->194 48.78  |             | 186->196 18.13  |
|                                                    | 188->195             | 48.82  |             | 183->194 3.11   |             | 187->196 4.94   |
|                                                    | 189->195             | 23.98  |             | 184->194 5.93   |             | 188->196 25.02  |
|                                                    | 190->195             | 11.58  |             | 186->194 2.72   |             | 189->196 48.56  |
| S12: 360.46<br>f=0.0003                            |                      |        |             | 188->194 2.25   |             | 190->196 3.36   |
|                                                    |                      |        |             | 191->196 12.24  | S35: 284.42 |                 |
|                                                    | 184->194             | 10.75  | S23: 334.47 |                 | f=0.0003    |                 |
|                                                    | 186->194             | 40.24  | f=0.0004    |                 |             | 179->195 93.25  |
|                                                    | 187->194             | 11.26  |             | 181->194 69.43  |             | 191->197 3.36   |
|                                                    | 189->194             | 37.74  |             | 182->194 16.19  |             | 192->197 3.39   |
| S13: 359.03<br>f=0.0001                            |                      |        |             | 184->194 3.55   | S36: 283.32 |                 |
|                                                    |                      |        |             | 192->196 10.83  | f=0.0004    |                 |
|                                                    | 188->195             | 15.22  | S24: 333.31 |                 |             | 179->195 3.72   |
|                                                    | 190->195             | 84.78  | f=0.0000    |                 |             | 192->197 96.28  |
| S14: 355.69<br>f=0.0016                            |                      |        |             | 184->195 12.56  | S37: 279.44 |                 |
|                                                    |                      |        |             | 186->195 10.62  | f=0.0005    |                 |

|                         |          |       |                         |          |       |                         |          |       |
|-------------------------|----------|-------|-------------------------|----------|-------|-------------------------|----------|-------|
|                         | 178->194 | 4.01  |                         | 193->198 | 2.92  | S56: 236.74             |          |       |
|                         | 191->197 | 95.99 |                         | 193->199 | 6.41  | f=0.0037                |          |       |
| S38: 271.45<br>f=0.0114 |          |       | S46: 254.78<br>f=0.0039 |          |       |                         | 172->194 | 4.67  |
|                         |          |       |                         |          |       |                         | 177->194 | 95.33 |
|                         | 183->196 | 4.80  |                         | 182->196 | 2.72  | S57: 235.70             |          |       |
|                         | 184->196 | 13.81 |                         | 184->196 | 50.13 | f=0.0512                |          |       |
|                         | 186->196 | 2.38  |                         | 185->196 | 15.10 |                         | 193->200 | 90.31 |
|                         | 188->196 | 48.95 |                         | 186->196 | 15.52 |                         | 193->201 | 6.26  |
|                         | 189->196 | 20.89 |                         | 188->196 | 9.77  |                         | 193->204 | 3.44  |
|                         | 190->196 | 9.16  |                         | 193->199 | 6.76  | S58: 235.19<br>f=0.0005 |          |       |
| S39: 266.27<br>f=0.0167 |          |       | S47: 253.75<br>f=0.0045 |          |       |                         | 175->194 | 3.94  |
|                         | 178->194 | 4.20  |                         | 184->196 | 6.11  |                         | 176->194 | 3.03  |
|                         | 178->195 | 2.29  |                         | 185->196 | 84.58 |                         | 183->197 | 5.18  |
|                         | 190->196 | 3.54  |                         | 186->196 | 3.03  |                         | 184->197 | 16.24 |
|                         | 191->198 | 2.48  |                         | 193->199 | 6.28  |                         | 186->197 | 2.87  |
|                         | 193->198 | 84.25 | S48: 253.50<br>f=0.0331 |          |       |                         | 188->197 | 42.61 |
|                         | 193->199 | 3.24  |                         |          |       |                         | 189->197 | 19.68 |
| S40: 265.55<br>f=0.0188 |          |       |                         | 184->196 | 9.00  |                         | 190->197 | 6.46  |
|                         |          |       |                         | 185->196 | 3.00  | S59: 231.41<br>f=0.0033 |          |       |
|                         | 178->195 | 9.57  |                         | 192->198 | 11.53 |                         |          |       |
|                         | 188->196 | 9.16  |                         | 192->199 | 3.52  |                         | 172->195 | 2.84  |
|                         | 190->196 | 76.52 |                         | 193->198 | 3.52  |                         | 175->194 | 19.52 |
|                         | 193->198 | 4.75  |                         | 193->199 | 69.43 |                         | 176->194 | 18.41 |
| S41: 265.28<br>f=0.0696 |          |       | S49: 250.89<br>f=0.0008 |          |       |                         | 177->195 | 26.17 |
|                         |          |       |                         |          |       |                         | 192->200 | 22.98 |
|                         | 178->195 | 56.11 |                         | 184->196 | 9.04  |                         | 192->201 | 2.94  |
|                         | 180->194 | 6.66  |                         | 186->196 | 10.47 |                         | 193->201 | 7.15  |
|                         | 180->196 | 11.37 |                         | 187->196 | 80.48 | S60: 231.20<br>f=0.0243 |          |       |
|                         | 182->196 | 5.91  | S50: 247.46<br>f=0.0082 |          |       |                         | 175->194 | 11.22 |
|                         | 188->196 | 5.16  |                         |          |       |                         | 176->194 | 5.43  |
|                         | 190->196 | 14.78 |                         | 192->199 | 97.56 |                         | 177->195 | 9.74  |
| S42: 261.37<br>f=0.3118 |          |       |                         | 193->199 | 2.44  |                         | 192->200 | 65.30 |
|                         |          |       | S51: 246.27<br>f=0.0119 |          |       |                         | 192->201 | 4.73  |
|                         | 178->194 | 52.29 |                         |          |       |                         | 192->204 | 3.58  |
|                         | 178->196 | 4.37  |                         | 177->194 | 3.55  |                         |          |       |
|                         | 180->195 | 12.60 |                         | 186->197 | 11.26 | T1: 572.23 f=0.0000     |          |       |
|                         | 181->196 | 8.25  |                         | 187->197 | 3.00  |                         | 192->194 | 5.09  |
|                         | 182->195 | 3.47  |                         | 188->197 | 14.96 |                         | 193->194 | 94.91 |
|                         | 186->196 | 3.57  |                         | 189->197 | 28.18 | T2: 557.84 f=0.0000     |          |       |
|                         | 191->198 | 10.49 |                         | 191->199 | 39.03 |                         | 191->194 | 17.89 |
|                         | 193->198 | 4.96  | S52: 244.84<br>f=0.0214 |          |       |                         | 192->194 | 74.65 |
| S43: 258.75<br>f=0.0078 |          |       |                         |          |       |                         | 192->195 | 2.10  |
|                         |          |       |                         | 183->196 | 10.02 |                         | 193->194 | 5.36  |
|                         | 184->196 | 2.44  |                         | 186->197 | 8.30  | T3: 546.11 f=0.0000     |          |       |
|                         | 186->196 | 13.33 |                         | 188->197 | 12.40 |                         | 191->194 | 83.55 |
|                         | 187->196 | 3.70  |                         | 189->197 | 20.66 |                         | 192->194 | 16.45 |
|                         | 189->196 | 9.02  |                         | 191->198 | 3.17  | T4: 526.64 f=0.0000     |          |       |
|                         | 191->198 | 16.30 |                         | 191->199 | 45.45 |                         | 191->195 | 3.78  |
|                         | 191->199 | 2.43  | S53: 243.85<br>f=0.0076 |          |       |                         | 193->195 | 96.22 |
|                         | 192->198 | 49.50 |                         |          |       | T5: 510.08 f=0.0000     |          |       |
|                         | 193->199 | 3.28  |                         | 182->196 | 3.83  |                         | 180->195 | 3.60  |
| S44: 258.39<br>f=0.0344 |          |       |                         | 183->196 | 82.30 |                         | 191->195 | 45.67 |
|                         |          |       |                         | 184->196 | 4.99  |                         | 192->194 | 3.27  |
|                         | 178->194 | 3.72  |                         | 191->199 | 8.88  |                         | 192->195 | 42.78 |
|                         | 184->196 | 4.21  | S54: 241.52<br>f=0.0025 |          |       |                         | 193->195 | 4.68  |
|                         | 186->196 | 35.75 |                         |          |       | T6: 503.65 f=0.0000     |          |       |
|                         | 187->196 | 9.69  |                         | 180->196 | 15.91 |                         | 180->195 | 2.39  |
|                         | 189->196 | 22.52 |                         | 181->196 | 6.00  |                         | 191->195 | 43.77 |
|                         | 191->198 | 3.31  |                         | 182->196 | 72.57 |                         | 192->195 | 53.84 |
|                         | 192->198 | 17.76 |                         | 183->196 | 2.89  | T7: 435.02 f=0.0000     |          |       |
|                         | 193->199 | 3.04  |                         | 184->196 | 2.63  |                         | 180->195 | 5.16  |
| S45: 257.26<br>f=0.0168 |          |       | S55: 239.51<br>f=0.0695 |          |       |                         | 186->194 | 18.85 |
|                         |          |       |                         |          |       |                         | 187->194 | 4.77  |
|                         | 191->198 | 68.15 |                         | 181->196 | 95.46 |                         | 188->194 | 22.24 |
|                         | 192->198 | 22.52 |                         | 182->196 | 4.54  |                         | 189->194 | 40.87 |

|             |          |          |             |          |       |             |          |        |
|-------------|----------|----------|-------------|----------|-------|-------------|----------|--------|
|             | 190->194 | 2.40     |             | 186->194 | 31.52 |             | 184->195 | 7.19   |
|             | 191->195 | 2.18     |             | 187->194 | 8.31  |             | 185->194 | 4.45   |
|             | 192->194 | 3.53     |             | 189->194 | 33.26 |             | 185->195 | 47.17  |
| T8: 429.23  |          | f=0.0000 | T15: 359.11 |          |       |             | 191->196 | 7.09   |
|             | 176->194 | 3.10     | f=0.0000    |          |       |             | 192->196 | 31.18  |
|             | 178->194 | 10.83    |             | 188->195 | 13.40 | T24: 338.54 |          |        |
|             | 178->196 | 3.62     |             | 190->195 | 86.60 | f=0.0000    |          |        |
|             | 179->195 | 2.59     | T16: 355.09 |          |       |             | 184->195 | 39.09  |
|             | 180->195 | 42.70    | f=0.0000    |          |       |             | 186->195 | 14.81  |
|             | 181->194 | 3.88     |             | 178->194 | 14.69 |             | 188->195 | 6.36   |
|             | 182->195 | 18.48    |             | 180->194 | 6.71  |             | 191->196 | 28.99  |
|             | 183->195 | 4.20     |             | 180->195 | 2.83  |             | 192->196 | 10.74  |
|             | 186->194 | 2.29     |             | 181->194 | 11.16 | T25: 337.76 |          |        |
|             | 189->194 | 3.13     |             | 184->194 | 33.60 | f=0.0000    |          |        |
|             | 191->195 | 5.18     |             | 185->194 | 10.52 |             | 184->195 | 18.92  |
| T9: 399.17  |          | f=0.0000 |             | 186->194 | 7.72  |             | 185->194 | 3.89   |
|             | 183->194 | 3.37     |             | 188->194 | 12.77 |             | 185->195 | 38.36  |
|             | 184->194 | 9.14     | T17: 354.28 |          |       |             | 186->195 | 5.04   |
|             | 186->195 | 12.65    | f=0.0000    |          |       |             | 187->195 | 5.49   |
|             | 187->195 | 3.32     |             | 178->194 | 17.92 |             | 191->196 | 19.56  |
|             | 188->194 | 14.20    |             | 180->194 | 2.49  |             | 192->196 | 8.74   |
|             | 188->195 | 17.60    |             | 180->195 | 5.50  | T26: 334.03 |          |        |
|             | 189->194 | 7.68     |             | 181->194 | 14.05 | f=0.0000    |          |        |
|             | 189->195 | 29.88    |             | 182->194 | 3.51  |             | 180->194 | 14.62  |
|             | 190->195 | 2.18     |             | 184->194 | 12.29 |             | 181->194 | 5.25   |
| T10: 393.14 |          | f=0.0000 |             | 185->194 | 7.81  |             | 182->194 | 46.27  |
|             | 180->194 | 3.13     |             | 185->195 | 2.64  |             | 183->194 | 19.59  |
|             | 183->194 | 7.08     |             | 186->194 | 24.45 |             | 184->194 | 14.26  |
|             | 184->194 | 12.23    |             | 188->194 | 5.32  | T27: 333.34 |          |        |
|             | 186->195 | 6.29     |             | 189->194 | 4.01  | f=0.0000    |          |        |
|             | 188->194 | 32.43    | T18: 349.54 |          |       |             | 184->195 | 13.31  |
|             | 188->195 | 8.12     | f=0.0000    | 178->194 | 2.96  |             | 186->195 | 8.81   |
|             | 189->194 | 7.08     |             | 181->194 | 7.76  |             | 187->195 | 75.64  |
|             | 189->195 | 19.92    |             | 185->194 | 57.45 | T28: 330.04 | 188->195 | 2.24   |
|             | 190->194 | 3.72     |             | 185->195 | 3.07  | f=0.0000    |          |        |
| T11: 374.18 |          | f=0.0000 |             | 187->194 | 4.96  |             | 178->194 | 7.67   |
|             | 180->194 | 39.20    |             | 193->196 | 23.79 |             | 180->194 | 21.76  |
|             | 182->194 | 28.40    | T19: 348.94 |          |       |             | 181->194 | 7.67   |
|             | 183->194 | 3.84     | f=0.0000    | 181->194 | 2.37  |             | 182->194 | 2.85   |
|             | 184->194 | 2.77     |             | 185->194 | 18.03 |             | 183->194 | 57.53  |
|             | 185->194 | 3.78     |             | 189->195 | 2.58  | T29: 328.54 | 188->194 | 2.52   |
|             | 188->195 | 2.17     |             | 193->196 | 77.03 | f=0.0000    |          |        |
|             | 190->194 | 19.84    | T20: 346.11 |          |       |             | 178->194 | 41.17  |
| T12: 373.02 |          | f=0.0000 | f=0.0000    |          |       |             | 180->194 | 7.86   |
|             | 180->194 | 7.01     |             | 184->195 | 4.68  |             | 181->194 | 40.44  |
|             | 182->194 | 7.32     |             | 186->195 | 48.34 |             | 182->194 | 5.59   |
|             | 184->194 | 2.43     |             | 187->195 | 14.24 |             | 183->194 | 4.93   |
|             | 188->194 | 9.41     |             | 189->195 | 27.86 | T30: 324.27 |          |        |
|             | 190->194 | 73.82    |             | 193->196 | 4.88  | f=0.0000    |          |        |
| T13: 368.40 |          | f=0.0000 | T21: 344.30 |          |       |             | 178->195 | 52.65  |
|             | 183->195 | 2.59     | f=0.0000    | 184->194 | 3.14  |             | 181->195 | 37.59  |
|             | 184->195 | 13.17    |             | 186->194 | 13.06 |             | 183->195 | 6.51   |
|             | 186->195 | 2.22     |             | 187->194 | 83.80 | <b>3N</b>   | 191->196 | 3.25   |
|             | 188->195 | 48.13    | T22: 341.67 |          |       | S1: 557.20  | 181->182 | 100.00 |
|             | 189->195 | 23.59    | f=0.0000    | 178->195 | 3.22  | S2: 539.43  | 180->182 | 100.00 |
|             | 190->195 | 10.29    |             | 185->195 | 4.87  | f=0.0005    |          |        |
| T14: 362.08 |          | f=0.0000 |             | 191->196 | 37.12 | S3: 516.16  | 181->183 | 100.00 |
|             | 178->194 | 3.21     |             | 192->196 | 50.91 | f=0.0006    |          |        |
|             | 181->194 | 9.99     | T23: 339.54 | 193->196 | 3.89  | S4: 499.78  | 179->182 | 55.85  |
|             | 182->194 | 2.94     | f=0.0000    |          |       | f=0.0252    | 180->183 | 44.15  |
|             | 184->194 | 10.77    |             | 178->195 | 2.91  | S5: 495.06  |          |        |
|             |          |          |             |          |       | f=0.0373    |          |        |

|             |          |        |             |          |       |             |          |        |
|-------------|----------|--------|-------------|----------|-------|-------------|----------|--------|
|             | 179->182 | 41.01  |             | 171->182 | 2.30  |             | 169->182 | 63.06  |
|             | 180->183 | 58.99  |             | 172->182 | 59.18 | S27: 287.25 |          |        |
| S6: 479.43  | f=0.0074 |        |             | 173->182 | 16.07 | f=0.0003    |          |        |
|             | 179->183 | 100.00 |             | 175->182 | 6.41  |             | 181->185 | 100.00 |
| S7: 419.10  | f=0.0010 |        |             | 175->183 | 3.11  | S28: 283.63 |          |        |
|             | 176->182 | 11.28  |             | 177->182 | 2.44  | f=0.0003    |          |        |
|             | 177->182 | 7.16   |             | 179->184 | 2.27  |             | 170->182 | 81.08  |
|             | 178->182 | 79.37  |             | 180->184 | 8.22  |             | 171->182 | 13.91  |
|             | 180->182 | 2.19   | S18: 330.99 |          |       |             | 178->184 | 5.01   |
| S8: 386.83  | f=0.0013 |        | f=0.0003    |          |       | S29: 282.91 |          |        |
|             | 175->182 | 6.21   |             | 172->182 | 3.74  | f=0.0009    |          |        |
|             | 176->183 | 7.99   |             | 173->183 | 4.32  |             | 169->183 | 3.87   |
|             | 177->182 | 11.13  |             | 174->182 | 5.39  |             | 170->182 | 5.20   |
|             | 177->183 | 6.99   |             | 175->183 | 65.42 |             | 176->184 | 9.56   |
|             | 178->183 | 67.68  |             | 176->183 | 11.33 |             | 177->184 | 6.55   |
| S9: 383.07  | f=0.0085 |        |             | 177->183 | 9.80  |             | 178->184 | 74.84  |
|             | 175->182 | 22.99  | S19: 327.27 |          |       | S30: 282.53 |          |        |
|             | 176->182 | 5.74   | f=0.0078    |          |       | f=0.0001    |          |        |
|             | 177->182 | 53.18  |             | 171->182 | 2.95  |             | 166->183 | 3.32   |
|             | 178->183 | 18.09  |             | 173->182 | 6.53  |             | 167->183 | 4.12   |
| S10: 359.77 | f=0.0012 |        |             | 174->182 | 36.61 |             | 168->183 | 24.93  |
|             | 175->183 | 19.25  |             | 175->183 | 3.45  |             | 169->183 | 61.83  |
|             | 176->183 | 6.53   | S20: 325.93 | 179->184 | 50.45 |             | 178->184 | 3.59   |
|             | 177->183 | 71.72  | f=0.0117    |          |       | S31: 281.49 | 179->185 | 2.22   |
|             | 178->183 | 2.49   |             | 174->182 | 55.73 | f=0.0002    |          |        |
| S11: 352.17 | f=0.0002 |        |             | 179->184 | 44.27 |             | 180->185 | 100.00 |
|             | 172->182 | 3.66   | S21: 314.84 |          |       | S32: 277.23 |          |        |
|             | 173->182 | 2.21   | f=0.0028    |          |       | f=0.0003    |          |        |
|             | 175->182 | 12.26  |             | 170->182 | 5.34  |             | 167->182 | 3.29   |
|             | 176->182 | 46.57  |             | 171->182 | 36.90 |             | 179->185 | 96.71  |
|             | 177->182 | 19.08  |             | 172->183 | 34.48 | S33: 274.80 |          |        |
|             | 178->182 | 16.22  |             | 173->182 | 2.33  | f=0.0000    |          |        |
| S12: 348.24 | f=0.0022 |        |             | 174->182 | 3.26  |             | 170->183 | 87.38  |
|             | 171->182 | 2.29   | S22: 314.39 | 174->183 | 17.69 |             | 171->183 | 12.62  |
|             | 173->182 | 23.93  | f=0.0024    |          |       | S34: 272.56 |          |        |
|             | 175->182 | 38.37  |             | 171->182 | 8.62  | f=0.0098    | 166->182 | 29.84  |
|             | 176->182 | 28.44  |             | 172->183 | 6.97  |             | 166->183 | 4.50   |
|             | 177->182 | 6.96   | S23: 311.96 | 174->183 | 84.41 |             | 167->182 | 56.09  |
| S13: 344.55 | f=0.0008 |        | f=0.0035    |          |       |             | 168->182 | 5.06   |
|             | 181->184 | 100.00 |             | 170->183 | 4.60  | S35: 269.25 | 169->182 | 4.50   |
|             |          |        |             | 171->183 | 6.16  | f=0.0050    |          |        |
| S14: 337.85 | f=0.0003 |        |             | 173->183 | 84.10 |             | 168->182 | 59.87  |
|             | 175->183 | 5.43   | S24: 303.77 | 175->183 | 5.14  |             | 169->182 | 29.94  |
|             | 176->183 | 60.04  | f=0.0190    |          |       |             | 170->182 | 2.33   |
|             | 177->183 | 10.05  |             | 166->183 | 4.63  |             | 175->184 | 2.16   |
|             | 178->183 | 13.19  |             | 167->183 | 5.22  | S36: 267.97 | 177->184 | 5.70   |
|             | 180->184 | 11.30  |             | 170->182 | 2.78  | f=0.0207    |          |        |
| S15: 337.05 | f=0.0009 |        |             | 171->182 | 23.98 |             | 167->183 | 7.08   |
|             | 172->182 | 7.48   |             | 172->183 | 59.31 |             | 168->182 | 7.81   |
|             | 176->183 | 9.37   | S25: 295.68 | 173->182 | 4.08  |             | 169->182 | 3.06   |
|             | 180->184 | 83.15  | f=0.0224    |          |       |             | 175->184 | 12.95  |
| S16: 333.65 | f=0.0014 |        |             | 166->182 | 11.56 |             | 176->184 | 4.34   |
|             | 170->182 | 4.23   |             | 167->182 | 14.43 |             | 177->184 | 40.55  |
|             | 172->182 | 26.61  |             | 170->183 | 7.26  | S37: 266.89 | 181->186 | 24.22  |
|             | 173->182 | 41.68  |             | 171->183 | 62.53 | f=0.0289    |          |        |
|             | 175->182 | 14.30  | S26: 293.34 | 173->183 | 4.21  |             | 167->183 | 7.40   |
|             | 176->182 | 6.12   | f=0.0069    |          |       |             | 175->184 | 3.17   |
|             | 179->184 | 7.07   |             | 166->182 | 4.92  |             | 177->184 | 11.93  |
| S17: 331.75 | f=0.0007 |        |             | 167->182 | 3.90  |             | 181->186 | 72.33  |
|             |          |        |             | 168->182 | 28.12 | S38: 265.93 | 181->187 | 5.17   |

|             |          |       |          |        |                     |                     |       |
|-------------|----------|-------|----------|--------|---------------------|---------------------|-------|
| f=0.0385    |          |       | 175->184 | 66.48  |                     | 165->183            | 7.11  |
|             | 167->183 | 62.52 | 176->184 | 15.95  |                     | 175->185            | 3.63  |
|             | 169->183 | 4.15  | 177->184 | 10.77  |                     | 177->185            | 11.44 |
|             | 171->182 | 3.18  |          |        | S47: 249.20         | 180->188            | 3.34  |
|             | 171->184 | 6.26  |          |        | f=0.0096            | 181->189            | 20.42 |
|             | 173->184 | 3.60  | 180->187 | 100.00 |                     |                     |       |
|             | 175->184 | 4.52  |          |        | S58: 229.30         |                     |       |
|             | 177->184 | 15.78 |          |        | f=0.0005            |                     |       |
| S39: 263.55 |          |       | 178->185 | 8.29   |                     | 160->182            | 8.57  |
| f=0.0347    |          |       | 179->186 | 5.87   |                     | 162->182            | 4.18  |
|             | 166->182 | 10.50 | 179->187 | 85.85  |                     | 177->185            | 7.07  |
|             | 166->183 | 63.48 |          |        |                     | 179->188            | 2.83  |
|             | 167->183 | 6.48  |          |        | S49: 243.47         | 180->188            | 2.97  |
|             | 168->183 | 12.75 | 176->185 | 9.64   |                     | 181->188            | 3.11  |
|             | 171->184 | 4.34  | 177->185 | 7.73   |                     | 181->189            | 71.26 |
|             | 173->184 | 2.45  | 178->185 | 73.83  | S59: 227.48         |                     |       |
| S40: 261.69 |          |       | 179->187 | 8.80   | f=0.0019            |                     |       |
| f=0.0951    |          |       |          |        |                     | 165->182            | 3.05  |
|             | 166->182 | 12.59 |          |        | S50: 240.81         | 177->186            | 9.43  |
|             | 167->182 | 4.27  | 173->184 | 9.88   | f=0.0026            | 178->186            | 41.24 |
|             | 168->183 | 52.53 | 174->184 | 90.12  |                     | 179->188            | 21.07 |
|             | 169->183 | 25.21 |          |        | S51: 240.52         | 179->189            | 4.21  |
|             | 179->186 | 5.40  |          |        | f=0.0042            | 180->188            | 3.76  |
| S41: 261.20 |          |       | 170->184 | 7.36   |                     | 180->189            | 17.25 |
| f=0.1654    |          |       | 171->184 | 8.57   | S60: 224.99         |                     |       |
|             | 166->182 | 15.40 | 172->184 | 5.02   | f=0.0400            |                     |       |
|             | 166->183 | 12.60 | 173->184 | 65.22  |                     | 171->184            | 3.35  |
|             | 167->182 | 10.29 | 174->184 | 7.45   |                     | 177->186            | 4.91  |
|             | 168->183 | 20.75 | 175->184 | 6.37   |                     | 178->186            | 27.34 |
|             | 169->183 | 10.24 |          |        | S52: 238.21         | 179->188            | 29.83 |
|             | 170->183 | 2.59  |          |        | f=0.0639            | 180->189            | 34.56 |
|             | 171->183 | 6.92  | 171->184 | 3.49   |                     | 180->182            | 7.03  |
|             | 172->184 | 3.76  | 172->184 | 94.11  |                     | 181->182            | 92.97 |
|             | 179->186 | 11.38 | 173->184 | 2.40   | T1: 565.52 f=0.0000 |                     |       |
|             | 180->186 | 6.06  |          |        | T2: 551.36 f=0.0000 | 178->182            | 2.24  |
| S42: 259.44 |          |       | 181->188 | 91.76  |                     | 179->182            | 10.79 |
| f=0.0629    |          |       | 181->189 | 4.92   |                     | 180->182            | 78.90 |
|             | 166->182 | 3.90  | 181->192 | 3.32   | T3: 538.46 f=0.0000 | 181->182            | 8.07  |
|             | 179->186 | 5.46  |          |        |                     | 179->182            | 89.60 |
|             | 180->186 | 78.34 |          |        | S54: 232.84         | 180->182            | 10.40 |
|             | 181->186 | 2.84  |          |        | f=0.0008            |                     |       |
|             | 181->187 | 9.47  | 160->182 | 14.32  |                     | T4: 518.85 f=0.0000 |       |
| S43: 258.21 |          |       | 162->182 | 5.29   |                     | 179->183            | 3.96  |
| f=0.0301    |          |       | 165->182 | 4.18   |                     | 181->183            | 96.04 |
|             | 179->186 | 76.98 | 175->185 | 19.91  | T5: 502.75 f=0.0000 |                     |       |
|             | 179->187 | 2.82  | 176->185 | 6.18   |                     | 171->183            | 3.35  |
|             | 180->186 | 10.61 | 177->185 | 50.12  |                     | 179->183            | 39.64 |
|             | 181->186 | 3.61  |          |        | S55: 232.74         | 180->182            | 2.79  |
|             | 181->187 | 5.98  |          |        | f=0.0024            | 180->183            | 49.04 |
| S44: 254.75 |          |       | 158->182 | 4.32   |                     | 181->183            | 5.17  |
| f=0.0312    |          |       | 160->183 | 3.64   | T6: 497.30 f=0.0000 |                     |       |
|             | 176->184 | 3.74  | 163->182 | 5.16   |                     | 171->183            | 3.24  |
|             | 177->184 | 3.06  | 164->182 | 13.13  |                     | 179->183            | 48.58 |
|             | 180->186 | 12.72 | 165->182 | 68.05  |                     | 180->183            | 48.18 |
|             | 181->186 | 5.13  | 178->185 | 2.60   | T7: 431.20 f=0.0000 |                     |       |
|             | 181->187 | 75.35 | 178->186 | 3.10   |                     | 171->183            | 11.68 |
| S45: 254.02 |          |       |          |        | S56: 231.00         | 173->183            | 4.06  |
| f=0.0114    |          |       |          |        | f=0.0224            | 176->182            | 8.77  |
|             | 175->184 | 5.84  | 180->188 | 86.74  |                     | 177->182            | 6.28  |
|             | 176->184 | 63.86 | 180->189 | 5.14   |                     | 178->182            | 61.40 |
|             | 177->184 | 9.43  | 180->192 | 4.18   |                     | 179->183            | 4.54  |
|             | 178->184 | 15.60 | 181->189 | 3.94   |                     | 180->182            | 3.27  |
|             | 181->187 | 5.27  |          |        | S57: 229.88         |                     |       |
| S46: 250.57 |          |       |          |        | f=0.0043            | T8: 427.53 f=0.0000 |       |
| f=0.0003    |          |       | 160->182 | 41.48  |                     | 162->182            | 3.09  |
|             | 173->184 | 6.80  | 162->182 | 12.58  |                     | 166->182            | 5.70  |
|             |          |       |          |        |                     | 167->182            | 4.07  |

|             |          |          |             |          |       |             |          |        |
|-------------|----------|----------|-------------|----------|-------|-------------|----------|--------|
|             | 170->183 | 3.54     |             | 175->182 | 43.86 |             | 172->183 | 34.96  |
|             | 171->183 | 36.33    |             | 176->182 | 31.04 |             | 179->184 | 6.98   |
|             | 172->182 | 3.26     |             | 177->182 | 8.87  | T25: 314.13 |          |        |
|             | 173->183 | 16.12    | T16: 346.01 |          |       | f=0.0000    |          |        |
|             | 174->183 | 2.88     | f=0.0000    |          |       |             | 173->183 | 9.92   |
|             | 176->182 | 3.38     |             | 179->184 | 2.16  |             | 174->183 | 90.08  |
|             | 178->182 | 16.30    |             | 181->184 | 97.84 | T26: 311.65 |          |        |
|             | 179->183 | 5.32     | T17: 338.72 |          |       | f=0.0000    |          |        |
| T9: 393.80  |          | f=0.0000 | f=0.0000    |          |       |             | 170->183 | 9.41   |
|             | 175->182 | 10.68    |             | 179->184 | 26.52 |             | 171->183 | 17.71  |
|             | 176->182 | 3.60     |             | 180->184 | 69.46 |             | 172->183 | 6.30   |
|             | 176->183 | 7.52     |             | 181->184 | 4.01  |             | 173->183 | 57.79  |
|             | 177->182 | 18.46    | T18: 337.96 |          |       |             | 174->183 | 5.39   |
|             | 177->183 | 5.56     | f=0.0000    |          |       |             | 175->183 | 3.41   |
|             | 178->183 | 54.18    |             | 175->183 | 4.87  | T27: 310.09 |          |        |
| T10: 387.97 |          | f=0.0000 |             | 176->183 | 65.68 | f=0.0000    |          |        |
|             |          |          |             | 177->183 | 10.27 |             | 162->183 | 3.71   |
|             | 171->182 | 8.41     |             | 178->183 | 16.29 |             | 166->183 | 11.00  |
|             | 173->182 | 2.46     |             | 179->184 | 2.89  |             | 167->183 | 12.89  |
|             | 174->182 | 3.62     | T19: 336.01 |          |       |             | 171->183 | 4.49   |
|             | 175->182 | 15.62    | f=0.0000    |          |       |             | 171->184 | 6.48   |
|             | 176->182 | 4.48     |             | 166->183 | 3.03  |             | 172->183 | 48.04  |
|             | 176->183 | 3.30     |             | 167->183 | 2.52  |             | 173->183 | 4.17   |
|             | 177->182 | 33.69    |             | 176->183 | 4.25  |             | 173->184 | 2.87   |
|             | 178->183 | 28.43    |             | 179->184 | 58.86 |             | 179->184 | 6.34   |
| T11: 371.86 |          | f=0.0000 |             | 180->184 | 31.35 | T28: 299.28 |          |        |
|             |          |          | T20: 331.27 |          |       | f=0.0000    |          |        |
|             | 162->183 | 2.31     | f=0.0000    |          |       |             | 166->182 | 5.93   |
|             | 170->182 | 4.35     |             | 170->182 | 2.31  |             | 167->182 | 5.42   |
|             | 171->182 | 43.59    |             | 171->182 | 4.10  |             | 168->182 | 26.10  |
|             | 173->182 | 33.53    |             | 172->182 | 2.70  |             | 169->182 | 62.54  |
|             | 174->182 | 3.59     |             | 173->182 | 20.77 | T29: 289.51 |          |        |
|             | 175->182 | 4.18     |             | 174->182 | 6.84  | f=0.0000    |          |        |
|             | 177->182 | 8.46     |             | 175->182 | 3.14  |             | 159->182 | 26.43  |
| T12: 360.58 |          | f=0.0000 |             | 175->183 | 46.58 |             | 160->183 | 2.89   |
|             |          |          |             | 176->183 | 6.57  |             | 161->182 | 2.88   |
|             | 175->183 | 19.90    |             | 177->183 | 6.97  |             | 162->183 | 12.57  |
|             | 176->183 | 7.01     | T21: 330.67 |          |       |             | 166->183 | 3.71   |
|             | 177->183 | 70.62    | f=0.0000    |          |       |             | 166->185 | 4.80   |
|             | 178->183 | 2.47     |             | 170->182 | 6.61  |             | 167->183 | 5.57   |
| T13: 356.20 |          | f=0.0000 |             | 171->182 | 14.12 |             | 167->185 | 3.91   |
|             |          |          |             | 173->182 | 32.20 |             | 171->184 | 16.94  |
|             | 166->182 | 10.50    |             | 175->182 | 10.36 |             | 172->183 | 10.58  |
|             | 167->182 | 10.65    |             | 175->183 | 25.90 |             | 173->184 | 7.26   |
|             | 171->183 | 8.54     |             | 176->183 | 6.78  |             | 180->185 | 2.47   |
|             | 172->182 | 29.70    |             | 177->183 | 4.03  | T30: 287.84 |          |        |
|             | 173->183 | 2.87     | T22: 326.89 |          |       | f=0.0000    |          |        |
|             | 175->182 | 3.95     | f=0.0000    |          |       |             | 181->185 | 100.00 |
|             | 176->182 | 19.24    |             | 166->182 | 20.03 | <b>4N</b>   |          |        |
|             | 177->182 | 7.72     |             | 167->182 | 18.68 | S1: 569.93  | f=0.0034 |        |
|             | 178->182 | 6.83     |             | 172->182 | 46.24 |             | 160->161 | 100.00 |
| T14: 349.91 |          | f=0.0000 |             | 174->182 | 15.05 | S2: 544.49  | f=0.0001 |        |
|             |          |          | T23: 325.17 |          |       |             | 157->161 | 2.17   |
|             | 166->182 | 12.90    | f=0.0000    |          |       |             | 159->161 | 97.83  |
|             | 167->182 | 10.24    |             | 167->182 | 2.91  | S3: 528.83  | f=0.0005 |        |
|             | 171->183 | 4.60     |             | 170->182 | 2.23  |             | 160->162 | 100.00 |
|             | 172->182 | 8.94     |             | 171->182 | 8.22  | S4: 501.97  | f=0.0007 |        |
|             | 173->183 | 2.61     |             | 172->182 | 5.82  |             | 159->162 | 100.00 |
|             | 175->182 | 8.79     |             | 174->182 | 72.88 | S5: 485.72  | f=0.0543 |        |
|             | 176->182 | 27.08    |             | 175->183 | 2.90  |             | 158->161 | 100.00 |
|             | 177->182 | 13.17    |             | 176->183 | 2.19  | S6: 467.35  | f=0.0075 |        |
|             | 178->182 | 11.67    |             | 177->182 | 2.84  |             | 158->162 | 100.00 |
| T15: 347.11 |          | f=0.0000 | T24: 323.53 |          |       | S7: 419.35  | f=0.0003 |        |
|             |          |          | f=0.0000    |          |       |             | 156->161 | 5.25   |
|             | 171->182 | 7.75     |             | 166->183 | 30.33 |             | 157->161 | 91.85  |
|             | 173->182 | 8.48     |             | 167->183 | 27.72 |             | 159->161 | 2.90   |



|                         |                                                   |                         |                                                                                                       |          |                         |                                                                                                      |
|-------------------------|---------------------------------------------------|-------------------------|-------------------------------------------------------------------------------------------------------|----------|-------------------------|------------------------------------------------------------------------------------------------------|
| S8: 390.48<br>f=0.0139  | 156->161 75.61<br>157->161 3.69<br>157->162 20.69 |                         | 158->164 6.49<br>158->165 54.39<br>160->167 39.12                                                     | f=0.0006 |                         | 160->170 100.00                                                                                      |
| S9: 387.22<br>f=0.0019  | 156->161 19.28<br>156->162 3.15<br>157->162 77.57 | S24: 318.83<br>f=0.0003 | 155->162 100.00                                                                                       |          | S37: 290.02<br>f=0.0086 | 150->161 9.52<br>151->161 3.24<br>152->161 2.30<br>157->163 68.38<br>159->168 13.75<br>160->170 2.81 |
| S10: 371.68<br>f=0.0106 | 160->163 100.00                                   | S25: 317.54<br>f=0.0006 | 159->166 85.76<br>159->167 14.24                                                                      |          | S38: 286.94<br>f=0.0012 | 159->168 4.63<br>159->169 95.37                                                                      |
| S11: 365.37<br>f=0.0019 | 156->162 96.17<br>157->162 3.83                   |                         | 148->162 3.74<br>153->161 44.48<br>154->162 51.77                                                     |          | S39: 285.85<br>f=0.0003 | 147->161 3.01<br>151->161 7.75<br>152->161 69.80<br>156->163 19.44                                   |
| S12: 355.30<br>f=0.0084 | 159->163 8.51<br>160->164 89.39<br>160->165 2.11  | S27: 310.40<br>f=0.0002 | 159->166 14.51<br>159->167 85.49                                                                      |          |                         |                                                                                                      |
| S13: 353.80<br>f=0.0025 | 159->163 91.87<br>160->164 8.13                   | S28: 306.24<br>f=0.0087 | 148->162 4.74<br>153->161 20.36<br>154->162 28.69<br>158->166 36.75<br>158->167 4.78<br>160->168 4.68 |          | S40: 284.50<br>f=0.0118 | 152->161 9.16<br>156->163 68.22<br>157->165 11.84<br>158->168 4.15<br>159->170 6.62                  |
| S14: 351.20<br>f=0.0031 | 155->161 3.35<br>160->164 2.81<br>160->165 93.85  | S29: 304.88<br>f=0.0161 | 148->162 3.17<br>153->161 15.28<br>154->162 21.31<br>158->166 60.23                                   |          | S41: 283.73<br>f=0.0020 | 152->161 4.64<br>156->163 5.18<br>156->165 4.65<br>157->165 85.54                                    |
| S15: 343.44<br>f=0.0002 | 155->161 96.37<br>160->165 3.63                   |                         | 158->166 3.23<br>160->168 94.60<br>160->169 2.17                                                      |          | S42: 283.13<br>f=0.0010 | 156->163 4.22<br>157->164 3.08<br>159->170 92.70                                                     |
| S16: 340.63<br>f=0.0095 | 154->161 2.16<br>158->163 94.18<br>159->165 3.66  | S30: 302.92<br>f=0.0008 | 158->166 4.26<br>158->167 51.81<br>160->169 43.93                                                     |          | S43: 282.62<br>f=0.0004 | 149->162 2.94<br>150->162 87.61<br>151->162 6.72<br>152->162 2.72                                    |
| S17: 339.84<br>f=0.0007 | 154->161 7.78<br>158->163 5.49<br>159->165 86.73  | S31: 298.64<br>f=0.0067 | 157->163 5.66<br>158->167 38.82<br>160->168 2.78<br>160->169 52.74                                    |          | S44: 281.30<br>f=0.0025 | 157->164 16.35<br>158->168 83.65                                                                     |
| S18: 339.44<br>f=0.0011 | 159->164 100.00                                   | S32: 297.49<br>f=0.0237 | 148->161 21.79<br>149->161 3.52<br>153->162 74.69                                                     |          | S45: 280.23<br>f=0.0071 | 156->163 3.02<br>157->164 83.70<br>158->168 13.28                                                    |
| S19: 334.66<br>f=0.0002 | 154->161 90.77<br>159->165 9.23                   | S33: 296.51<br>f=0.0269 | 149->161 2.33<br>150->161 76.11<br>151->161 7.85<br>157->163 13.70                                    |          | S46: 276.57<br>f=0.0056 | 147->162 2.56<br>151->162 9.38<br>152->162 88.05                                                     |
| S20: 331.16<br>f=0.0085 | 160->166 89.81<br>160->167 10.19                  | S34: 293.75<br>f=0.0228 | 157->163 10.77<br>159->168 85.23<br>159->169 4.00                                                     |          | S47: 275.77<br>f=0.0032 | 158->169 100.00                                                                                      |
| S21: 325.58<br>f=0.0092 | 158->164 93.88<br>158->165 2.55<br>160->167 3.58  | S35: 291.52<br>f=0.0025 |                                                                                                       |          | S48: 275.39<br>f=0.0024 | 147->161 3.58<br>149->161 2.87<br>150->161 6.61                                                      |
| S22: 323.78<br>f=0.0123 | 158->165 40.92<br>160->166 9.88<br>160->167 49.20 |                         |                                                                                                       |          |                         |                                                                                                      |
| S23: 321.66<br>f=0.0176 |                                                   | S36: 291.17             |                                                                                                       |          |                         |                                                                                                      |

|             |          |       |                     |          |        |                     |          |       |
|-------------|----------|-------|---------------------|----------|--------|---------------------|----------|-------|
|             | 151->161 | 65.44 |                     | 157->166 | 86.85  |                     | 156->162 | 5.02  |
|             | 152->161 | 13.94 |                     | 157->167 | 10.90  |                     | 157->161 | 12.62 |
|             | 156->164 | 2.73  | S57: 263.92         |          |        |                     | 158->162 | 9.33  |
|             | 156->165 | 2.47  | f=0.0506            |          |        | T9: 399.75 f=0.0000 |          |       |
|             | 158->169 | 2.37  |                     | 146->161 | 54.10  |                     | 153->161 | 4.19  |
| S49: 273.41 |          |       |                     | 148->161 | 8.13   |                     | 156->161 | 79.69 |
| f=0.0003    |          |       |                     | 148->162 | 29.32  |                     | 157->161 | 3.09  |
|             | 148->161 | 2.34  |                     | 149->162 | 4.40   |                     | 157->162 | 13.03 |
|             | 149->161 | 3.25  |                     | 153->165 | 4.05   | T10: 391.86         |          |       |
|             | 156->164 | 8.08  | S58: 261.91         |          |        | f=0.0000            |          |       |
|             | 158->170 | 86.33 | f=0.0176            |          |        |                     | 153->161 | 3.76  |
| S50: 273.29 |          |       |                     | 146->161 | 24.64  |                     | 156->161 | 10.73 |
| f=0.0099    |          |       |                     | 147->161 | 7.52   |                     | 156->162 | 4.57  |
|             | 151->161 | 2.82  |                     | 147->162 | 14.07  |                     | 157->162 | 80.95 |
|             | 156->164 | 81.46 |                     | 148->162 | 24.53  | T11: 382.61         |          |       |
|             | 156->165 | 5.41  |                     | 149->161 | 4.34   | f=0.0000            |          |       |
|             | 158->170 | 10.30 |                     | 149->162 | 22.32  |                     | 147->163 | 2.44  |
| S51: 271.86 |          |       |                     | 153->165 | 2.57   |                     | 156->163 | 3.84  |
| f=0.0131    |          |       | S59: 260.67         |          |        |                     | 158->163 | 10.09 |
|             | 147->161 | 3.35  | f=0.1506            |          |        |                     | 160->163 | 83.64 |
|             | 148->161 | 2.34  |                     | 145->161 | 2.59   | T12: 368.21         |          |       |
|             | 148->162 | 2.36  |                     | 146->161 | 14.79  | f=0.0000            |          |       |
|             | 149->161 | 19.34 |                     | 147->162 | 8.45   |                     | 145->164 | 2.35  |
|             | 150->161 | 2.43  |                     | 148->161 | 25.01  |                     | 152->164 | 2.41  |
|             | 151->161 | 6.55  |                     | 153->162 | 6.84   |                     | 153->161 | 28.14 |
|             | 156->164 | 4.90  |                     | 154->165 | 3.30   |                     | 156->164 | 3.39  |
|             | 156->165 | 55.74 |                     | 157->166 | 8.87   |                     | 158->164 | 6.36  |
|             | 157->165 | 2.99  |                     | 157->167 | 30.15  |                     | 160->164 | 57.35 |
| S52: 270.98 |          |       | S60: 260.51         |          |        | T13: 368.02         |          |       |
| f=0.0110    |          |       | f=0.0782            |          |        | f=0.0000            |          |       |
|             | 147->161 | 8.08  |                     | 146->161 | 5.81   |                     | 153->161 | 73.48 |
|             | 148->161 | 5.77  |                     | 147->162 | 4.12   |                     | 156->161 | 4.68  |
|             | 149->161 | 49.81 |                     | 148->161 | 11.80  |                     | 160->164 | 21.84 |
|             | 150->161 | 2.72  |                     | 153->162 | 3.31   | T14: 365.87         |          |       |
|             | 156->164 | 2.88  |                     | 156->166 | 3.27   | f=0.0000            |          |       |
|             | 156->165 | 30.74 |                     | 157->166 | 5.65   |                     | 148->161 | 4.53  |
|             |          |       |                     | 157->167 | 66.04  |                     | 156->162 | 90.83 |
| S53: 267.56 |          |       | T1: 579.74 f=0.0000 |          |        |                     | 157->162 | 4.64  |
| f=0.0005    |          |       |                     | 160->161 | 100.00 | T15: 354.53         |          |       |
|             | 147->162 | 3.60  | T2: 554.05 f=0.0000 |          |        | f=0.0000            |          |       |
|             | 149->162 | 3.88  |                     | 157->161 | 3.83   |                     | 159->163 | 93.16 |
|             | 150->162 | 5.64  |                     | 159->161 | 93.61  |                     | 160->165 | 6.84  |
|             | 151->162 | 76.33 |                     | 160->161 | 2.55   | T16: 353.83         |          |       |
|             | 152->162 | 10.55 |                     |          |        | f=0.0000            |          |       |
| S54: 266.24 |          |       | T3: 530.96 f=0.0000 |          |        |                     |          |       |
| f=0.0043    |          |       |                     | 160->162 | 100.00 |                     | 147->163 | 2.36  |
|             | 145->161 | 2.19  | T4: 520.01 f=0.0000 |          |        |                     | 148->161 | 3.74  |
|             | 146->161 | 2.78  |                     | 158->161 | 93.68  |                     | 153->162 | 2.56  |
|             | 147->161 | 68.33 |                     | 159->162 | 6.32   |                     | 154->161 | 4.04  |
|             | 148->161 | 2.55  | T5: 505.06 f=0.0000 |          |        |                     | 158->163 | 12.03 |
|             | 149->161 | 13.14 |                     | 158->161 | 6.94   |                     | 159->163 | 10.68 |
|             | 149->162 | 5.91  |                     | 159->162 | 93.06  |                     | 160->163 | 2.39  |
|             | 151->161 | 2.27  | T6: 489.10 f=0.0000 |          |        |                     | 160->165 | 62.19 |
|             | 151->162 | 2.83  |                     | 153->162 | 14.70  | T17: 352.81         |          |       |
| S55: 265.48 |          |       |                     | 158->162 | 85.30  | f=0.0000            |          |       |
| f=0.0566    |          |       | T7: 428.62 f=0.0000 |          |        |                     | 141->170 | 2.13  |
|             | 146->161 | 5.64  |                     | 153->162 | 10.13  |                     | 148->161 | 32.57 |
|             | 147->161 | 4.09  |                     | 156->161 | 3.40   |                     | 149->161 | 4.89  |
|             | 148->161 | 2.50  |                     | 157->161 | 78.25  |                     | 153->162 | 19.39 |
|             | 148->162 | 17.95 |                     | 158->162 | 4.25   |                     | 154->161 | 30.27 |
|             | 149->162 | 48.16 |                     | 159->161 | 3.97   |                     | 156->162 | 2.13  |
|             | 150->162 | 3.94  | T8: 426.35 f=0.0000 |          |        |                     | 160->165 | 8.62  |
|             | 153->161 | 6.37  |                     | 148->161 | 9.35   | T18: 350.14         |          |       |
|             | 153->165 | 11.34 |                     | 148->165 | 2.45   | f=0.0000            |          |       |
| S56: 265.08 |          |       |                     | 150->162 | 2.86   |                     | 145->163 | 2.27  |
| f=0.0051    |          |       |                     | 153->162 | 55.09  |                     | 146->166 | 3.13  |
|             | 157->165 | 2.26  |                     | 154->161 | 3.28   |                     | 147->163 | 4.41  |

|                         |          |        |                     |          |       |                     |          |       |
|-------------------------|----------|--------|---------------------|----------|-------|---------------------|----------|-------|
|                         | 158->163 | 42.03  |                     | 145->163 | 5.99  | S6: 549.58 f=0.0470 |          |       |
|                         | 160->163 | 14.08  |                     | 146->166 | 5.50  |                     | 183->186 | 24.55 |
|                         | 160->165 | 28.52  |                     | 146->167 | 4.58  |                     | 183->187 | 75.45 |
|                         | 160->167 | 5.56   |                     | 147->163 | 3.18  | S7: 451.28 f=0.0011 |          |       |
| T19: 341.86<br>f=0.0000 |          |        |                     | 151->169 | 2.64  |                     | 176->186 | 4.16  |
|                         |          |        |                     | 156->163 | 3.67  |                     | 178->186 | 19.44 |
|                         | 145->164 | 5.66   |                     | 158->163 | 21.78 |                     | 178->187 | 3.09  |
|                         | 149->166 | 2.79   |                     | 158->164 | 16.02 |                     | 179->186 | 14.37 |
|                         | 149->168 | 5.02   |                     | 160->166 | 23.22 |                     | 179->187 | 2.34  |
|                         | 152->164 | 4.75   |                     | 160->167 | 13.40 |                     | 181->186 | 17.92 |
|                         | 152->167 | 3.46   | T27: 326.19         |          |       |                     | 181->187 | 2.89  |
|                         | 158->163 | 10.86  | f=0.0000            |          |       |                     | 182->186 | 31.24 |
|                         | 158->164 | 10.53  |                     | 148->161 | 34.14 |                     | 182->187 | 4.56  |
|                         | 158->167 | 2.72   |                     | 149->161 | 5.26  | S8: 425.50 f=0.0011 |          |       |
|                         | 159->164 | 3.55   |                     | 154->161 | 58.34 |                     | 176->187 | 2.41  |
|                         | 160->164 | 28.60  |                     | 158->164 | 2.26  |                     | 178->186 | 2.21  |
|                         | 160->166 | 10.63  | T28: 324.33         |          |       |                     | 178->187 | 17.30 |
|                         | 160->167 | 11.43  | f=0.0000            |          |       |                     | 179->187 | 13.35 |
| T20: 341.41<br>f=0.0000 |          |        |                     | 141->161 | 2.56  |                     | 181->186 | 3.15  |
|                         |          |        |                     | 148->162 | 35.31 |                     | 181->187 | 15.43 |
|                         | 155->161 | 100.00 |                     | 149->162 | 5.37  |                     | 182->186 | 6.45  |
| T21: 340.21<br>f=0.0000 |          |        |                     | 154->162 | 43.58 |                     | 182->187 | 39.70 |
|                         |          |        |                     | 155->162 | 2.57  | S9: 410.61 f=0.0069 |          |       |
|                         | 159->164 | 4.49   |                     | 158->165 | 10.61 |                     | 175->186 | 9.61  |
|                         | 159->165 | 93.29  | T29: 322.51         |          |       |                     | 176->186 | 18.76 |
|                         | 159->166 | 2.22   | f=0.0000            |          |       |                     | 180->186 | 9.37  |
| T22: 339.66<br>f=0.0000 |          |        |                     | 145->163 | 4.15  |                     | 181->186 | 36.27 |
|                         |          |        |                     | 146->166 | 7.25  |                     | 181->187 | 2.49  |
|                         | 151->169 | 3.49   |                     | 146->167 | 4.58  |                     | 182->186 | 23.50 |
|                         | 159->164 | 90.38  |                     | 147->163 | 10.55 | S10: 402.27         |          |       |
|                         | 159->165 | 6.13   |                     | 156->163 | 2.73  | f=0.0014            |          |       |
| T23: 338.87<br>f=0.0000 |          |        |                     | 158->163 | 6.43  |                     | 175->186 | 5.25  |
|                         |          |        |                     | 158->164 | 3.47  |                     | 176->186 | 8.02  |
|                         | 145->164 | 2.53   |                     | 158->166 | 3.21  |                     | 176->187 | 2.73  |
|                         | 145->167 | 2.33   |                     | 160->167 | 57.64 |                     | 178->186 | 9.96  |
|                         | 147->163 | 6.11   | T30: 320.94         |          |       |                     | 179->186 | 21.34 |
|                         | 147->164 | 3.31   | f=0.0000            |          |       |                     | 180->186 | 8.38  |
|                         | 151->164 | 3.35   |                     | 145->164 | 4.71  |                     | 181->186 | 4.65  |
|                         | 151->166 | 3.57   |                     | 147->168 | 2.60  |                     | 182->186 | 39.67 |
|                         | 151->169 | 21.64  |                     | 149->166 | 6.07  | S11: 396.70         |          |       |
|                         | 152->163 | 12.58  |                     | 149->168 | 4.55  | f=0.0011            |          |       |
|                         | 152->164 | 7.95   |                     | 149->169 | 2.55  |                     | 175->187 | 2.54  |
|                         | 152->165 | 2.22   |                     | 152->164 | 4.34  |                     | 176->187 | 3.09  |
|                         | 152->167 | 6.83   |                     | 152->167 | 3.79  |                     | 180->187 | 2.52  |
|                         | 152->168 | 4.66   |                     | 156->164 | 2.82  |                     | 181->187 | 50.10 |
|                         | 152->169 | 2.48   |                     | 158->164 | 57.34 |                     | 182->187 | 41.75 |
|                         | 158->163 | 2.23   |                     | 160->167 | 11.24 | S12: 388.89         |          |       |
|                         | 158->164 | 2.44   | <b>1P</b>           |          |       | f=0.0000            |          |       |
|                         | 159->164 | 11.18  | S1: 630.85 f=0.0064 |          |       |                     | 175->187 | 5.97  |
|                         | 160->167 | 4.58   |                     | 183->186 | 3.29  |                     | 176->187 | 11.89 |
| T24: 332.62<br>f=0.0000 |          |        |                     | 185->186 | 87.38 |                     | 178->187 | 12.43 |
|                         |          |        |                     | 185->187 | 9.33  |                     | 179->187 | 24.67 |
|                         | 145->164 | 2.37   | S2: 610.42 f=0.0006 |          |       |                     | 180->186 | 6.26  |
|                         | 158->163 | 2.56   |                     | 184->186 | 77.77 |                     | 180->187 | 21.14 |
|                         | 158->164 | 14.03  |                     | 184->187 | 12.90 |                     | 181->187 | 2.70  |
|                         | 160->164 | 5.26   |                     | 185->187 | 9.34  |                     | 182->187 | 14.95 |
|                         | 160->166 | 72.90  | S3: 607.73 f=0.0014 |          |       | S13: 383.30         |          |       |
|                         | 160->167 | 2.89   |                     | 184->186 | 8.04  | f=0.0003            |          |       |
| T25: 332.06<br>f=0.0000 |          |        |                     | 185->186 | 8.91  |                     | 176->186 | 16.33 |
|                         |          |        |                     | 185->187 | 83.05 |                     | 176->187 | 4.68  |
|                         | 148->162 | 16.33  | S4: 581.15 f=0.0006 |          |       |                     | 178->186 | 18.93 |
|                         | 149->162 | 2.40   |                     | 184->186 | 14.47 |                     | 179->186 | 8.09  |
|                         | 153->165 | 6.46   |                     | 184->187 | 85.53 |                     | 180->186 | 11.95 |
|                         | 158->165 | 74.81  | S5: 555.05 f=0.0257 |          |       |                     | 181->186 | 36.52 |
| T26: 330.29<br>f=0.0000 |          |        |                     | 183->186 | 70.61 |                     | 182->186 | 3.50  |
|                         |          |        |                     | 183->187 | 29.39 | S14: 381.19         |          |       |

|             |          |       |             |          |        |             |          |        |
|-------------|----------|-------|-------------|----------|--------|-------------|----------|--------|
| f=0.0010    |          |       | 176->186    | 14.05    |        | 170->187    | 17.76    |        |
|             | 176->186 | 10.87 |             | 176->187 | 2.43   |             | 171->186 | 54.87  |
|             | 179->186 | 3.70  |             | 183->188 | 3.27   |             | 171->187 | 17.22  |
|             | 180->186 | 45.53 | S25: 352.44 |          |        |             | 172->187 | 10.14  |
|             | 185->188 | 39.89 | f=0.0016    |          |        | S36: 296.28 |          |        |
| S15: 380.76 |          |       | 173->186    | 72.12    |        | f=0.0002    |          |        |
| f=0.0045    |          |       | 173->187    | 11.50    |        |             | 171->187 | 7.27   |
|             | 176->186 | 9.41  |             | 174->186 | 9.68   |             | 183->189 | 92.73  |
|             | 180->186 | 20.42 |             | 175->186 | 4.10   | S37: 287.06 |          |        |
|             | 181->187 | 3.44  |             | 183->188 | 2.60   | f=0.0202    |          |        |
|             | 185->188 | 66.74 | S26: 349.19 |          |        |             | 170->186 | 27.55  |
| S16: 373.73 |          |       | f=0.0057    |          |        |             | 170->187 | 3.92   |
| f=0.0001    |          |       | 173->186    | 16.39    |        |             | 171->186 | 10.14  |
|             | 176->186 | 7.38  |             | 174->186 | 39.44  |             | 171->187 | 47.21  |
|             | 176->187 | 25.39 |             | 174->187 | 6.14   |             | 172->187 | 2.21   |
|             | 178->187 | 17.73 |             | 175->186 | 31.95  |             | 183->189 | 8.97   |
|             | 179->187 | 3.18  |             | 181->186 | 2.60   | S38: 285.85 |          |        |
|             | 180->186 | 3.52  |             | 183->188 | 3.48   | f=0.0019    |          |        |
|             | 180->187 | 16.51 | S27: 346.66 |          |        |             | 175->188 | 3.21   |
|             | 181->187 | 24.00 | f=0.0001    |          |        |             | 176->188 | 5.97   |
|             | 182->187 | 2.29  |             | 175->186 | 5.31   |             | 180->188 | 3.54   |
| S17: 373.04 |          |       |             | 175->187 | 84.59  |             | 181->188 | 47.88  |
| f=0.0001    |          |       |             | 176->187 | 10.09  |             | 182->188 | 39.41  |
|             | 177->186 | 75.90 | S28: 333.49 |          |        | S39: 281.63 |          |        |
|             | 177->187 | 24.10 | f=0.0020    |          |        | f=0.0016    |          |        |
| S18: 370.82 |          |       | 173->186    | 2.69     |        |             | 175->188 | 7.70   |
| f=0.0005    |          |       | 173->187    | 21.98    |        |             | 176->188 | 14.96  |
|             | 176->187 | 8.82  |             | 174->186 | 10.70  |             | 178->188 | 12.34  |
|             | 179->187 | 2.71  |             | 174->187 | 64.63  |             | 179->188 | 26.46  |
|             | 180->187 | 27.49 | S29: 332.31 |          |        |             | 180->188 | 21.38  |
|             | 184->188 | 60.98 | f=0.0066    |          |        |             | 182->188 | 17.15  |
| S19: 370.42 |          |       | 172->186    | 2.30     |        | S40: 274.46 |          |        |
| f=0.0002    |          |       | 173->186    | 8.70     |        | f=0.0026    |          |        |
|             | 176->186 | 2.98  |             | 173->187 | 66.13  |             | 183->190 | 2.78   |
|             | 176->187 | 19.08 |             | 174->187 | 22.86  |             | 185->190 | 97.22  |
|             | 179->187 | 6.53  | S30: 309.38 |          |        | S41: 273.73 |          |        |
|             | 180->187 | 33.55 | f=0.0002    |          |        | f=0.0008    |          |        |
|             | 184->188 | 37.86 |             | 185->189 | 100.00 |             | 176->188 | 19.11  |
| S20: 368.93 |          |       | S31: 308.59 |          |        |             | 178->188 | 18.62  |
| f=0.0001    |          |       | f=0.0114    |          |        |             | 179->188 | 6.30   |
|             | 177->186 | 24.45 |             | 170->187 | 2.23   |             | 180->188 | 24.32  |
|             | 177->187 | 75.55 |             | 172->186 | 82.68  |             | 181->188 | 29.01  |
| S21: 360.96 |          |       |             | 172->187 | 12.71  |             | 182->188 | 2.64   |
| f=0.0000    |          |       |             | 173->187 | 2.38   | S42: 272.02 |          |        |
|             | 176->186 | 4.73  | S32: 303.03 |          |        | f=0.0001    |          |        |
|             | 178->186 | 43.44 | f=0.0011    |          |        |             | 175->188 | 2.74   |
|             | 178->187 | 5.04  |             | 171->186 | 16.33  |             | 176->188 | 38.50  |
|             | 179->186 | 41.78 |             | 172->186 | 12.20  |             | 179->188 | 6.29   |
|             | 179->187 | 5.01  |             | 172->187 | 71.47  |             | 180->188 | 52.46  |
| S22: 360.11 |          |       | S33: 301.88 |          |        | S43: 269.90 |          |        |
| f=0.0069    |          |       | f=0.0003    |          |        | f=0.0002    |          |        |
|             | 174->186 | 7.53  |             | 172->187 | 4.49   |             | 177->188 | 100.00 |
|             | 183->188 | 92.47 |             | 176->188 | 3.16   | S44: 264.59 |          |        |
| S23: 356.87 |          |       |             | 178->188 | 16.90  | f=0.0178    |          |        |
| f=0.0000    |          |       |             | 179->188 | 12.58  |             | 183->190 | 36.82  |
|             | 176->187 | 8.13  |             | 181->188 | 16.12  |             | 184->190 | 63.18  |
|             | 178->186 | 5.29  |             | 182->188 | 34.65  | S45: 263.41 |          |        |
|             | 178->187 | 42.06 |             | 184->189 | 12.11  | f=0.0003    |          |        |
|             | 179->186 | 4.37  | S34: 301.49 |          |        |             | 176->188 | 8.19   |
|             | 179->187 | 40.16 | f=0.0003    |          |        |             | 178->188 | 47.33  |
| S24: 355.29 |          |       |             | 178->188 | 2.61   |             | 179->188 | 44.48  |
| f=0.0010    |          |       |             | 181->188 | 2.78   | S46: 262.26 |          |        |
|             | 174->186 | 28.56 |             | 182->188 | 5.43   | f=0.0498    |          |        |
|             | 174->187 | 4.02  |             | 184->189 | 89.18  |             | 170->186 | 5.58   |
|             | 175->186 | 43.63 | S35: 300.42 |          |        |             | 170->187 | 16.06  |
|             | 175->187 | 4.05  | f=0.0012    |          |        |             | 171->186 | 4.12   |

|             |          |       |                     |          |       |                     |          |       |
|-------------|----------|-------|---------------------|----------|-------|---------------------|----------|-------|
|             | 171->188 | 4.74  |                     | 176->189 | 13.00 |                     | 170->186 | 4.98  |
|             | 183->190 | 49.90 |                     | 178->189 | 10.21 |                     | 171->186 | 4.66  |
|             | 184->190 | 19.60 |                     | 179->189 | 22.79 |                     | 171->187 | 19.54 |
| S47: 261.42 |          |       |                     | 180->189 | 14.25 |                     | 172->187 | 3.32  |
| f=0.0521    |          |       |                     | 182->189 | 23.31 |                     | 178->187 | 14.03 |
|             | 170->186 | 5.97  |                     | 185->193 | 4.98  |                     | 179->187 | 11.68 |
|             | 170->187 | 35.89 | S58: 239.96         |          |       |                     | 181->186 | 2.21  |
|             | 171->186 | 8.00  | f=0.0096            |          |       |                     | 181->187 | 7.03  |
|             | 171->187 | 2.38  |                     | 169->186 | 10.04 |                     | 182->186 | 4.60  |
|             | 171->188 | 10.53 |                     | 169->187 | 82.32 |                     | 182->187 | 27.95 |
|             | 183->190 | 16.83 |                     | 185->193 | 7.63  | T9: 428.74 f=0.0000 |          |       |
|             | 184->190 | 20.39 | S59: 239.85         |          |       |                     | 170->186 | 9.11  |
| S48: 258.59 |          |       | f=0.1045            |          |       |                     | 170->187 | 2.47  |
| f=0.0035    |          |       |                     | 169->187 | 4.43  |                     | 170->188 | 2.37  |
|             | 174->188 | 3.19  |                     | 179->189 | 2.64  |                     | 171->186 | 7.62  |
|             | 175->188 | 85.25 |                     | 182->189 | 2.68  |                     | 171->187 | 35.93 |
|             | 176->188 | 11.56 |                     | 185->192 | 6.25  |                     | 172->186 | 2.02  |
| S49: 255.91 |          |       |                     | 185->193 | 75.45 |                     | 172->187 | 6.54  |
| f=0.1272    |          |       |                     | 185->194 | 8.55  |                     | 173->186 | 2.30  |
|             | 170->186 | 21.66 | S60: 239.05         |          |       |                     | 174->187 | 1.95  |
|             | 170->187 | 5.00  | f=0.0078            |          |       |                     | 176->186 | 2.71  |
|             | 170->188 | 2.77  |                     | 183->191 | 97.28 |                     | 176->187 | 1.95  |
|             | 171->187 | 5.86  |                     | 185->191 | 2.72  |                     | 178->187 | 4.13  |
|             | 173->188 | 64.71 | T1: 652.43 f=0.0000 |          |       |                     | 179->187 | 2.83  |
| S50: 255.01 |          |       |                     | 183->186 | 4.41  |                     | 181->186 | 3.62  |
| f=0.0044    |          |       |                     | 184->186 | 3.37  |                     | 181->187 | 8.56  |
|             | 176->189 | 3.82  |                     | 185->186 | 84.14 |                     | 182->187 | 5.88  |
|             | 178->189 | 21.16 |                     | 185->187 | 8.08  | T10: 413.87         |          |       |
|             | 179->189 | 15.94 | T2: 623.39 f=0.0000 |          |       | f=0.0000            |          |       |
|             | 181->189 | 19.22 |                     | 183->186 | 3.12  |                     | 175->186 | 10.60 |
|             | 182->189 | 39.86 |                     | 183->187 | 2.07  |                     | 176->186 | 19.58 |
| S51: 252.34 |          |       |                     | 184->186 | 69.44 |                     | 179->186 | 3.32  |
| f=0.0034    |          |       |                     | 184->187 | 18.27 |                     | 180->186 | 10.12 |
|             | 174->188 | 96.66 |                     | 185->186 | 3.65  |                     | 181->186 | 27.11 |
|             | 175->188 | 3.34  |                     | 185->187 | 3.45  |                     | 181->187 | 3.49  |
| S52: 248.68 |          |       | T3: 615.66 f=0.0000 |          |       |                     | 182->186 | 25.78 |
| f=0.0230    |          |       |                     | 183->187 | 6.30  | T11: 402.42         |          |       |
|             | 183->191 | 3.51  |                     | 185->186 | 9.53  | f=0.0000            |          |       |
|             | 185->191 | 96.49 |                     | 185->187 | 84.17 |                     | 175->186 | 4.66  |
| S53: 247.88 |          |       | T4: 602.99 f=0.0000 |          |       |                     | 176->186 | 7.90  |
| f=0.2471    |          |       |                     | 183->186 | 84.48 |                     | 178->186 | 9.54  |
|             | 170->186 | 24.40 |                     | 183->187 | 6.42  |                     | 179->186 | 20.69 |
|             | 170->187 | 6.34  |                     | 184->186 | 9.10  |                     | 180->186 | 8.11  |
|             | 170->188 | 6.52  | T5: 584.24 f=0.0000 |          |       |                     | 181->186 | 4.96  |
|             | 171->187 | 8.87  |                     | 183->186 | 6.41  |                     | 182->186 | 41.78 |
|             | 173->188 | 53.86 |                     | 183->187 | 4.65  |                     | 182->187 | 2.36  |
| S54: 244.97 |          |       |                     | 184->186 | 17.94 | T12: 396.92         |          |       |
| f=0.0013    |          |       |                     | 184->187 | 68.88 | f=0.0000            |          |       |
|             | 169->186 | 86.36 |                     | 185->187 | 2.12  |                     | 175->187 | 2.78  |
|             | 169->187 | 10.41 | T6: 568.86 f=0.0000 |          |       |                     | 176->187 | 3.54  |
|             | 184->191 | 3.24  |                     | 183->186 | 4.76  |                     | 180->187 | 3.18  |
| S55: 243.71 |          |       |                     | 183->187 | 80.75 |                     | 181->187 | 47.11 |
| f=0.0001    |          |       |                     | 184->187 | 10.81 |                     | 182->187 | 43.39 |
|             | 169->186 | 2.52  |                     | 185->187 | 3.68  | T13: 389.66         |          |       |
|             | 184->191 | 97.48 | T7: 465.12 f=0.0000 |          |       | f=0.0000            |          |       |
| S56: 243.13 |          |       |                     | 176->186 | 5.58  |                     | 175->187 | 5.53  |
| f=0.0029    |          |       |                     | 178->186 | 19.45 |                     | 176->186 | 2.33  |
|             | 175->189 | 5.86  |                     | 178->187 | 3.86  |                     | 176->187 | 10.87 |
|             | 176->189 | 9.62  |                     | 179->186 | 13.93 |                     | 178->187 | 11.85 |
|             | 180->189 | 5.89  |                     | 179->187 | 3.13  |                     | 179->187 | 23.36 |
|             | 181->189 | 47.41 |                     | 181->186 | 17.96 |                     | 180->186 | 5.44  |
|             | 182->189 | 31.22 |                     | 181->187 | 2.86  |                     | 180->187 | 20.38 |
| S57: 240.33 |          |       |                     | 182->186 | 26.11 |                     | 181->187 | 3.20  |
| f=0.0086    |          |       |                     | 182->187 | 4.60  |                     | 182->187 | 17.04 |
|             | 169->187 | 5.20  |                     | 184->186 | 2.52  | T14: 385.09         |          |       |
|             | 175->189 | 6.26  | T8: 433.75 f=0.0000 |          |       | f=0.0000            |          |       |

|             |          |       |             |          |       |                     |          |       |
|-------------|----------|-------|-------------|----------|-------|---------------------|----------|-------|
|             | 176->186 | 2.27  |             | 179->187 | 5.06  |                     | 173->187 | 33.04 |
|             | 178->186 | 2.20  | T24: 358.48 |          |       |                     | 174->187 | 16.99 |
|             | 181->186 | 8.53  | f=0.0000    |          |       | <b>3P</b>           |          |       |
|             | 183->188 | 5.64  |             | 171->186 | 28.68 | S1: 628.66 f=0.0074 |          |       |
| T15: 383.54 | 185->188 | 81.36 |             | 172->186 | 6.80  |                     | 171->174 | 2.49  |
| f=0.0000    |          |       |             | 173->186 | 5.18  |                     | 173->174 | 91.34 |
|             |          |       |             | 173->187 | 9.24  |                     | 173->175 | 6.17  |
|             | 176->186 | 13.11 |             | 174->186 | 34.28 | S2: 607.87 f=0.0007 |          |       |
|             | 176->187 | 5.04  |             | 174->187 | 4.84  |                     | 172->174 | 86.23 |
|             | 178->186 | 15.95 |             | 183->188 | 10.97 |                     | 172->175 | 9.56  |
|             | 179->186 | 7.07  | T25: 357.12 |          |       |                     | 173->175 | 4.21  |
|             | 180->186 | 10.97 | f=0.0000    |          |       | S3: 603.90 f=0.0014 |          |       |
|             | 181->186 | 32.11 |             | 170->186 | 6.46  |                     | 172->174 | 3.35  |
|             | 182->186 | 3.68  |             | 171->187 | 10.55 |                     | 173->174 | 6.28  |
| T16: 381.15 | 185->188 | 12.06 |             | 172->187 | 2.84  |                     | 173->175 | 90.37 |
| f=0.0000    |          |       |             | 173->186 | 41.84 | S4: 577.03 f=0.0004 |          |       |
|             |          |       |             | 173->187 | 2.19  |                     | 172->174 | 10.28 |
|             | 176->186 | 19.15 |             | 174->186 | 4.38  |                     | 172->175 | 89.72 |
|             | 176->187 | 2.94  |             | 174->187 | 2.27  | S5: 545.92 f=0.0388 |          |       |
|             | 178->187 | 2.45  |             | 175->186 | 5.69  |                     | 171->174 | 81.66 |
|             | 179->186 | 5.58  |             | 176->186 | 5.20  |                     | 171->175 | 18.34 |
|             | 180->186 | 66.33 |             | 178->186 | 2.86  | S6: 541.21 f=0.0349 |          |       |
|             | 181->187 | 3.54  |             | 178->187 | 4.91  |                     | 171->174 | 14.53 |
| T17: 374.20 |          |       |             | 179->186 | 2.65  |                     | 171->175 | 85.47 |
| f=0.0000    |          |       |             | 179->187 | 5.72  | S7: 447.25 f=0.0019 |          |       |
|             |          |       |             | 183->188 | 2.45  |                     | 167->174 | 3.16  |
|             | 176->186 | 5.71  |             |          |       |                     | 168->174 | 24.15 |
|             | 176->187 | 27.68 | T26: 356.78 |          |       |                     | 168->175 | 2.56  |
|             | 178->187 | 16.25 | f=0.0000    |          |       |                     | 169->174 | 30.61 |
|             | 179->187 | 2.60  |             | 173->186 | 11.74 |                     | 169->175 | 3.23  |
|             | 180->186 | 3.84  |             | 176->187 | 9.01  |                     | 170->174 | 33.04 |
|             | 180->187 | 13.61 |             | 178->186 | 2.93  |                     | 170->175 | 3.25  |
|             | 181->186 | 2.24  |             | 178->187 | 38.10 |                     |          |       |
|             | 181->187 | 25.59 |             | 179->186 | 2.56  | S8: 420.98 f=0.0007 |          |       |
|             | 182->187 | 2.48  |             | 179->187 | 35.65 |                     | 168->175 | 24.09 |
| T18: 373.40 |          |       |             |          |       |                     | 169->174 | 3.45  |
| f=0.0000    |          |       |             |          |       |                     | 169->175 | 27.16 |
|             | 177->186 | 73.99 | T27: 354.00 | 171->186 | 2.33  |                     | 170->174 | 4.54  |
|             | 177->187 | 26.01 | f=0.0000    | 173->186 | 5.34  |                     | 170->175 | 40.77 |
|             |          |       |             | 174->186 | 8.68  | S9: 404.96 f=0.0094 |          |       |
| T19: 372.24 |          |       |             | 175->186 | 64.23 |                     | 166->174 | 6.51  |
| f=0.0000    |          |       |             | 175->187 | 4.70  |                     | 167->174 | 34.33 |
|             | 180->187 | 2.21  |             | 176->186 | 11.35 |                     | 167->175 | 2.43  |
|             | 183->188 | 8.79  |             | 179->186 | 3.38  |                     | 168->174 | 25.01 |
|             | 184->188 | 84.94 |             |          |       |                     | 169->174 | 24.83 |
|             | 185->188 | 4.07  | T28: 346.78 |          |       |                     | 170->174 | 6.89  |
| T20: 370.66 |          |       | f=0.0000    |          |       |                     |          |       |
| f=0.0000    |          |       |             | 174->187 | 2.20  | S10: 397.70         |          |       |
|             | 176->187 | 26.19 |             | 175->186 | 9.31  | f=0.0005            |          |       |
|             | 179->187 | 10.00 |             | 175->187 | 78.66 |                     | 167->174 | 3.07  |
|             | 180->187 | 63.80 |             | 176->187 | 9.84  |                     | 168->174 | 22.76 |
| T21: 368.97 |          |       |             |          |       |                     | 169->174 | 17.88 |
| f=0.0000    |          |       |             |          |       |                     | 170->174 | 56.29 |
|             | 177->186 | 26.58 | T29: 346.01 | 171->186 | 23.00 | S11: 388.88         |          |       |
|             | 177->187 | 73.42 | f=0.0000    | 171->187 | 6.73  | f=0.0007            |          |       |
|             |          |       |             | 172->186 | 7.01  |                     | 166->175 | 2.28  |
| T22: 366.78 |          |       |             | 173->187 | 5.50  |                     | 167->175 | 6.98  |
| f=0.0000    |          |       |             | 174->186 | 41.72 |                     | 169->175 | 50.98 |
|             | 171->186 | 4.38  |             | 174->187 | 2.92  |                     | 170->175 | 39.76 |
|             | 177->187 | 2.53  |             | 175->186 | 7.07  | S12: 385.14         |          |       |
|             | 183->188 | 73.56 |             | 175->187 | 6.05  | f=0.0002            |          |       |
|             | 184->188 | 13.84 |             |          |       |                     | 166->175 | 2.64  |
|             | 185->188 | 5.69  | T30: 335.82 |          |       |                     | 167->175 | 18.93 |
| T23: 361.02 |          |       | f=0.0000    | 170->186 | 11.23 |                     | 168->174 | 3.27  |
| f=0.0000    |          |       |             | 170->187 | 11.37 |                     | 168->175 | 57.67 |
|             | 176->186 | 4.32  |             | 171->186 | 2.31  |                     | 170->175 | 17.49 |
|             | 178->186 | 44.46 |             | 171->187 | 3.07  | S13: 380.26         |          |       |
|             | 178->187 | 5.07  |             | 173->186 | 22.00 | f=0.0054            |          |       |
|             | 179->186 | 41.09 |             |          |       |                     |          |       |

|                         |                                                                                                       |                         |                                                                                                                                                                          |                         |                                                                                                                                         |
|-------------------------|-------------------------------------------------------------------------------------------------------|-------------------------|--------------------------------------------------------------------------------------------------------------------------------------------------------------------------|-------------------------|-----------------------------------------------------------------------------------------------------------------------------------------|
| S14: 374.26<br>f=0.0002 | 173->176 100.00                                                                                       |                         | 162->175 7.67<br>164->175 2.94                                                                                                                                           | f=0.0007                | 159->174 4.81<br>159->175 44.38<br>160->174 4.26<br>160->175 34.62<br>161->175 2.91<br>162->175 5.82<br>169->176 3.19                   |
|                         | 164->174 6.56<br>167->174 40.96<br>167->175 6.24<br>168->174 19.33<br>169->174 21.06<br>172->176 5.84 | S26: 302.15<br>f=0.0008 | 158->174 2.90<br>158->175 5.38<br>159->174 24.37<br>160->174 7.78<br>160->175 3.80<br>161->174 5.04<br>161->175 2.75<br>162->174 6.93<br>162->175 38.92<br>172->177 2.12 | S36: 282.35<br>f=0.0018 | 159->175 2.97<br>160->175 2.11<br>161->174 2.96<br>166->176 2.85<br>167->176 12.62<br>168->176 3.11<br>169->176 44.88<br>170->176 28.50 |
| S15: 369.62<br>f=0.0003 | 167->174 3.02<br>172->176 96.98                                                                       |                         | 162->175 3.00<br>172->177 97.00                                                                                                                                          |                         |                                                                                                                                         |
| S16: 364.26<br>f=0.0001 | 167->174 7.38<br>167->175 63.24<br>168->175 13.37<br>169->175 16.01                                   | S27: 300.99<br>f=0.0001 |                                                                                                                                                                          |                         |                                                                                                                                         |
| S17: 356.69<br>f=0.0061 | 165->174 15.38<br>171->176 84.62                                                                      | S28: 300.38<br>f=0.0019 | 158->175 12.63<br>159->174 18.88<br>159->175 12.15<br>160->174 16.15<br>161->175 5.46<br>162->175 32.29<br>172->177 2.45                                                 | S37: 280.71<br>f=0.0002 | 160->174 2.84<br>161->174 46.76<br>161->175 4.52<br>162->174 8.26<br>167->176 4.05<br>168->176 15.48<br>169->176 2.39<br>170->176 15.70 |
| S18: 352.63<br>f=0.0041 | 165->174 69.10<br>165->175 6.70<br>166->174 5.33<br>167->174 2.96<br>171->176 15.90                   | S29: 300.04<br>f=0.0006 | 167->176 2.83<br>168->176 24.82<br>169->176 31.42<br>170->176 40.93                                                                                                      | S38: 280.01<br>f=0.0006 | 161->174 26.39<br>161->175 3.88<br>162->174 2.23<br>167->176 14.16<br>168->176 39.87<br>170->176 13.46                                  |
| S19: 350.34<br>f=0.0002 | 164->174 74.92<br>164->175 5.93<br>166->174 14.13<br>167->174 5.01                                    | S30: 294.26<br>f=0.0008 | 159->175 6.23<br>160->175 4.81<br>171->177 88.96                                                                                                                         | S39: 277.35<br>f=0.0001 | 160->175 5.17<br>161->174 8.37<br>161->175 77.39<br>162->175 9.08                                                                       |
| S20: 346.82<br>f=0.0025 | 164->174 14.09<br>165->174 4.82<br>166->174 74.97<br>166->175 2.62<br>168->174 3.50                   | S31: 293.78<br>f=0.0002 | 163->174 100.00                                                                                                                                                          |                         |                                                                                                                                         |
| S21: 341.44<br>f=0.0000 | 166->174 3.75<br>166->175 92.77<br>167->175 3.48                                                      | S32: 287.86<br>f=0.0045 | 158->174 5.09<br>159->175 4.87<br>160->174 4.54<br>163->175 81.49<br>171->177 4.01                                                                                       | S40: 276.81<br>f=0.0026 | 173->178 100.00                                                                                                                         |
| S22: 332.47<br>f=0.0012 | 165->174 8.62<br>165->175 91.38                                                                       | S33: 287.16<br>f=0.0136 |                                                                                                                                                                          | S41: 268.72<br>f=0.0005 | 167->176 63.79<br>168->176 16.69<br>169->176 19.52                                                                                      |
| S23: 330.81<br>f=0.0062 | 162->174 2.47<br>164->174 6.94<br>164->175 90.58                                                      | S34: 286.00<br>f=0.0013 | 158->174 21.49<br>159->175 10.73<br>160->174 3.70<br>160->175 34.93<br>163->175 17.92<br>171->177 11.24                                                                  | S42: 266.30<br>f=0.0185 | 171->178 18.25<br>172->178 81.75                                                                                                        |
| S24: 308.91<br>f=0.0004 | 173->177 100.00                                                                                       |                         | 159->174 35.21<br>159->175 3.15<br>160->174 44.50<br>160->175 5.89<br>161->174 3.63<br>162->174 5.34<br>163->175 2.28                                                    | S43: 263.13<br>f=0.0119 | 171->178 83.74<br>172->178 16.26                                                                                                        |
| S25: 308.07<br>f=0.0115 | 158->175 3.25<br>160->174 5.96<br>161->174 6.85<br>162->174 73.32                                     | S35: 282.86             |                                                                                                                                                                          | S44: 261.65<br>f=0.0862 | 158->174 6.74<br>158->175 55.72<br>159->174 8.17<br>159->176 9.38<br>160->174 4.74<br>160->176 6.53                                     |

|             |          |       |                     |          |       |                     |                |
|-------------|----------|-------|---------------------|----------|-------|---------------------|----------------|
|             | 162->176 | 2.59  |                     | 154->174 | 2.62  | T5: 579.56 f=0.0000 |                |
|             | 171->178 | 2.53  |                     | 157->174 | 70.58 |                     | 171->174 8.85  |
|             | 172->178 | 3.60  |                     | 157->175 | 4.80  |                     | 171->175 2.18  |
| S45: 256.02 |          |       |                     | 167->177 | 4.86  |                     | 172->174 11.56 |
| f=0.0255    |          |       |                     | 168->177 | 2.44  |                     | 172->175 77.41 |
|             | 158->174 | 3.90  |                     | 169->177 | 9.57  | T6: 559.69 f=0.0000 |                |
|             | 164->176 | 11.98 |                     | 171->179 | 5.12  |                     | 171->174 2.80  |
|             | 166->176 | 79.81 | S55: 239.22         |          |       |                     | 171->175 87.36 |
|             | 167->176 | 4.30  | f=0.0021            |          |       |                     | 172->175 6.36  |
| S46: 255.56 |          |       |                     | 167->177 | 10.69 |                     | 173->175 3.48  |
| f=0.1222    |          |       |                     | 168->177 | 38.95 | T7: 461.46 f=0.0000 |                |
|             | 158->174 | 20.70 |                     | 169->177 | 6.42  |                     | 167->174 3.84  |
|             | 158->175 | 3.21  |                     | 170->177 | 43.94 |                     | 168->174 23.66 |
|             | 158->176 | 2.59  | S56: 237.51         |          |       |                     | 168->175 3.91  |
|             | 159->175 | 3.44  | f=0.0183            |          |       |                     | 169->174 30.25 |
|             | 160->175 | 2.45  |                     | 157->174 | 5.92  |                     | 169->175 3.47  |
|             | 164->176 | 35.12 |                     | 171->179 | 88.56 |                     | 170->174 28.39 |
|             | 165->176 | 16.19 |                     | 171->181 | 3.26  |                     | 170->175 3.51  |
|             | 166->176 | 16.29 |                     | 173->179 | 2.26  |                     | 172->174 2.98  |
| S47: 253.80 |          |       | S57: 236.75         |          |       | T8: 431.71 f=0.0000 |                |
| f=0.0030    |          |       | f=0.0592            |          |       |                     | 152->174 2.12  |
|             | 164->176 | 2.94  |                     | 157->175 | 3.28  |                     | 152->176 2.22  |
|             | 167->177 | 2.48  |                     | 172->179 | 3.77  |                     | 158->174 9.58  |
|             | 168->177 | 25.87 |                     | 172->180 | 9.69  |                     | 158->176 2.40  |
|             | 169->177 | 30.21 |                     | 172->181 | 75.74 |                     | 159->174 3.18  |
|             | 170->177 | 38.51 |                     | 172->182 | 3.58  |                     | 159->175 22.34 |
| S48: 252.17 |          |       |                     | 172->183 | 3.94  |                     | 160->174 3.21  |
| f=0.0040    |          |       | S58: 235.68         |          |       |                     | 160->175 16.03 |
|             | 164->176 | 9.51  | f=0.0129            |          |       |                     | 162->175 5.79  |
|             | 165->176 | 86.13 |                     | 153->174 | 2.94  |                     | 168->175 13.80 |
|             | 166->176 | 4.35  |                     | 154->175 | 2.22  |                     | 169->175 5.47  |
| S49: 248.25 |          |       |                     | 157->174 | 5.53  |                     | 170->175 13.87 |
| f=0.0365    |          |       |                     | 157->175 | 77.21 | T9: 425.51 f=0.0000 |                |
|             | 164->176 | 2.78  |                     | 172->181 | 3.43  |                     | 158->174 5.61  |
|             | 171->179 | 2.41  |                     | 173->180 | 8.67  |                     | 159->175 13.18 |
|             | 173->179 | 94.80 | S59: 234.38         |          |       |                     | 160->175 8.82  |
| S50: 247.65 |          |       | f=0.0025            |          |       |                     | 162->175 3.89  |
| f=0.2129    |          |       |                     | 157->175 | 8.73  |                     | 167->174 4.43  |
|             | 158->174 | 21.51 |                     | 173->180 | 82.95 |                     | 167->175 3.23  |
|             | 158->175 | 3.84  |                     | 173->181 | 8.32  |                     | 168->175 10.92 |
|             | 158->176 | 5.62  | S60: 233.10         |          |       |                     | 169->174 6.36  |
|             | 159->175 | 4.59  | f=0.0033            |          |       |                     | 169->175 21.53 |
|             | 160->175 | 3.55  |                     | 159->176 | 12.58 |                     | 170->174 2.43  |
|             | 164->176 | 51.14 |                     | 161->176 | 8.75  |                     | 170->175 19.62 |
|             | 172->181 | 2.94  |                     | 162->176 | 72.10 | T10: 408.60         |                |
|             | 173->179 | 6.80  |                     | 170->178 | 6.57  | f=0.0000            |                |
| S51: 243.37 |          |       | T1: 648.83 f=0.0000 |          |       |                     | 166->174 6.69  |
| f=0.0032    |          |       |                     | 171->174 | 3.27  |                     | 167->174 34.41 |
|             | 172->179 | 96.95 |                     | 172->174 | 3.70  |                     | 168->174 26.17 |
|             | 172->181 | 3.05  |                     | 173->174 | 88.52 |                     | 169->174 19.86 |
| S52: 241.57 |          |       |                     | 173->175 | 4.51  |                     | 169->175 2.75  |
| f=0.1052    |          |       | T2: 620.83 f=0.0000 |          |       |                     | 170->174 10.13 |
|             | 173->180 | 9.92  |                     | 172->174 | 79.12 | T11: 397.80         |                |
|             | 173->181 | 84.10 |                     | 172->175 | 12.50 | f=0.0000            |                |
|             | 173->182 | 3.71  |                     | 173->174 | 3.07  |                     | 167->174 3.76  |
|             | 173->183 | 2.28  |                     | 173->175 | 5.31  |                     | 168->174 23.43 |
| S53: 240.97 |          |       | T3: 611.14 f=0.0000 |          |       |                     | 169->174 15.10 |
| f=0.0028    |          |       |                     | 171->175 | 5.34  |                     | 170->174 57.72 |
|             | 157->174 | 11.98 |                     | 172->175 | 2.55  | T12: 389.12         |                |
|             | 166->177 | 4.56  |                     | 173->174 | 5.88  | f=0.0000            |                |
|             | 167->177 | 20.78 |                     | 173->175 | 86.22 |                     | 166->175 2.29  |
|             | 168->177 | 11.02 | T4: 591.36 f=0.0000 |          |       |                     | 167->175 7.11  |
|             | 169->177 | 35.01 |                     | 171->174 | 85.81 |                     | 169->175 48.07 |
|             | 170->177 | 16.64 |                     | 171->175 | 4.53  |                     | 170->175 42.53 |
| S54: 240.40 |          |       |                     | 172->174 | 6.36  | T13: 385.67         |                |
| f=0.0010    |          |       |                     | 172->175 | 3.30  | f=0.0000            |                |



|             |          |       |             |          |          |             |          |
|-------------|----------|-------|-------------|----------|----------|-------------|----------|
|             | 166->175 | 2.59  | f=0.0000    |          | f=0.0000 |             |          |
|             | 167->175 | 18.87 |             | 159->174 | 3.32     | 162->175    | 4.68     |
|             | 168->174 | 3.07  |             | 160->174 | 5.49     | 168->176    | 21.06    |
|             | 168->175 | 56.27 |             | 164->174 | 4.39     | 169->176    | 23.93    |
|             | 170->175 | 19.20 |             | 165->174 | 27.07    | 170->176    | 30.20    |
| T14: 383.82 |          |       |             | 165->175 | 3.44     | 172->177    | 20.13    |
| f=0.0000    |          |       |             | 166->174 | 48.21    |             |          |
|             | 171->176 | 5.46  |             | 166->175 | 2.40     | <b>4P</b>   |          |
|             | 173->176 | 94.54 |             | 167->174 | 5.69     | S1: 635.48  | f=0.0029 |
| T15: 374.84 |          |       | T22: 346.36 |          |          |             | 152->153 |
| f=0.0000    |          |       | f=0.0000    |          |          | S2: 608.33  | f=0.0002 |
|             | 164->174 | 7.12  |             | 159->174 | 6.62     |             | 151->153 |
|             | 167->174 | 37.34 |             | 160->174 | 7.83     |             | 152->154 |
|             | 167->175 | 6.24  |             | 164->174 | 8.72     | S3: 602.57  | f=0.0001 |
|             | 168->174 | 17.34 |             | 165->174 | 24.70    |             | 151->153 |
|             | 169->174 | 23.14 |             | 165->175 | 3.03     | S4: 574.44  | f=0.0000 |
|             | 172->176 | 8.82  |             | 166->174 | 49.10    |             | 152->154 |
| T16: 370.85 |          |       | T23: 341.50 |          |          | S5: 523.54  | f=0.0090 |
| f=0.0000    |          |       | f=0.0000    |          |          |             | 151->154 |
|             | 167->174 | 5.25  |             | 166->174 | 3.58     |             | 150->153 |
|             | 171->176 | 4.90  |             | 166->175 | 92.98    | S6: 520.99  | f=0.0682 |
|             | 172->176 | 87.01 |             | 167->175 | 3.44     |             | 150->153 |
|             | 173->176 | 2.84  | T24: 334.85 |          |          |             | 150->154 |
| T17: 364.69 |          |       | f=0.0000    |          |          | S7: 436.31  | f=0.0002 |
| f=0.0000    |          |       |             | 158->174 | 26.91    |             | 148->153 |
|             | 164->175 | 2.56  |             | 158->175 | 11.74    |             | 149->153 |
|             | 167->174 | 6.32  |             | 164->174 | 16.13    |             | 149->154 |
|             | 167->175 | 58.73 |             | 164->175 | 5.16     | S8: 412.21  | f=0.0006 |
|             | 168->174 | 2.51  |             | 165->174 | 6.88     |             | 148->153 |
|             | 168->175 | 11.40 |             | 165->175 | 33.18    |             | 148->154 |
|             | 169->174 | 3.08  | T25: 333.21 |          |          |             | 149->154 |
|             | 169->175 | 15.40 | f=0.0000    |          |          | S9: 407.30  | f=0.0098 |
| T18: 364.09 |          |       |             | 158->174 | 32.73    |             | 148->153 |
| f=0.0000    |          |       |             | 159->174 | 4.67     |             | 148->154 |
|             | 152->175 | 2.45  |             | 160->174 | 3.32     |             | 149->153 |
|             | 159->174 | 5.25  |             | 164->175 | 54.49    |             | 149->154 |
|             | 160->174 | 5.34  |             | 165->175 | 4.79     | S10: 389.99 |          |
|             | 162->174 | 3.20  | T26: 332.20 |          |          | f=0.0004    |          |
|             | 164->175 | 2.46  | f=0.0000    |          |          |             | 148->154 |
|             | 171->176 | 69.25 |             | 158->174 | 7.34     |             | 149->154 |
|             | 172->176 | 7.10  |             | 158->175 | 2.99     | S11: 381.52 |          |
|             | 173->176 | 4.95  |             | 159->175 | 2.64     | f=0.0044    |          |
| T19: 356.63 |          |       |             | 160->175 | 4.00     |             | 152->155 |
| f=0.0000    |          |       |             | 164->174 | 10.21    |             | 152->156 |
|             | 158->174 | 3.39  |             | 164->175 | 18.27    | S12: 371.06 |          |
|             | 159->174 | 18.37 |             | 165->174 | 2.68     | f=0.0118    |          |
|             | 160->174 | 12.06 |             | 165->175 | 51.88    |             | 152->155 |
|             | 162->174 | 7.01  | T27: 318.90 |          |          |             | 152->156 |
|             | 164->174 | 30.64 | f=0.0000    |          |          |             | 152->157 |
|             | 164->175 | 9.21  |             | 152->175 | 2.12     | S13: 368.38 |          |
|             | 165->174 | 3.19  |             | 158->174 | 10.11    | f=0.0003    |          |
|             | 167->175 | 2.20  |             | 158->175 | 78.44    |             | 151->155 |
|             | 171->176 | 13.94 |             | 159->176 | 3.27     |             | 151->156 |
| T20: 355.22 |          |       |             | 160->176 | 2.31     | S14: 362.99 |          |
| f=0.0000    |          |       |             | 164->175 | 3.74     | f=0.0078    |          |
|             | 158->174 | 9.20  | T28: 313.10 |          |          |             | 152->156 |
|             | 159->174 | 2.30  | f=0.0000    |          |          |             | 152->157 |
|             | 159->175 | 8.21  |             | 159->174 | 27.03    | S15: 354.02 |          |
|             | 160->174 | 2.77  |             | 161->174 | 9.55     | f=0.0018    |          |
|             | 160->175 | 6.33  |             | 162->174 | 59.60    |             | 147->153 |
|             | 162->175 | 3.12  |             | 162->175 | 3.83     |             | 151->155 |
|             | 164->174 | 23.00 | T29: 309.96 |          |          |             | 151->156 |
|             | 165->174 | 35.80 | f=0.0000    |          |          |             | 151->157 |
|             | 165->175 | 2.89  |             | 171->177 | 3.23     | S16: 353.70 |          |
|             | 171->176 | 6.39  |             | 173->177 | 96.77    | f=0.0015    |          |
| T21: 349.58 |          |       | T30: 302.66 |          |          |             | 147->153 |



|                         |          |        |                         |          |        |                         |          |       |
|-------------------------|----------|--------|-------------------------|----------|--------|-------------------------|----------|-------|
|                         | 148->155 | 2.94   |                         | 138->154 | 6.62   |                         | 152->155 | 23.08 |
|                         | 149->156 | 4.47   |                         | 140->153 | 2.98   |                         | 152->156 | 71.33 |
| S48: 282.61<br>f=0.0031 | 150->161 | 6.86   | S60: 264.71<br>f=0.0013 |          |        | T14: 373.03<br>f=0.0000 |          |       |
|                         |          |        |                         | 138->153 | 6.28   |                         | 148->157 | 3.94  |
|                         | 148->155 | 34.93  |                         | 138->154 | 90.83  |                         | 150->157 | 5.68  |
|                         | 149->156 | 3.92   |                         | 140->154 | 2.89   |                         | 152->157 | 90.39 |
|                         | 150->160 | 33.37  | T1: 652.70 f=0.0000     |          |        | T15: 369.66<br>f=0.0000 |          |       |
|                         | 150->161 | 27.78  |                         | 152->153 | 100.00 |                         |          |       |
| S49: 281.58<br>f=0.0050 |          |        | T2: 619.63 f=0.0000     |          |        |                         | 151->155 | 94.68 |
|                         |          |        |                         | 149->153 | 3.01   |                         | 151->156 | 5.32  |
|                         | 148->155 | 20.26  |                         | 151->153 | 82.06  | T16: 363.83<br>f=0.0000 |          |       |
|                         | 148->156 | 3.14   |                         | 152->154 | 14.93  |                         |          |       |
|                         | 149->156 | 46.38  | T3: 608.51 f=0.0000     |          |        |                         | 134->154 | 3.53  |
|                         | 149->157 | 2.39   |                         | 151->153 | 14.36  |                         | 141->153 | 9.95  |
|                         | 150->160 | 17.20  |                         | 152->154 | 85.64  |                         | 143->153 | 12.05 |
|                         | 150->161 | 10.62  | T4: 584.14 f=0.0000     |          |        |                         | 144->153 | 4.61  |
| S50: 280.59<br>f=0.0008 |          |        |                         | 150->153 | 76.20  |                         | 145->153 | 2.39  |
|                         |          |        |                         | 151->154 | 23.80  |                         | 146->154 | 3.63  |
|                         | 140->153 | 5.51   | T5: 574.81 f=0.0000     |          |        |                         | 147->153 | 45.55 |
|                         | 141->154 | 8.59   |                         | 150->153 | 25.49  |                         | 150->155 | 18.28 |
|                         | 142->153 | 13.72  |                         | 151->154 | 74.51  | T17: 357.91<br>f=0.0000 |          |       |
|                         | 142->154 | 72.18  | T6: 547.01 f=0.0000     |          |        |                         |          |       |
| S51: 278.79<br>f=0.0250 |          |        |                         | 143->154 | 2.95   |                         | 143->153 | 2.36  |
|                         |          |        |                         | 150->154 | 97.05  |                         | 147->153 | 41.37 |
|                         | 148->156 | 86.35  | T7: 455.89 f=0.0000     |          |        |                         | 150->155 | 53.38 |
|                         | 149->157 | 7.17   |                         | 148->153 | 10.62  |                         | 150->156 | 2.90  |
|                         | 150->162 | 6.48   |                         | 149->153 | 82.03  | T18: 356.80<br>f=0.0000 |          |       |
| S52: 277.68<br>f=0.0039 |          |        |                         | 149->154 | 3.69   |                         |          |       |
|                         |          |        |                         | 151->153 | 3.66   |                         | 137->153 | 10.33 |
|                         | 148->156 | 11.33  | T8: 428.14 f=0.0000     |          |        |                         | 141->154 | 6.19  |
|                         | 149->157 | 27.38  |                         | 133->161 | 1.78   |                         | 143->154 | 3.95  |
|                         | 150->162 | 61.29  |                         | 134->153 | 2.69   |                         | 146->153 | 65.41 |
| S53: 277.03<br>f=0.0063 |          |        |                         | 134->155 | 2.18   |                         | 151->155 | 4.54  |
|                         |          |        |                         | 137->153 | 14.52  |                         | 151->156 | 9.58  |
|                         | 149->156 | 2.33   |                         | 137->155 | 2.76   | T19: 355.53<br>f=0.0000 |          |       |
|                         | 149->157 | 63.50  |                         | 140->154 | 4.25   |                         |          |       |
|                         | 150->162 | 34.17  |                         | 141->154 | 31.72  |                         | 146->153 | 9.39  |
| S54: 275.42<br>f=0.0005 |          |        |                         | 143->154 | 21.68  |                         | 151->155 | 3.09  |
|                         |          |        |                         | 144->154 | 5.19   |                         | 151->156 | 83.82 |
|                         | 138->153 | 2.71   |                         | 145->154 | 3.73   |                         | 151->157 | 3.69  |
|                         | 140->153 | 78.78  |                         | 146->153 | 4.40   | T20: 350.82<br>f=0.0000 |          |       |
|                         | 140->154 | 3.98   |                         | 147->154 | 1.95   |                         |          |       |
|                         | 141->153 | 12.04  |                         | 150->154 | 3.16   |                         | 139->156 | 3.48  |
|                         | 142->154 | 2.50   | T9: 423.05 f=0.0000     |          |        |                         | 139->159 | 3.03  |
| S55: 273.58<br>f=0.0105 |          |        |                         | 148->153 | 49.10  |                         | 141->153 | 13.81 |
|                         |          |        |                         | 148->154 | 2.17   |                         | 143->153 | 12.62 |
|                         | 139->153 | 53.26  |                         | 149->154 | 48.74  |                         | 147->153 | 8.91  |
|                         | 140->153 | 2.31   | T10: 414.16<br>f=0.0000 |          |        |                         | 150->155 | 19.20 |
|                         | 148->157 | 44.43  |                         |          |        |                         | 150->156 | 25.94 |
| S56: 273.23<br>f=0.0127 |          |        |                         | 148->153 | 38.09  |                         | 152->156 | 9.75  |
|                         |          |        |                         | 148->154 | 7.71   |                         | 152->159 | 3.26  |
|                         | 139->153 | 44.96  |                         | 149->153 | 13.62  | T21: 348.91<br>f=0.0000 |          |       |
|                         | 148->157 | 55.04  |                         | 149->154 | 40.58  |                         |          |       |
| S57: 272.39<br>f=0.0001 |          |        | T11: 391.27<br>f=0.0000 |          |        |                         | 141->153 | 19.98 |
|                         |          |        |                         |          |        |                         | 143->153 | 14.25 |
|                         | 138->154 | 2.93   |                         | 148->154 | 91.87  |                         | 147->153 | 7.08  |
|                         | 140->153 | 2.44   |                         | 149->154 | 8.13   |                         | 150->155 | 7.87  |
|                         | 140->154 | 84.26  | T12: 385.06<br>f=0.0000 |          |        |                         | 150->156 | 34.57 |
|                         | 141->154 | 10.37  |                         |          |        |                         | 151->157 | 10.69 |
| S58: 270.09<br>f=0.0000 |          |        |                         | 150->156 | 3.99   |                         | 152->156 | 5.55  |
|                         |          |        |                         | 152->155 | 80.09  | T22: 348.42<br>f=0.0000 |          |       |
|                         | 139->154 | 100.00 |                         | 152->156 | 15.93  |                         |          |       |
| S59: 267.77<br>f=0.0002 |          |        | T13: 381.15<br>f=0.0000 |          |        |                         | 150->156 | 4.09  |
|                         |          |        |                         |          |        |                         | 151->156 | 5.54  |
|                         | 138->153 | 90.40  |                         | 150->156 | 5.59   |                         | 151->157 | 90.38 |

|                         |                |                         |                |                         |                |
|-------------------------|----------------|-------------------------|----------------|-------------------------|----------------|
| T23: 343.56<br>f=0.0000 |                |                         | 152->158 3.53  |                         | 146->154 80.98 |
|                         | 138->157 4.45  | T25: 335.65             | 152->159 7.56  | T29: 330.17<br>f=0.0000 |                |
|                         | 138->159 3.57  | f=0.0000                |                |                         | 138->156 4.43  |
|                         | 140->158 2.56  |                         | 144->162 2.82  |                         | 139->156 4.43  |
|                         | 140->159 2.90  |                         | 147->154 2.91  |                         | 139->159 5.17  |
|                         | 142->158 4.65  |                         | 150->156 4.57  |                         | 140->158 5.00  |
|                         | 142->160 4.04  |                         | 150->157 17.64 |                         | 142->160 3.27  |
|                         | 142->162 2.69  |                         | 152->158 72.07 |                         | 145->157 4.09  |
|                         | 145->157 10.13 | T26: 335.37             |                |                         | 150->155 2.46  |
|                         | 148->157 8.43  | f=0.0000                |                |                         | 150->156 11.03 |
|                         | 150->156 3.86  |                         | 137->153 24.50 |                         | 150->157 28.54 |
|                         | 150->157 29.46 |                         | 146->153 7.62  |                         | 152->158 23.14 |
|                         | 152->157 15.92 |                         | 147->154 65.31 |                         | 152->159 8.46  |
|                         | 152->158 7.34  |                         | 152->158 2.58  | T30: 326.11<br>f=0.0000 |                |
| T24: 338.94<br>f=0.0000 |                | T27: 333.23<br>f=0.0000 |                |                         | 138->157 5.84  |
|                         | 138->157 4.81  |                         | 137->153 45.99 |                         | 138->158 2.62  |
|                         | 140->156 3.66  |                         | 137->154 2.42  |                         | 139->156 5.88  |
|                         | 140->157 7.00  |                         | 141->154 5.03  |                         | 139->159 5.50  |
|                         | 144->157 2.46  |                         | 143->154 4.79  |                         | 140->160 5.61  |
|                         | 144->158 3.58  |                         | 146->153 13.42 |                         | 142->158 13.73 |
|                         | 144->162 27.35 |                         | 147->154 28.35 |                         | 145->157 2.88  |
|                         | 145->156 11.07 | T28: 331.15             |                |                         | 145->159 2.57  |
|                         | 145->157 5.37  | f=0.0000                |                |                         | 148->156 4.19  |
|                         | 145->159 14.58 |                         | 137->153 2.75  |                         | 148->157 4.01  |
|                         | 145->160 3.18  |                         | 137->154 8.61  |                         | 150->156 15.66 |
|                         | 148->159 2.78  |                         | 141->153 4.07  |                         | 150->157 31.52 |
|                         | 150->156 3.07  |                         | 143->153 3.59  |                         |                |

#### DFT optimised geometries :

|           |             |             |             |            |             |             |             |
|-----------|-------------|-------------|-------------|------------|-------------|-------------|-------------|
| <b>1N</b> |             |             | C           | 5.62243600 | 1.94565500  | 0.43860500  |             |
| Cu        | -0.93219500 | -0.76730900 | 0.15993200  | C          | 3.08591300  | 2.98133100  | 1.21444100  |
| I         | -0.33609400 | -2.48817200 | 2.13441300  | C          | 4.48700900  | 1.04712700  | 0.92128700  |
| C         | -1.38885000 | 1.67297400  | 2.48010600  | C          | 2.05159300  | 0.79210700  | 0.88147300  |
| H         | -1.51454800 | 2.36371500  | 3.31751400  | C          | -0.89748400 | 5.22050400  | -1.04952600 |
| H         | -0.84228200 | 2.18285300  | 1.67856400  | C          | 0.17836500  | 4.25346800  | -1.53756500 |
| H         | -0.79030100 | 0.81520100  | 2.80715200  | C          | 5.17510000  | -2.79793600 | -1.29292100 |
| C         | -1.13192500 | -3.00184800 | -2.34086700 | C          | 0.90510300  | 1.95106600  | -1.55915700 |
| H         | -0.48815700 | -2.14766400 | -2.56969300 | C          | -3.24108000 | 5.78984000  | -1.21010900 |
| H         | -0.66956100 | -3.53475900 | -1.50282000 | C          | 4.28097800  | -1.76218500 | -1.97288600 |
| H         | -1.16585700 | -3.66680800 | -3.20727200 | C          | 2.26850100  | -0.45349700 | -1.74906200 |
| N         | -2.69048200 | 0.30199200  | 0.96352600  | C          | 5.29173600  | -5.07171000 | -0.49154800 |
| N         | -2.58192500 | -1.58887900 | -1.00655000 | C          | -2.53373700 | 3.47788000  | -1.20248000 |
| C         | -2.50295900 | -2.53411500 | -1.94586600 | C          | -1.45636600 | 2.50509100  | -1.67452300 |
| C         | -3.66310100 | -3.09383900 | -2.52834900 | C          | 3.24920900  | -3.79244400 | -0.27313700 |
| C         | -4.90850500 | -2.67216500 | -2.11643300 | C          | 2.35207100  | -2.76359100 | -0.95312300 |
| C         | -5.01316400 | -1.68843200 | -1.11041400 | H          | 6.54520200  | 5.09425600  | 1.18581700  |
| C         | -6.27268500 | -1.21812100 | -0.61126000 | H          | 7.57466200  | 3.66947200  | 0.96369800  |
| C         | -6.32616300 | -0.28994100 | 0.38370300  | H          | 4.16471900  | 4.84753500  | 1.25021300  |
| C         | -5.12453200 | 0.24605300  | 0.95374600  | H          | 6.67674500  | 4.33792600  | -0.42130400 |
| C         | -5.12823500 | 1.18899200  | 2.00354700  | H          | 6.58389500  | 1.50410900  | 0.72578400  |
| C         | -3.93175300 | 1.65013700  | 2.50800900  | H          | 3.11544000  | 2.91666000  | 2.31854000  |
| C         | -2.71161300 | 1.18751700  | 1.96194800  | H          | 4.59562600  | 0.88772200  | 2.01006700  |
| C         | -3.85883400 | -0.17624700 | 0.46944800  | H          | 4.10811200  | 4.06886500  | -0.34765500 |
| C         | -3.80164500 | -1.17134800 | -0.58149800 | H          | 2.12549400  | 3.42686200  | 0.93358100  |
| H         | -3.55815800 | -3.85630500 | -3.29299200 | H          | 5.59656200  | 1.99843900  | -0.66905600 |
| H         | -5.81125900 | -3.09316800 | -2.55101300 | H          | 4.53934300  | 0.07148600  | 0.43094400  |
| H         | -7.18408700 | -1.62813100 | -1.03733800 | H          | 1.37808200  | 1.23974400  | 1.61985200  |
| H         | -7.28144600 | 0.05546900  | 0.76910500  | H          | 1.14420600  | 4.53216700  | -1.10223400 |
| H         | -6.07487900 | 1.53696200  | 2.40847100  | H          | -0.65235600 | 6.23415300  | -1.38797600 |
| H         | 6.04202700  | -3.00007800 | -1.93382300 | H          | 2.36383600  | -0.16963200 | 1.30040500  |
| P         | 0.99069000  | 0.33737400  | -0.60315400 | H          | -0.89759800 | 5.23096800  | 0.05922700  |
| C         | 6.62844000  | 4.13361100  | 0.66646200  | H          | 5.55808200  | -2.37416600 | -0.34207700 |
| C         | 4.22675500  | 3.87925900  | 0.73928100  | H          | 1.88327700  | 2.42074900  | -1.40681200 |

|           |             |             |             |           |             |             |             |
|-----------|-------------|-------------|-------------|-----------|-------------|-------------|-------------|
| H         | 0.26613800  | 4.34270100  | -2.63693300 | C         | 0.66468000  | 4.26749300  | -1.62757500 |
| H         | 4.83560600  | -0.82371400 | -2.08871800 | C         | -0.38850000 | 5.28268000  | -1.18868200 |
| H         | -2.97796800 | 6.79308400  | -1.56158200 | C         | 2.31366700  | 0.71297400  | 0.86973900  |
| H         | -3.91044500 | 2.36774200  | 3.32138800  | C         | 4.76190100  | 0.82411900  | 0.93554900  |
| H         | -3.40662300 | 5.84479400  | -0.11615600 | C         | 5.94442400  | 1.66962500  | 0.47138400  |
| H         | 2.94153200  | 0.35891100  | -2.04623900 | C         | 3.47541700  | 2.84295300  | 1.17184800  |
| H         | 5.68414800  | -4.80163500 | 0.50814500  | C         | 4.69540200  | 3.63794200  | 0.70969300  |
| H         | 3.50091400  | -3.43348600 | 0.74272900  | H         | -1.02356400 | 2.57662100  | -2.86922600 |
| H         | 6.14653100  | -5.26762400 | -1.14813700 | H         | 1.90328300  | -0.87240800 | -2.64873100 |
| H         | 0.82943900  | 1.69897800  | -2.63470600 | H         | -3.03873800 | 3.48478100  | -1.80828000 |
| H         | -2.65677700 | 3.38245100  | -0.10578100 | H         | 4.04278400  | -2.39884200 | -2.94208100 |
| H         | 4.01695900  | -2.12548100 | -2.98468500 | H         | 1.93072000  | -3.25779800 | -1.83100400 |
| H         | -4.18839800 | 5.50445500  | -1.67958400 | H         | -1.37649700 | 1.62576800  | -1.40398500 |
| H         | 1.73092100  | -0.77928700 | -2.66199200 | H         | 1.19338700  | 1.65840300  | -2.66850800 |
| H         | 4.72277300  | -6.00138500 | -0.38829300 | H         | 3.18871700  | 0.17928800  | -2.02798700 |
| H         | -1.43776700 | 2.50213500  | -2.78212000 | H         | 0.78779000  | 4.33106000  | -2.72562400 |
| H         | 1.48156800  | -2.57887200 | -0.31784700 | H         | 4.99159700  | -1.18117800 | -2.05562700 |
| H         | -1.70147000 | 1.49491000  | -1.33684400 | H         | 5.94991200  | -3.50868500 | -1.87077300 |
| H         | -3.48988500 | 3.20460300  | -1.66405700 | H         | 1.50526700  | -2.60350300 | -0.22441300 |
| H         | 2.69517100  | -4.73037700 | -0.15890000 | H         | 2.57686900  | -4.86622300 | -0.09050600 |
| H         | 1.99997300  | -3.17597800 | -1.91896100 | H         | -2.20591600 | 3.62949800  | -0.23961200 |
| N         | 5.51941900  | 3.27254600  | 1.04259600  | H         | 2.26616000  | 2.33535700  | -1.43268800 |
| N         | 3.19300700  | 1.65721500  | 0.59894600  | H         | -0.12974800 | 6.28255700  | -1.54948000 |
| N         | -0.14201600 | 2.87700100  | -1.13732400 | H         | 5.53232400  | -2.79977500 | -0.28883200 |
| N         | -2.20134100 | 4.84702700  | -1.58874300 | H         | 3.49470000  | -3.61627700 | 0.78250900  |
| N         | 3.08151100  | -1.50846200 | -1.16623700 | H         | 1.62894200  | 4.51537000  | -1.16888300 |
| N         | 4.44691800  | -4.04247200 | -1.07624200 | H         | -0.43535000 | 5.30773400  | -0.08717300 |
| <b>3N</b> |             |             |             | H         | 5.93800900  | 1.73778200  | -0.62954900 |
| Cu        | -0.78787100 | -0.60902700 | 0.17407100  | H         | 2.56971000  | -0.26715600 | 1.28399500  |
| I         | -0.31942600 | -2.32661400 | 2.17395300  | H         | 4.63636100  | 3.79854300  | -0.38039900 |
| C         | -1.15089100 | -2.89302900 | -2.26786600 | H         | 4.77622600  | -0.15657700 | 0.45079300  |
| H         | -1.23972700 | -3.61639100 | -3.08189000 | H         | 1.67659000  | 1.20019400  | 1.61528400  |
| H         | -0.43143200 | -2.12070000 | -2.55580100 | H         | 2.55751100  | 3.35268600  | 0.85722400  |
| H         | -0.74305800 | -3.39783300 | -1.38561500 | H         | 6.88991500  | 1.22058300  | 0.78916600  |
| C         | -1.06908300 | 1.89911700  | 2.45308200  | H         | 4.72956900  | 4.61339200  | 1.20427200  |
| H         | -0.45555900 | 2.35063200  | 1.66499900  | H         | 4.84130700  | 0.66570600  | 2.02718500  |
| H         | -0.56173700 | 0.99224700  | 2.80057100  | H         | 3.47101900  | 2.79863400  | 2.27756900  |
| H         | -1.15243000 | 2.60505100  | 3.28298500  | N         | 3.17458600  | -1.68176400 | -1.12513800 |
| N         | -2.45623300 | 0.63237000  | 0.91905400  | N         | 0.26597100  | 2.91616700  | -1.20937200 |
| N         | -2.48443700 | -1.30387700 | -1.01174100 | N         | 3.50862900  | 1.50165200  | 0.58249200  |
| C         | -2.47661200 | -2.27591600 | -1.92702100 | O         | -1.66361700 | 4.97083400  | -1.72881300 |
| C         | -3.67061600 | -2.72605500 | -2.53532500 | O         | 4.30125500  | -4.30923900 | -1.00734700 |
| C         | -4.87685000 | -2.16636400 | -2.17467600 | O         | 5.90480300  | 2.97284000  | 1.04079500  |
| C         | -4.90871800 | -1.15347800 | -1.19304800 | <b>4N</b> |             |             |             |
| C         | -6.12728100 | -0.54416700 | -0.74539300 | Cu        | 0.38550100  | -0.74837900 | -0.18790800 |
| C         | -6.11465300 | 0.40672700  | 0.22911600  | I         | 0.13850900  | -3.25825800 | -0.99841300 |
| C         | -4.88186800 | 0.82767700  | 0.82853000  | C         | 0.88324200  | -1.88592400 | 2.95800700  |
| C         | -4.82094200 | 1.78872300  | 1.85994400  | H         | 0.62025900  | -2.64601700 | 2.21384000  |
| C         | -3.59973500 | 2.13437800  | 2.39644200  | H         | 1.07876500  | -2.36920100 | 3.91839200  |
| C         | -2.41748600 | 1.53674100  | 1.90047200  | H         | 0.01376700  | -1.23036700 | 3.06997300  |
| C         | -3.65230800 | 0.26633000  | 0.39465200  | C         | 0.60647000  | 0.41631800  | -3.35445300 |
| C         | -3.66644000 | -0.75235700 | -0.63512400 | H         | -0.24751600 | 0.97123000  | -2.95058300 |
| H         | -3.62297400 | -3.51449800 | -3.27897800 | H         | 0.38291400  | -0.65096600 | -3.25335200 |
| H         | -5.80495800 | -2.50139100 | -2.63002800 | H         | 0.70958600  | 0.66632700  | -4.41321500 |
| H         | -7.06270800 | -0.86694000 | -1.19369900 | N         | 2.01832200  | -0.56953600 | 1.26297100  |
| H         | -7.04000200 | 0.85833800  | 0.57553400  | N         | 1.91570800  | 0.35304700  | -1.31357300 |
| H         | -5.73845600 | 2.24210200  | 2.22547000  | C         | 1.85588100  | 0.74496900  | -2.58736900 |
| H         | -3.53010000 | 2.86383200  | 3.19640500  | C         | 2.93241600  | 1.43296200  | -3.19476500 |
| P         | 1.22260700  | 0.32310100  | -0.61232900 | C         | 4.07150300  | 1.70177700  | -2.46788400 |
| C         | -1.05987500 | 2.60900900  | -1.76221500 | C         | 4.16036400  | 1.27372400  | -1.12583900 |
| C         | -2.07098000 | 3.66758300  | -1.33225300 | C         | 5.32578200  | 1.48399100  | -0.31734100 |
| C         | 2.45105700  | -0.57583600 | -1.73229500 | C         | 5.38400200  | 1.01054900  | 0.95829300  |
| C         | 4.34274800  | -2.05695700 | -1.93254200 | C         | 4.27997100  | 0.29400200  | 1.52764300  |
| C         | 2.34119300  | -2.86617400 | -0.87968700 | C         | 4.31288200  | -0.25571000 | 2.82725400  |
| C         | 1.26390600  | 1.92346500  | -1.59583100 | C         | 3.22656400  | -0.96170000 | 3.29517600  |
| C         | 5.11945600  | -3.17664700 | -1.23988900 | C         | 2.07656200  | -1.10827200 | 2.48371300  |
| C         | 3.17129900  | -3.95747400 | -0.21292600 | C         | 3.09476700  | 0.09630900  | 0.77192100  |

|           |             |             |             |           |             |             |             |
|-----------|-------------|-------------|-------------|-----------|-------------|-------------|-------------|
| C         | 3.03679500  | 0.59198200  | -0.58920900 | C         | 2.97153986  | 1.60771362  | -0.03428806 |
| H         | 2.84906500  | 1.73856200  | -4.23238700 | H         | 2.48401715  | 2.38101053  | -0.63876216 |
| H         | 4.90863500  | 2.22828200  | -2.91865100 | H         | 2.62140349  | 1.74174696  | 0.99802791  |
| H         | 6.16764000  | 2.01712900  | -0.75022600 | N         | 4.42641139  | 1.71727350  | -0.15173048 |
| H         | 6.27380100  | 1.15687900  | 1.56433400  | C         | 4.87229646  | 2.92105745  | -0.85751626 |
| H         | 5.20133200  | -0.12899700 | 3.44030800  | H         | 4.61608648  | 3.84062821  | -0.29798274 |
| H         | 3.23784500  | -1.41055200 | 4.28273900  | H         | 4.36768760  | 2.96822024  | -1.82833323 |
| P         | -1.56804300 | 0.52750400  | 0.17205300  | C         | 6.38421782  | 2.87691019  | -1.07119096 |
| C         | -5.24106700 | -0.47250500 | -2.49846800 | H         | 6.62597270  | 2.03515663  | -1.75188935 |
| C         | -5.39724100 | 0.39914300  | -1.41638900 | H         | 6.70938380  | 3.80209160  | -1.56174770 |
| C         | -3.99511900 | -1.04210500 | -2.75804000 | N         | 7.07955908  | 2.75471482  | 0.20671106  |
| C         | -4.30707800 | 0.70488000  | -0.60336800 | C         | 6.62989867  | 1.56323054  | 0.92276664  |
| C         | -2.89876600 | -0.73531500 | -1.94748800 | H         | 7.13253545  | 1.52704853  | 1.89620103  |
| C         | -3.18948700 | -0.94733100 | 3.64166700  | H         | 6.89313120  | 0.63462695  | 0.37664787  |
| C         | -3.04260100 | 0.15050300  | -0.87042700 | C         | 5.11868547  | 1.60317197  | 1.13559462  |
| C         | -2.63239900 | -0.81071600 | 2.37084100  | H         | 4.79674021  | 0.68569338  | 1.63683941  |
| C         | -3.40021100 | 0.17922600  | 4.44153500  | H         | 4.86858777  | 2.45006989  | 1.80105124  |
| C         | -2.28901200 | 0.46010800  | 1.87515500  | C         | 8.52442772  | 2.78293973  | 0.04788536  |
| C         | -3.05426700 | 1.44199300  | 3.96076000  | H         | 8.91584036  | 1.93924590  | -0.55373003 |
| C         | -2.00137700 | 3.15017400  | -0.94124200 | H         | 9.00557017  | 2.74690695  | 1.03082935  |
| C         | -2.50406500 | 1.58464100  | 2.68375900  | H         | 8.82561350  | 3.71472995  | -0.44239548 |
| C         | -1.23748600 | 2.32654200  | -0.10153500 | C         | 2.88292004  | -0.04000703 | -2.40700025 |
| C         | -1.64970200 | 4.48917300  | -1.13359300 | H         | 3.93493826  | 0.26047317  | -2.34099393 |
| C         | -0.10636400 | 2.87491700  | 0.53050600  | H         | 2.85302356  | -1.08801915 | -2.75339373 |
| C         | -0.53835700 | 5.02693900  | -0.48501500 | N         | 2.18187838  | 0.88550179  | -3.29372723 |
| C         | 0.23231600  | 4.21518800  | 0.35164500  | C         | 2.99303238  | 1.27217543  | -4.45086556 |
| H         | -6.09333100 | -0.71529700 | -3.12703600 | H         | 3.22546817  | 0.40353288  | -5.09622107 |
| H         | -6.36961400 | 0.83357100  | -1.20161200 | H         | 3.94334035  | 1.68603517  | -4.09489567 |
| H         | -3.87251300 | -1.73882100 | -3.58204900 | C         | 2.26141910  | 2.32557337  | -5.28106085 |
| H         | -3.45486100 | -1.93489100 | 4.00812700  | H         | 2.15297997  | 3.24779581  | -4.67500627 |
| H         | -4.44004500 | 1.36839600  | 0.24628300  | H         | 2.86424283  | 2.57808180  | -6.16154075 |
| H         | -2.46278200 | -1.69292600 | 1.75845900  | N         | 0.96734828  | 1.81862398  | -5.72861456 |
| H         | -1.94206400 | -1.21705700 | -2.12451300 | C         | 0.15660091  | 1.41036828  | -4.58366216 |
| H         | -3.83007500 | 0.07150300  | 5.43327200  | H         | -0.78341356 | 0.98428671  | -4.95412240 |
| H         | -2.87201400 | 2.74966300  | -1.44882500 | H         | -0.10000148 | 2.27268745  | -3.93588028 |
| H         | -2.25083700 | 5.11149900  | -1.79067700 | C         | 0.89026645  | 0.36423175  | -3.74850468 |
| H         | -3.21602000 | 2.32269400  | 4.57624900  | H         | 0.028639296 | 0.10446505  | -2.87483519 |
| H         | -2.24564900 | 2.57380600  | 2.32037900  | H         | 1.02472167  | -0.55282822 | -4.35500218 |
| H         | 0.51255300  | 2.24456400  | 1.16340900  | C         | 0.27300212  | 2.77060419  | -6.57947993 |
| H         | -0.26999000 | 6.06899800  | -0.63334400 | H         | -0.66479360 | 2.33242043  | -6.93720317 |
| H         | 1.10353900  | 4.62294500  | 0.85664400  | H         | 0.89047759  | 3.00752736  | -7.45240744 |
| <b>1P</b> |             |             |             | H         | 0.03011344  | 3.72222584  | -6.06662268 |
| Cu        | 0.00000000  | 0.00000000  | 0.00000000  | C         | 3.33657556  | -1.29583789 | 0.11046936  |
| I         | 0.00000000  | 0.00000000  | 2.66160038  | H         | 4.35996695  | -1.06244914 | -0.20118500 |
| N         | -1.66465876 | -1.10148241 | -0.85824769 | H         | 3.28490545  | -1.18670657 | 1.20562811  |
| N         | -1.37469632 | 1.59206225  | -0.61486234 | N         | 2.97961075  | -2.64171861 | -0.33770179 |
| C         | -1.23439041 | 2.90186623  | -0.44807774 | C         | 4.13901693  | -3.51853936 | -0.51827925 |
| C         | -2.24871576 | 3.82761063  | -0.75339174 | H         | 4.67091972  | -3.69992311 | 0.43476747  |
| C         | -3.45162023 | 3.36201970  | -1.24743050 | H         | 4.84161700  | -3.04012907 | -1.20978698 |
| C         | -3.63847534 | 1.97394402  | -1.42406823 | C         | 3.69286199  | -4.85915528 | -1.09968991 |
| C         | -4.86001120 | 1.40435639  | -1.91803847 | H         | 3.28600956  | -4.68990099 | -2.11714549 |
| C         | -5.00098041 | 0.05636596  | -2.05376130 | H         | 4.56174821  | -5.52092650 | -1.19627674 |
| C         | -3.93430776 | -0.83853818 | -1.70320625 | N         | 2.71330683  | -5.49718206 | -0.22488213 |
| C         | -4.04465915 | -2.24200791 | -1.80545044 | C         | 1.56160716  | -4.62268000 | -0.01869995 |
| C         | -2.97721028 | -3.03489772 | -1.43234121 | H         | 0.87530471  | -5.10628033 | 0.68631970  |
| C         | -1.80392830 | -2.41923616 | -0.96090323 | H         | 1.00792914  | -4.45470458 | -0.96666751 |
| C         | -2.70788159 | -0.31121903 | -1.22000993 | C         | 2.00238652  | -3.27793077 | 0.55112986  |
| C         | -2.55572614 | 1.12083182  | -1.08424324 | H         | 2.42913969  | -3.43685723 | 1.55856373  |
| H         | -0.28150051 | 3.23440241  | -0.04687626 | H         | 1.14249451  | -2.61224105 | -0.67190773 |
| H         | -2.07551216 | 4.88684586  | -0.59608837 | C         | 2.32517903  | -6.81275789 | -0.70477430 |
| H         | -4.25773963 | 4.04742828  | -1.49469762 | H         | 3.20973054  | -7.45290253 | -0.78971770 |
| H         | -5.67576520 | 2.07351809  | -2.17700136 | <b>3P</b> |             |             |             |
| H         | -5.93072143 | -0.36713841 | -2.42321323 | Cu        | -0.83506700 | -0.55315500 | -0.63284900 |
| H         | -4.96847720 | -2.68211199 | -2.17087281 | I         | -0.50525200 | -2.15951400 | -2.71506600 |
| H         | -3.02887583 | -4.11668953 | -1.49324634 | N         | -2.19873900 | 1.06837000  | -1.20845200 |
| H         | -0.95170559 | -3.01766732 | -0.65395505 | N         | -2.58208700 | -0.92090600 | 0.60715100  |
| P         | 2.22320199  | 0.00000000  | -0.65501645 | C         | -2.77247000 | -1.91246700 | 1.47119800  |

|   |             |             |             |           |             |             |             |
|---|-------------|-------------|-------------|-----------|-------------|-------------|-------------|
| C | -3.96968000 | -2.09095500 | 2.18714100  | N         | 2.12340900  | -2.30318300 | 1.47946100  |
| C | -5.00641500 | -1.20033000 | 1.98784300  | N         | 1.06516300  | 2.22649100  | 1.74613500  |
| C | -4.84362800 | -0.14156000 | 1.06851800  | N         | 3.54465700  | 1.24354800  | -1.07686700 |
| C | -5.87656600 | 0.81554600  | 0.78799700  | O         | 1.88113000  | -4.65675400 | 3.07277300  |
| C | -5.68734900 | 1.80531200  | -0.12865400 | O         | -0.35789500 | 4.28062900  | 3.13963800  |
| C | -4.44713000 | 1.92539200  | -0.84170800 | O         | 6.13683300  | 2.31438600  | -1.57149400 |
| C | -4.21280200 | 2.91568000  | -1.82049300 | <b>4P</b> |             |             |             |
| C | -2.99717100 | 2.94873700  | -2.47585100 | Cu        | -0.43629100 | -0.62959200 | -0.13661400 |
| C | -2.01576100 | 1.99904200  | -2.13757700 | I         | -0.37325600 | -3.25819400 | 0.01410100  |
| C | -3.39489200 | 1.01091700  | -0.57360700 | N         | -2.05404600 | 0.01684300  | -1.44413500 |
| C | -3.59751500 | -0.04462700 | 0.39505200  | N         | -1.94451600 | 0.13242500  | 1.27511000  |
| H | -1.94293700 | -2.60067500 | 1.60086500  | C         | -1.88473400 | 0.15972200  | 2.60182800  |
| H | -4.06345300 | -2.92092600 | 2.87915100  | C         | -2.97910500 | 0.51707600  | 3.41089300  |
| H | -5.94636000 | -1.30701400 | 2.52227000  | C         | -4.17480000 | 0.85397400  | 2.80758800  |
| H | -6.82054300 | 0.72771800  | 1.31835600  | C         | -4.27371700 | 0.82785800  | 1.39930300  |
| H | -6.47815500 | 2.51917400  | -0.34120200 | C         | -5.48023200 | 1.15443400  | 0.69323600  |
| H | -4.99360600 | 3.63432300  | -2.05396700 | C         | -5.53369800 | 1.10128600  | -0.66685200 |
| H | -2.78945600 | 3.68775200  | -3.24222700 | C         | -4.38564400 | 0.71609800  | -1.43807900 |
| H | -1.05471800 | 1.98682700  | -2.64342400 | C         | -4.39984900 | 0.63058200  | -2.84723900 |
| P | 1.30784800  | -0.03507500 | 0.11010600  | C         | -3.25574100 | 0.24084200  | -3.51532700 |
| C | -0.30817200 | 2.02304100  | 2.22101000  | C         | -2.10156200 | -0.05935100 | -2.76922800 |
| C | 0.76006800  | -4.12466800 | 2.37782400  | C         | -3.17209800 | 0.39484900  | -0.77517000 |
| C | 2.80317300  | -3.63211000 | 3.41330000  | C         | -3.11482200 | 0.45343600  | 0.66975600  |
| C | 1.18558500  | -3.37317000 | 1.12052100  | H         | -0.93157000 | -0.11406700 | 3.04496500  |
| C | 3.28022800  | -2.87293500 | 2.17606200  | H         | -2.87081000 | 0.52126900  | 4.49023100  |
| C | 2.49025100  | -1.46939000 | 0.33618400  | H         | -5.04142700 | 1.13384000  | 3.40043600  |
| C | 1.80689600  | 0.97518300  | 1.60620300  | H         | -6.35575000 | 1.44048600  | 1.26944100  |
| C | 2.13928600  | 0.89925400  | -1.29270800 | H         | -6.45244500 | 1.34452700  | -1.19321900 |
| C | 4.46558200  | 0.59790900  | -2.01825600 | H         | -5.31134100 | 0.86732900  | -3.38932500 |
| C | 5.90588700  | 0.91245200  | -1.61969500 | H         | -3.23343800 | 0.15939700  | -4.59677300 |
| C | -1.03600500 | 3.36219300  | 2.29226700  | H         | -1.18908600 | -0.37785600 | -3.26489300 |
| C | 1.75150000  | 3.16902400  | 2.63735700  | P         | 1.60438700  | 0.48138500  | -0.08549300 |
| C | 3.79272100  | 2.68715000  | -1.03160800 | C         | 1.59801100  | 2.19581600  | -0.77639300 |
| C | 0.97598200  | 4.48379300  | 2.69652700  | C         | 0.46937400  | 2.98973500  | -0.50580700 |
| C | 5.25081100  | 2.94591100  | -0.65896700 | C         | 0.37511100  | 4.28826700  | -1.00399100 |
| H | 0.12338200  | -4.97596300 | 2.11909200  | C         | 1.39860500  | 4.80853800  | -1.80045600 |
| H | 3.64436800  | -4.12230400 | 3.91263600  | C         | 2.51527800  | 4.02394100  | -2.08932900 |
| H | 0.19488300  | -3.44587200 | 3.04004100  | C         | 2.61807300  | 2.72726400  | -1.57884200 |
| H | 2.34015900  | -2.92070600 | 4.11755700  | C         | 2.15726000  | 0.70274900  | 1.66319500  |
| H | 1.64558500  | -4.08447600 | 0.40995900  | C         | 2.66002100  | 1.90552200  | 2.17913100  |
| H | 3.85428000  | -3.56261200 | 1.52819400  | C         | 3.04590600  | 1.99175200  | 3.51946800  |
| H | 0.31616200  | -2.93974700 | 0.61567900  | C         | 2.93779200  | 0.87952000  | 4.35508000  |
| H | 3.95175400  | -2.06236300 | 2.48300100  | C         | 2.43782900  | -0.32319700 | 3.84815000  |
| H | 2.52124500  | -2.03132300 | -0.61137900 | C         | 2.04337500  | -0.41275900 | 2.51299400  |
| H | 3.48329000  | -1.03882200 | 0.50380200  | C         | 3.03970900  | -0.34928300 | -0.88399500 |
| H | 1.71754200  | 0.31391100  | 2.48650600  | C         | 2.78146700  | -1.34032000 | -1.84212400 |
| H | -0.31552100 | 1.55349600  | 3.22457800  | C         | 3.83637300  | -1.99239100 | -2.48392500 |
| H | -0.83077300 | 1.35251300  | 1.53286300  | C         | 5.15597500  | -1.66852800 | -2.16804800 |
| H | 4.30604300  | -0.48542000 | -1.99562700 | C         | 5.42272000  | -0.69543200 | -1.20102500 |
| H | 2.86905100  | 1.21072800  | 1.47259400  | C         | 4.37144100  | -0.04166700 | -0.55875900 |
| H | 6.12070900  | 0.45851900  | -0.63794100 | H         | -0.33976200 | 2.57998300  | 0.09309200  |
| H | 2.00216800  | 0.27366300  | -2.18333300 | H         | -0.50110700 | 4.89031300  | -0.77969600 |
| H | 1.85162500  | 2.76188600  | 3.66197300  | H         | 1.32189800  | 5.81657500  | -2.19802400 |
| H | 6.60672400  | 0.50577700  | -2.35439200 | H         | 3.31211300  | 4.41919400  | -2.71327800 |
| H | -2.03790200 | 3.23296700  | 2.71238100  | H         | 3.49237900  | 2.12869700  | -1.81121800 |
| H | 4.29314900  | 0.94062800  | -3.05549700 | H         | 2.74742600  | 2.77712200  | 1.53809000  |
| H | 1.53539100  | 1.80093300  | -1.45089900 | H         | 3.43346100  | 2.92970300  | 3.90786100  |
| H | 2.76162500  | 3.35602300  | 2.25381500  | H         | 3.24030100  | 0.94873800  | 5.39622900  |
| H | -1.13065500 | 3.78145400  | 1.27680800  | H         | 2.35151700  | -1.19385300 | 4.49217300  |
| H | 5.43615700  | 2.58163500  | 0.36566200  | H         | 1.64643100  | -1.34831900 | 2.12448200  |
| H | 3.12899300  | 3.13982400  | -0.28684000 | H         | 1.75614300  | -1.62862900 | -2.05312100 |
| H | 1.44086700  | 5.17303100  | 3.40779300  | H         | 3.62304900  | -2.76609000 | -3.21553900 |
| H | 3.58075700  | 3.16628800  | -2.00673200 | H         | 5.97612500  | -2.18214600 | -2.66189500 |
| H | 0.97869900  | 4.95261900  | 1.69835600  | H         | 6.44913100  | -0.45170900 | -0.94121300 |
| H | 5.47520400  | 4.01617500  | -0.69551800 | H         | 4.58597700  | 0.70026600  | 0.20499500  |
